# Supplementary material for: Marine Biodiversity in Japanese Waters
Source: PubMed Central journal article supplement (PMC2914005; doi:10.1371/journal.pone.0011836), 2010-08-02
Supplement: pone.0011836.s008.pdf [file pone.0011836.s008.pdf]

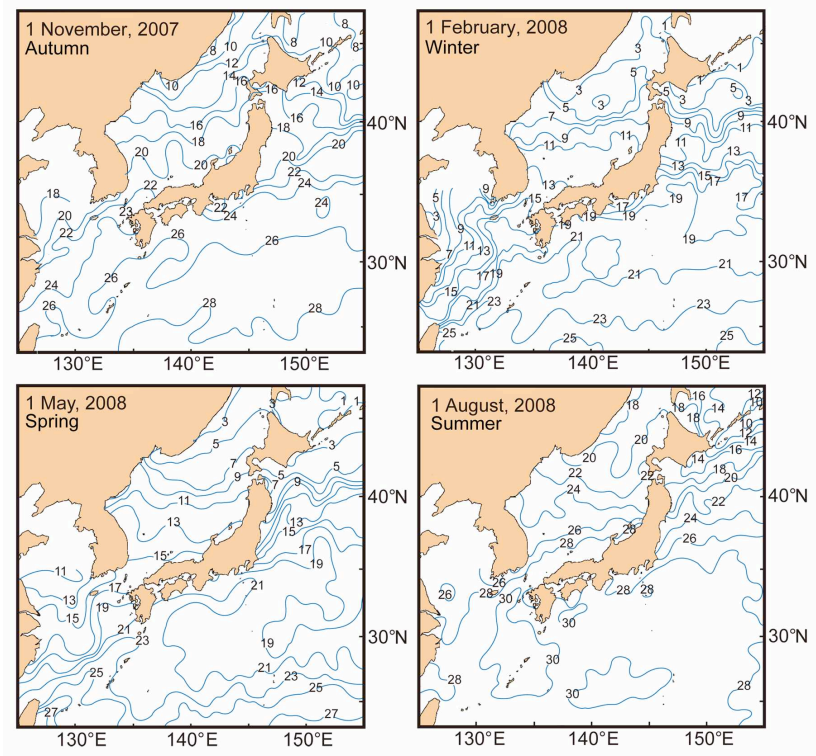

Figure 4. 日本近海の季節毎の表面水温.

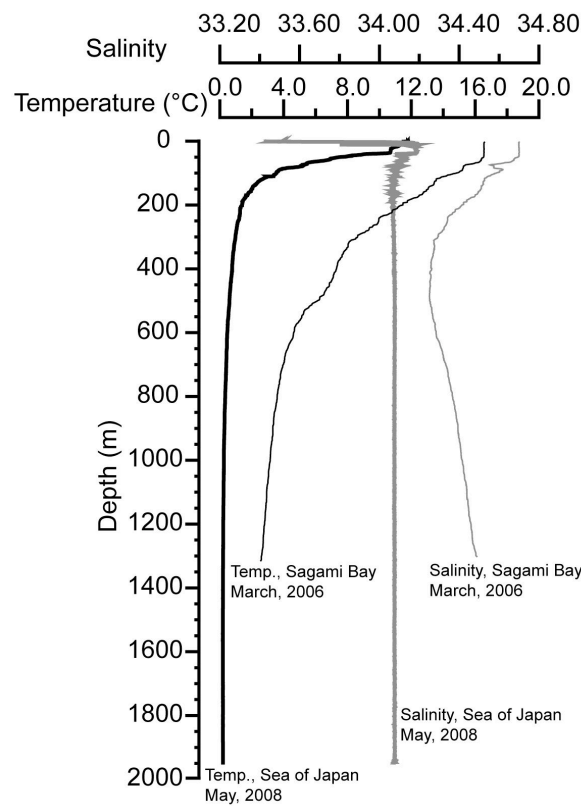

Figure 5. 太平洋側の相模湾と日本海の鉛直水温と塩分濃度の比較.

## 日本の海洋生物研究史 (Table S1) Brief history of research in Japan

日本は、1616年から1858年まで鎖国制度により外国との交流を制限していた。この鎖国期間には、生物学データは本草学や俳句の季語として集積されていた。鎖国期間中も貿易を許されていたオランダは、日本近海の海洋生物を自国に持ち帰り、それらのサンプルはヨーロッパの研究者によって研究され、モノグラフとなった。1858年以降、ドイツとアメリカから何人かの研究者が日本の大学で博物学の講義を行った。彼らは、日本の海洋生物相を研究した。第二次世界大戦前には、博物館や海洋研究機関が設立され、日本における海洋生物研究の基礎が培われた。

1875年にはイギリスのチャレンジャー号によって、相模湾や房総沖の調査が行われ、またチャレンジャー号の研究者は市場などでサンプルとして様々な海洋生物を購入した。1906年にはアメリカのアルバトロス号によって相模湾や駿河湾の調査が行われた。1929年には海洋生物研究を目的とした世界初の有人潜水調査船「西村式豆潜水艇1号」が作られ、これにはディーゼルエンジン、サンプル採集装置、水中ライト、観察窓、水中通話器などが装備されていた。1955年以降には、大型の海洋研究船も運用され、大規模な海洋生物調査や国際プロジェクトへの参加が推進された。昭和天皇は、海洋生物研究者でもあり、共同研究者とともに節足動物、ホヤ類、刺胞動物、棘皮動物、軟体動物、海綿動物のモノグラフを積極的に出版した [8-18]。

## 方法 Methods

### 種数評価 Species richness estimation

日本近海（領海とEEZ）の海洋生物種数を分類階級の目レベルで、出現種数（NDS）、固有種数（NES）、今後出現が記録される種数（NUS）、外来種数（NIS）について評価した。目レベルに分類することができない分類群については、上目、下目、亜目もしくは科レベルで、それぞれの数を評価した。さらに、分類学研究者数、種同定に役立つ文献数（モノグラフ、図鑑、論文、ホームページ）についても情報を収集した。1つの分類群に多数の分類学研究者数を含む場合は2名を示した。種同定に用いられる文献は、種同定に参照できる図鑑やモノグラフを対象にした [1]。

また、分類群毎の研究進捗レベルを以下の定義に基づき5段階に評価した。

**Status 5:** データがとても豊富な分類群。以下の条件を全て満たすもの。(1) 日本近海に出現する種のうち80%以上もしくは100種以上が科学的文献に記録されていること。(2) 種同定に役立つ文献が過去20年以内に公表されていること。(3) 専門とする分類学研究者が少なくとも1人は日本にいること。

**Status 4:** データが豊富な分類群。(1) 日本近海に出現する種のうち70%以上もしくは10種以上が科学的文献に記録されていること。(2) 種同定に役立つ文献が公表されていること。(3) 専門とする分類学研究者が少なくとも1人は日本にいること。

**Status 3:** データが少ない分類群。(1) 日本近海に出現する種のうち50%以上もしくは10種以下が科学的文献に記録されていること。(2) 種同定に役立つ文献が公表されていること。(3) 専門とする分類学研究者が日本にいないこと。

**Status 2:** データがとても少ない分類群。以下の条件の少なくとも1つにあてはまるもの。(1) 日本近海に出現する種のうち50%以下もしくは数種が科学的文献に記録されていること。(2) 種同定に役立つ文献や専門研究者が認められないこと。

**Status 1:** 不明な分類群。以下の条件のいずれかにあてはまるもの。(1) 日本近海に出現記録がないこと。(2) 関連する情報が認められないもの。

本研究に用いるデータは、Table S2に挙げた多くの研究者から提供を受けた。それぞれの分類群のNDSを積算し日本近海の海洋生物総種数 (tNDS) とした。NUSは、Table 2Sに挙げた研究者が研究中のサンプル、経験、知識から予測した値を用いた。また、NDSとNUSを合算し、それぞれの分類群が含む推定種数 (ENS) を評価した。そして、tNDSとすべてのNUSを合算し日本近海に生息する推定総種数を求めた。

これまでに日本近海にのみ出現記録がある種を固有種とした。NDSに対するNESの割合 (PES) を  $PES = (NES/NDS) \times 100$  に従い求めた。外来種は、自然環境下では日本近海に生息していない種が、人為的行為により日本近海に移入してきたものとした。外来種に関しては、種数 (NIS) だけでなく種名、それぞれの移入過程、移入元を示した。

最新の日本近海に分布する海洋生物の多様性や分布を包括した文献、データベースが見あたらない。そこで、専門研究者のいない分類群は、日本分類学会連合がまとめた日本産生物種数調査や (<http://research2.kahaku.go.jp/ujssb/search>)、文献などからのデータを集めた。海洋生物研究は、潮間帯だけでなく外洋や深海域でも行われるため、現在活動している調査船のうち500トン以上のものについてTable 3に示した。

Table 3. 日本における 500 トン以上の海洋調査船リスト.

| 海洋調査船名 | 大きさ(トン) | 所属機関     | 主目的                                  |
|--------|---------|----------|--------------------------------------|
| 望星丸    | 2,174   | 東海大学     | Multi-purpose missions               |
| ちきゅう   | 57,087  | 海洋研究開発機構 | Drilling                             |
| 白鳳丸    | 3,991   | 海洋研究開発機構 | Multi-purpose missions               |
| 北光丸    | 568     | 水産庁      | Fisheries science                    |
| かいれい   | 4,628   | 海洋研究開発機構 | Support of remotely operated vehicle |
| かいよう   | 3,350   | 海洋研究開発機構 | Multi-purpose missions               |
| 開洋丸    | 2,942   | 水産庁      | Fisheries science                    |
| 啓風丸    | 1,882   | 気象庁      | Oceanography                         |
| 敬天丸    | 860     | 鹿児島大学    | Fisheries science, Oceanography      |
| 耕洋丸    | 2,703   | 水産庁      | Fisheries science, Oceanography      |
| みらい    | 8,687   | 海洋研究開発機構 | Multi-purpose missions               |
| 長崎丸    | 842     | 長崎大学     | Fisheries science, Oceanography      |
| なつしま   | 1,739   | 海洋研究開発機構 | Support of remotely operated vehicle |
| おしよろ丸  | 1,792   | 北海道大学    | Fisheries science, Oceanography      |
| 凌風丸    | 1,380   | 気象庁      | Oceanography                         |
| 神鷹丸    | 649     | 東京海洋大学   | Fisheries science, Oceanography      |
| しらせ    | 12,500  | 国立極地研究所  | Antarctic Expedition                 |
| 照洋丸    | 2,494   | 水産庁      | Fisheries science                    |
| 俊鷹丸    | 1,228   | 水産庁      | Fisheries science                    |
| 蒼鷹丸    | 1,234   | 水産庁      | Fisheries science                    |
| 淡青丸    | 610     | 海洋研究開発機構 | Multi-purpose missions               |
| 天鷹丸    | 1,020   | 水産庁      | Fisheries science                    |
| 海鷹丸    | 1,886   | 東京海洋大学   | Fisheries science, Oceanography      |
| 若鷹丸    | 692     | 水産庁      | Fisheries science                    |
| 陽光丸    | 608     | 水産庁      | Fisheries science                    |
| よこすか   | 4,439   | 海洋研究開発機構 | Support of human occupied vehicle    |

## OBIS に収録されている情報と NDS の比較 Comparisons between NDS and the number of species recorded from Japanese waters in OBIS

Ocean Biogeographic Information System (OBIS: <http://www.iobis.org/>) は「海洋生物のセンサス」(CoML) のもとに構築された海洋生物地理情報データベースで、世界中の海洋生物の多様性や分布を解析することに役立つ。2009年6月6日にOBISを用いて、日本のEEZ内から記録されている各分類群のOBIS内種数(NDS<sub>o</sub>)を求め、さらにOBISのpolygonによって日本のEEZ内の総種数を求めた。そして、本研究で得られたNDSとNDS<sub>o</sub>を比較するために、NDSに対するNDS<sub>o</sub>の割合(PRO)を $PRO = (NDS_o / NDS) \times 100$ で求めた。

## 結果 Results

### 日本近海の生物種数 Species richness in Japanese waters

日本近海の海洋生物種数に関するデータのうち、出現種数(NDS)、分類群毎の研究進捗レベル、外来種数(NIS)、分類学者数、種同定に役立つ文献数をTable 4に示した。目レベル(もしくは下位の分類群)のNDS、固有種数(NES)、今後出現が記録される種数(NUS)、推定種数(ENS)、NIS、分類学者数、種同定に役立つ文献数、研究進捗レベルはTable S3に示した。日本近海の海洋生物総種数(tNDS)は33629となった。全79門のうち、66門が1種以上の種が認められたが、13門については情報が得られずNDSとNUSは評価できなかった(Table S4)。

真核生物Eukaryaの門は、人との係わりがあり大型で浅海に生息するため多くの種数が記録されている傾向にあった。軟体動物門MolluscaのNDSは8658となり最も高い値を示し、2番目が節足動物門Arthropoda、3

番目が脊索動物門Chordataとなった。NDSが大きな上位10までの門だけで、日本近海の海洋生物総種数 (tNDS) の85%を占めた (Figure 6) 。一方で、人との係わりが少なく小型種を多く含む門のNDSは小さくなった (Table S4) 。

Table 4. 日本近海における海洋生物の出現種数, 研究進捗レベル, 外来種数, 分類学研究者数, 種同定に役立つ文献数の概要.

| 分類群                                       |                                       | NDS <sup>1</sup> | State of knowledge <sup>2</sup> | NIS <sup>3</sup> | 分類学研究者数 | 種同定に役立つ文献数 |
|-------------------------------------------|---------------------------------------|------------------|---------------------------------|------------------|---------|------------|
| Domain Archaea                            |                                       | 9                | 1-3                             | ND               | 10      | >10        |
| Domain Bacteria (including Cyanobacteria) |                                       | 843              | 3-5                             | ND               | 10      | >10        |
| Domain Eukarya                            |                                       |                  |                                 |                  |         |            |
| Kingdom Chromista                         | Phaeophyta (Phaeophyceae)             | 304              | 3, 4                            | 1                | 2       | >3         |
|                                           | Other Chromista                       | 943              | 3-5                             | ND               | 2       | >3         |
| Kingdom Plantae                           | Chlorophyta                           | 248              | 3, 4                            | 1                | 2       | >3         |
|                                           | Rhodophyta                            | 898              | 3-5                             | 0                | 2       | >3         |
|                                           | Angiospermae                          | 44               | 4                               | 0                | 2       | >3         |
|                                           | Other Plantae                         | 5                | 3, 4                            | ND               | 2       | >3         |
| Kingdom Protista (Protozoa)               | Dinomastigota (Dinoflagellata)        | 470              | 3-5                             | 0                | 4       | >1         |
|                                           | Foraminifera                          | 2,321            | 3-5                             | 0                | 5       | 6          |
|                                           | Other Protista                        | 1,410            | 1-5                             | 0                | 16      | >50        |
| Kingdom Fungi                             |                                       | 367              | 1-4                             | 0                | 2       | 3          |
| Kingdom Animalia                          | Porifera                              | 745              | 1-5                             | 0                | 1       | 14         |
|                                           | Cnidaria                              | 1,876            | 1-5                             | 1                | 16      | >10        |
|                                           | Platyhelminthes                       | 188              | 1-5                             | 0                | 2       | 1          |
|                                           | Mollusca                              | 8,658            | 1-5                             | 11               | 10      | >10        |
|                                           | Annelida                              | 1,076            | 1-5                             | 10               | 7       | 4          |
|                                           | Crustacea                             | 6,232            | 2-5                             | 10               | >20     | >10        |
|                                           | Bryozoa                               | 300              | 5                               | 0                | 2       | >1         |
|                                           | Echinodermata                         | 1,052            | 3-5                             | 0                | 6       | 2          |
|                                           | Urochordata (Tunicata)                | 384              | 4, 5                            | 2                | 4       | >3         |
|                                           | Other invertebrates                   | 1,314            | 1-5                             | 2                | >10     | >10        |
|                                           | Vertebrata (Pisces)                   | 3,790            | 3-5                             | 1                | 15      | >50        |
|                                           | Other vertebrates                     | 152              | 3-5                             | 0                | 4       | >50        |
|                                           | Sub-Total Eukarya                     | 32,777           |                                 | 39               |         |            |
|                                           | Total Regional Diversity <sup>4</sup> | 33,629           |                                 | 39               |         |            |

<sup>1</sup> 出現種数.

<sup>2</sup> 研究進捗レベル: 方法参照.

<sup>3</sup> 外来種数.

<sup>4</sup> 全ての分類群の詳細は Table S3.

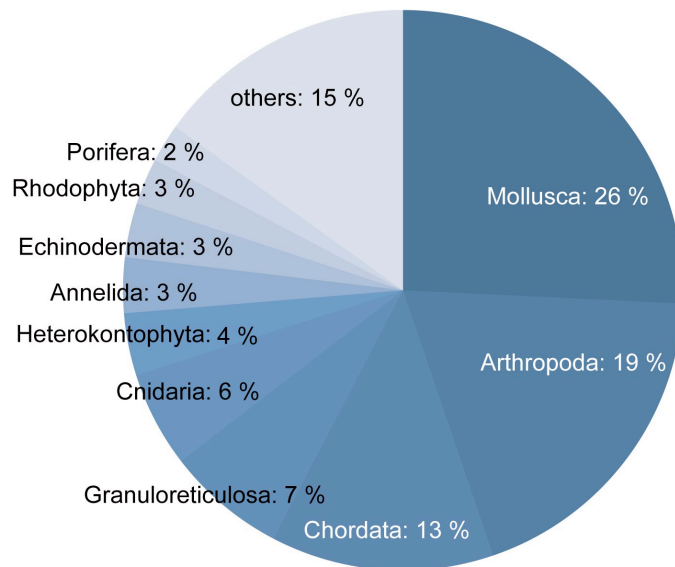

Figure 6. 生物門毎の日本近海出現種数（NDS）の割合．日本近海の海洋生物総種数（tNDS）に対するNDSが高い上位10位で全体の85%を占める．

固有種数（NES）の総数は、少なくとも1872となった（Table S5）．3つの綱、有孔虫綱Foraminifera、条鰭綱Actinopterygii、腹足綱GastropodaのNESはそれぞれ383、358、286種と高く、2つの目、アミ目Mysidaとヤギ目Gorgonaceaも高いNESを示し、NDSに対するNESの割合（PES）も約50%と高く、これらの分類群には固有種が多い傾向が認められた．節足動物門のプラティコピア目Platycopioidea、胴甲動物門Loricifera、類線形動物門Nematomorphaからは1-2種しか出現しなかったが、それらは全て日本の固有種となった．ハプト植物門Haptophytaと環形動物門Annelidaのサシバゴカイ目Phyllodocidaは、比較的高いNDSとなったにもかかわらず、NESは低く固有種が少ない傾向にあった．

今後出現が記録される種数（NUS）と推定種数（ENS）の総数は、それぞれ121913と155542となり（Table S4）、このENS数155542が、本研究で評価した日本近海に生息する推定総種数となった．線虫動物門NematodaのNDSは70にもかかわらずNUSは115010にもなり（Table S4）、日本近海の線虫動物門の種はほとんどが未記載種であった．比較的分類学研究が進んでいる脊索動物門、軟体動物門、節足動物門にも多数の未記載種が認められ（Tables S3, S4）、例えば腹足綱の後鰓類Nudibranchia、節足動物門の端脚目Amphipodaや等脚目Isopoda、脊索動物門のハゼ科Gobiidaeには、200以上の未記載種が含まれていた．大型種を多く含む分類群でも、低次分類群になると研究の進捗レベルは様々であった．

日本近海における外来種数（NIS）の総数は39で、軟体動物門から10、環形動物門と節足動物門からそれぞれ10、脊索動物門から3、粘液胞子虫門Myxozoaから2、緑色植物門Chlorophyta、刺胞動物門Cnidaria、不等毛植物門Heterokontophytaからそれぞれ1種認められた（Table S6）．これら外来種の実移入メカニズムは、船舶への付着やバラスト水への混入、輸入された水産物への混入であった．他方、日本ベントス学会によると40種以上の日本近海種が、他国の海域に外来種として侵入している．

## 研究進捗レベル State of knowledge

12の門（鉤頭動物門Acanthocephala、アメーバ動物門Amoebozoa、コウマクノウキン門Blastocladiomycota、ツボカビ門Chytridiomycota、有輪動物門Cycliophora、グロムス菌門Glomeromycota、太陽虫門Heliozoa、微胞子虫門Microsporidia、卵菌門Oomycota、オパリナ門Opalozoa、ペルコロゾア門Percolozoa、タウムアーキオータ門Thaumarchaeota）は、情報が得られず不明な分類群（Status 1）とした（Table S3）．これら不明な分類群の多くは、寄生性で真菌やいわゆる原生生物に属しているものであった．食用種や大型種を多く含む分類群は研究の進捗レベルが高くなったが、海綿動物門Porifera、刺胞動物門、軟体動物門、環形動物門といった比較的に付きやすい分類群の中にも、低次分類群では研究の進捗レベルが高くないものが認められた（Tables S3, S4）．

OBIS に収録されている情報と NDS の比較 Comparisons between NDS and the number of species recorded from Japanese waters in OBIS

NDSがOBIS内にどれくらい収録されているかを解析するために求めた日本近海各分類群のOBIS内種数 (NDS<sub>o</sub>) の割合 (PRO) は、3つの門、線形動物門、箒虫動物門Phoronida、鰓曳動物門Priapulidaでほぼ100%となった (Table 5)。これらの門においては、NDSとNDS<sub>o</sub>がほぼ同じことを示しているが、学名を確認していないため同じ種を含んだ数かどうかは不明である。節足動物門、脊索動物門、棘皮動物門Echinodermata、不等毛植物門、軟体動物門のように高いNDSを示した門のPROは低い値となった。環形動物門のPROは中庸な値であった。日本近海の海洋生物総種数 (tNDS) は33629になるが、OBIS内種数 (NDS<sub>o</sub>) の総数はわずか2820であった。

Table 5. 日本のEEZ内から記録されている各分類群のOBIS内種数 (NDS<sub>o</sub>) と出現種数 (NDS) に対するNDS<sub>o</sub>の割合 (PRO) .

| Phylum/Division    | NDS <sup>1</sup> | NDS <sub>o</sub> | PRO (%) |
|--------------------|------------------|------------------|---------|
| Nematoda           | 70               | 71               | 101     |
| Phoronida          | 2                | 2                | 100     |
| Priapulida         | 2                | 2                | 100     |
| Cryptophyta        | 8                | 5                | 63      |
| Annelida           | 1,076            | 529              | 49      |
| Dinomastigota      | 470              | 187              | 40      |
| Sipuncula          | 47               | 17               | 36      |
| Ectoprocta/Bryozoa | 300              | 85               | 28      |
| Cyanobacteria      | 11               | 2                | 18      |
| Hemichordata       | 11               | 2                | 18      |
| Chlorophyta        | 248              | 42               | 17      |
| Heterokontophyta   | 1,207            | 191              | 16      |
| Arthropoda         | 6,393            | 663              | 10      |
| Cnidaria           | 1,860            | 181              | 10      |
| Echiura            | 21               | 2                | 10      |
| Echinodermata      | 1,052            | 97               | 9       |
| Chaetognatha       | 36               | 3                | 8       |
| Chordata           | 4,330            | 242              | 6       |
| Brachiopoda        | 73               | 4                | 5       |
| Mollusca           | 8,658            | 415              | 5       |
| Rhodophyta         | 898              | 39               | 4       |
| Ctenophora         | 41               | 1                | 2       |
| Ciliophora         | 530              | 12               | 2       |
| Porifera           | 745              | 12               | 2       |
| Haptophyta         | 304              | 3                | 1       |
| Granuloreticulosa  | 2,321            | 11               | 0       |
|                    | Total            | 2,820            |         |

<sup>1</sup> 出現種数

## 考察 Discussion

OBISによると、現在記載されている地球上の全海洋生物種数は約230000種になる。日本近海の海洋生物総種数 (tNDS) 33629は (Table 4)、地球上の全海洋生物種数の14.6%になる。日本の領海とEEZをあわせた近海面積は4.47 x 10<sup>6</sup>km<sup>2</sup>で、これは全海洋の面積360 x 10<sup>6</sup>km<sup>2</sup>の1.2%にすぎない。また、近海容積は12 x 10<sup>6</sup>km<sup>3</sup>で、これは全海洋の1370 x 10<sup>6</sup>km<sup>3</sup>の0.9%にすぎない。つまり、日本近海は全海洋のなかで占める面積

や容積は小さいが、種の多様性は高いことがわかる。日本近海が高い種多様性を持つのは、地形、地質、物理、化学的に多様な環境があることに起因すると思われる [19, “日本近海の概要” 参照]. 他国にくらべ日本では多くの海洋生物を食料として利用してきたことから、海洋生物多様性や分布データが多数蓄積されているため、種多様性は高くなることも一因であろう。いずれにせよ、日本近海の種多様性は他の海域に比べ高いことは明確である。

2002年に日本分類学会連合は、日本の陸上・海洋における日本産生物種数調査を行った (<http://research2.kahaku.go.jp/ujssb/search>)。その評価は、日本の陸上と海洋をあわせた生物総種数は約90000としている[20]。昆虫綱が最も高い種多様性を示し、種数は約30000種と日本の全種数の1/3に達する。本研究で得られた日本近海の海洋生物総種数(33629)もまた日本の全種数の1/3に達する。日本の陸の面積 $3.78 \times 10^5 \text{ km}^2$ と近海(EEZと領海)面積 $4.47 \times 10^6 \text{ km}^2$ の比は約1:12である。単位面積 $1 \text{ km}^2$ あたりの種数を評価すると、海は $7.5 \times 10^{-3} \text{ 種/km}^2$ で陸の $2.4 \text{ 種/km}^2$ に比して著しく低いが、門の数は海の方が多し。海洋生物を対象にした分類学や生態学研究は、調査しにくいいため陸上に比べると情報が少ない。特に深海域の情報が少なく、例えば深海の熱水噴出孔生物群集からは、ここ30年間で500を超える新種が記載されている [21]。これは、陸上に比べ海洋には未記載種が多数存在し、種多様性が過小評価されていることを示唆している。つまり、今後、研究の進展に伴い海洋における種の多様性はさらに高くなることが予想される。

1981年に西村(1981)によって、日本近海の代表的な分類群について、出現種数(NDS)が評価されている [19]。それと28年後の本研究の値を比較すると、端脚目Amphipoda、ヒトデ目Asteroidea、頭足綱Cephalopoda、ヒドロ虫綱Hydrozoa、魚類Pisces、多板綱Polyplacophora、ウミグモ綱Pycnogonidaにおいて、分類学や生態学研究が進んだことでNDSは増加している (Table 6)。石灰海綿綱Calcarea、ウニ綱Echinoidea、鉢虫綱Scyphozoa、星口動物門SipunculaのNDSは1981年時と同じか少なくなっている。最近、石灰海綿綱、ウニ綱、鉢虫綱の分類学研究が日本で活動的になってきたため、近い将来これらのNDS値は増加すると思われる。しかし、星口動物門を専門とする研究者は1名しか見あたらない。

Table 6. いくつかの分類群における本研究と西村(1981) [19]のNDSの差。

| 分類群             |                |             | 西村(1981)における<br>NDS [19] | 本研究<br>の NDS | NDS の増<br>加数 <sup>2</sup> |
|-----------------|----------------|-------------|--------------------------|--------------|---------------------------|
| 門               | 綱              | 目           |                          |              |                           |
| Chordata        | Pisces         |             | 2700                     | 3790         | 1090                      |
| Cnidaria        | Hydrozoa       |             | 315                      | 523          | 208                       |
| Chordata        | Ascidiacea     |             | 281                      | 313          | 32                        |
| Echinodermata   | Ophiuroidea    |             | ca. 260                  | 308          | 48                        |
| Echinodermata   | Echinoidea     |             | 192                      | 161          | -31                       |
| Echinodermata   | Asteroidea     |             | 167                      | 280          | 113                       |
| Platyhelminthes | Polycladida    | Polycladida | 149                      | 150          | 1                         |
| Porifera        | Calcarea       |             | 130                      | 130          | 0                         |
| Mollusca        | Cephalopoda    |             | 125                      | 204          | 79                        |
| Arthropoda      | Pycnogonida    |             | 67                       | 153          | 86                        |
| Sipuncula       |                |             | 58                       | 47           | -11                       |
| Arthropoda      | Crustacea      | Amphipoda   | 57                       | 544          | 487                       |
| Mollusca        | Polyplacophora |             | 56                       | 129          | 73                        |
| Brachiopoda     |                |             | 55                       | 73           | 18                        |
| Arthropoda      | Crustacea      | Stomatopoda | 41                       | 56           | 15                        |
| Cnidaria        | Scyphozoa      |             | 38                       | 37           | -1                        |
| Echiura         |                |             | 17                       | 21           | 4                         |

<sup>1</sup> 出現種数

<sup>2</sup> 本研究と西村(1981) [19] のNDSの差

日本近海の固有種数(NES)は日本の海洋生物総種数(tNDS)の5.6%でそれほど大きな値ではない (Table S5)。海洋生物は生活史の一時期に浮遊期もしくは漂泳期を持つものが多く、固有種数は一般に多

くはならない。ただし特殊な生息域、洞窟、熱水噴出域、メタン湧出域、鯨死骸域、沈木堆積域などでは多くの固有種が報告されている [7, 22, 23]。日本近海には大きな海流があり (Figure 3), それらは海洋生物の分散を促している。例えば、黒潮は赤道域付近の種を、親潮は北東太平洋の種を日本近海に移送する [2]。古生物学的な研究から、日本近海の十脚目Decapodaやウニ綱の種は固有性が高いと言われている [19]。しかし、本研究の十脚目におけるNDSに対するNESの割合 (PES) は1.1%と低く、古生物学的な研究の結果とは一致しない。

今後出現が記録される種数 (NUS) は93門のうち30門で評価できた (Table S4)。日本近海におけるNUSの総計は121913となったが、人との係わりが少ない分類群や微小な種ではNUSの評価できなかったため、このNUSは過小評価値である。NUSの総計はtNDSの約4倍となっている。線虫動物門Nematodaでは、未記載種を含めると特に高い種多様性が指摘されている [24, 25]。本研究においても、日本近海の線虫動物門のNUSは極めて高い値を示している。このような高いNUSにもかかわらず、日本に線虫動物門を専門とする分類学研究者はわずかである。NDSよりNUSが小さい分類群は、比較的分類学研究が進んでいると思われるが、例えば、環形動物門Annelida, 節足動物門Arthropoda, 脊索動物門Chordata, 刺胞動物門Cnidaria, 顆粒根足虫門Granuloreticulosa, 軟体動物門Mollusca, 放射虫門Radiozoaの中にも適した分類形質がないために多くの隠蔽種が含まれる可能性もある。輪形動物門Rotifera, ケルコゾア門Cerczoa, 脊索動物門, シアノバクテリア門CyanobacteriaのNDSに対するNUSの割合は、それぞれ0.3%, 2.8%, 7.5%, 9.1%と低く研究進捗レベルは高いように見える。これらのうち、ケルコゾア門やシアノバクテリア門に含まれる生物種のサンプルは十分ではなく分類学研究が未着手な種も多数あるため過小評価と思われる。

魚類を含む脊索動物門は、日本近海で最も分類学研究が良く行われている分類群であるが、その中でも多数の未記載種が含まれている。特に、ハゼ科Gobiidae魚類は316の既知種に対し216の未記載種が認められる。ハゼ科魚類に未記載種が多い原因は、(1) サンプル採集が難しいこと、(2) 種同定を行うための適した形質が少ないこと、(3) 分類学研究のための研究予算が少ないことが挙げられている [26]。これらの原因は、NDSに対してNUSが高い (研究進捗レベルが低い分類群) に共通する。一方で、分類学研究が積極的に行われた結果、NDSに対してNUSが高くなった場合もある。例えば、1999年以前に28種のクダクラゲ類が日本近海から記載されていたが [27]、これらの多くは最新の分類学体系に合致しないものであった。1999年以降、分類学的再検討が行われ、日本近海から少なくとも65種のクダクラゲ類が出現し [28, 29]、少なくとも9種が未記載種となり中には属や科の新設が必要なものも認められる [28]。

船舶による貿易が増えることに伴い、世界的に外来種の問題が大きくなってきている。外来種は、在来生態系、水産業、船舶の運航、発電所に深刻な影響をもたらしている [30-33]。日本近海からは、少なくとも39種の外来種が認められたが (Table S6), 実際例として、腹足綱のカラムシロ*Nassarius sinarus* は水産業に影響し [33]、サキグロタマツメタ *Euspira fortunei* は二枚貝綱の在来アサリ*Ruditapes philippinarum* への食害が報告されている [34]。軟体動物門のイガイダマシ *Mytilopsis sallei*, ムラサキイガイ*Mytilus galloprovincialis*, ミドリイガイ*Perna viridis*, 環形動物門のカサネカンザシゴカイ *Hydroides elegans*, ナデシコカンザシゴカイ*Hydroides dianthus*, 節足動物門のタテジマフジツボ*Balanus amphitrite*, アメリカフジツボ*Balanus eburneus*は、水産養殖に被害を与えたり、船体や発電所の配水管への付着によって大きな影響を与えている。タテジマフジツボ、キタアメリカフジツボ*Balanus glandula*, チチュウカイミドリガニ*Carcinus aestuarii*, ムラサキイガイは、侵入先で在来種を駆逐している。緑色植物門のイチイヅタ*Caulerpa taxifolia*は“Killer Algae”と呼ばれ、オーストラリア沿岸のインド洋から地中海やアメリカ沿岸に移入され、在来海洋生態系に大きな影響を及ぼしているが、本種は最近日本近海でも出現が確認されていた。大型船舶のバラスト水への混入や船体付着による搬送は、主要な外来種の分散メカニズムとなっている。日本は世界有数の貿易国で、日本から持ち出されるバラスト水は世界の船舶が運ぶバラスト水の約10%を占める [32]。これは、日本から他の海域へ外来種として生物を分散させる可能性が高いことを意味する。そのようなことを少しでも避けるために、日本では2004年に特定外来生物による生態系等に係る被害の防止に関する法律 (特定外来生物法) が制定されている。

## 研究の進捗レベル State of knowledge

人との関わりが深く比較的大型の種を多く含む分類群では、分類学・生態学的研究が進んでいる傾向にあるが、日本近海にも情報が得られず不明な分類群 (Status 1) が含まれるものが多数ある (Table S3)。それらは、鉤頭動物門Acanthocephala, アメーバ動物門Amoebozoa, アピコンプレクス門Apicomplexa, 有輪動物門Cycliophora, 太陽虫門Heliozoa, 卵菌門Oomycota, オパリナ門Opalozoa, ペルコロゾア門Percolozoaで、鉤頭動物門を除けば、いずれも小型種からなる生物門である。これらの生物群は、小型であるため採集が難しい、分類学的形質が少ない、日本に専門研究者が少ない (世界的にも少ない) ため研究が進まない。最近の分子生物学や顕微鏡技術の発展は、分類学的形質が少ないことを補うことが期待されている。



近年，分子系統学研究の進展により，真核生物の高次分類群は，6つのスーパーグループに分類される傾向にある [35, 36] (Figure 7) . 例えばアメーバ動物Amoebozoaはスーパーグループの1つとなるが，太陽虫門ほどのスーパーグループに属するのかわかっていない．それぞれのスーパーグループは，いわゆる原生生物と呼ばれる小型種を多数含み，原生生物は多様な分類群にわたっていることが明らかになってきている [36]. したがって，真核生物の多様性や進化を理解するためには，これら小型生物種の系統分類を進めることが重要となる．

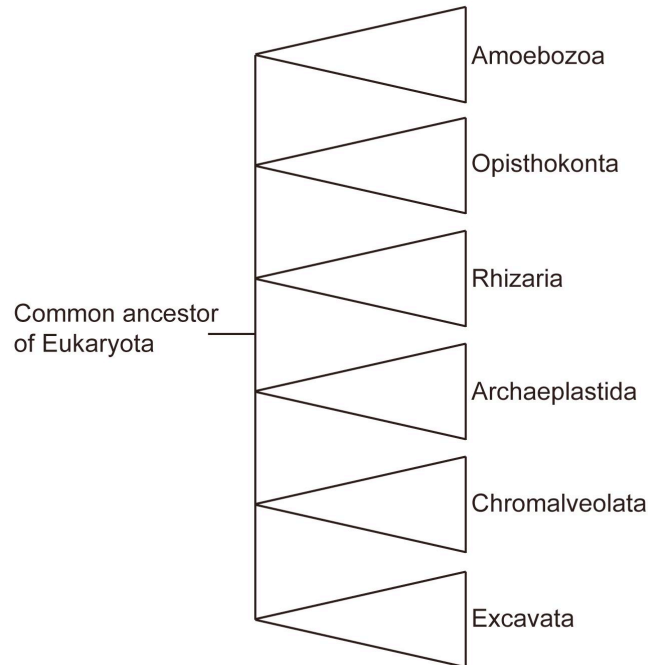

Figure 7. 分子系統解析による真核生物の6つのスーパーグループ．瀧下（2008）を改編 [36].

本研究により，日本近海には分類学・生態学の側面から見て，良く研究が進んでいる分類群からほとんど情報がないものまであることがわかった．研究の進捗レベルをよりわかりやすくするため，門レベルで以下の定義によりKnown, Mostly unknown, Unknownの3つに分けた．

- ・ **Known** : 多くの上目，下目，亜目もしくは科において研究の進捗レベルが4か5にあるもの．
- ・ **Mostly unknown** : KnownやUnknownに入らないもの．
- ・ **Unknown** : 多くの上目，下目，亜目もしくは科において研究の進捗レベルが1にあるもの．

そして，Known は22門，Mostly unknown は42門，Unknown は14門になった (Table 7) . つまり，比較的海洋生物研究が進んでいると思われた日本においても，全体的に見ると，分類学・生態学研究のデータが少ないことが示唆された．今後は，とりわけデータが少ない分類群の分類学・生態学研究者の育成が重要である．

Table 7. 門毎の分類学研究の進捗レベル (Known, Mostly unknown, Unknown) .

| 分類学研究の進捗レベル        |                 |                  |                    |
|--------------------|-----------------|------------------|--------------------|
| Known              | Mostly unknown  |                  | Unknown            |
| Acoelomorpha       | Acidobacteria   | Hemichordata     | Acanthocephala     |
| Bacteroides        | Actinobacteria  | Heterokontophyta | Amoebozoa          |
| Cercozoa           | Annelida        | Kinorhyncha      | Apicomplexa        |
| Chaetognatha       | Aquificae       | Loricifera       | Blastocladiomycota |
| Chlorophyta        | Arthropoda      | Metamonada       | Chytridiomycota    |
| Choanozoa          | Ascomycota      | Nematoda         | Cycliophora        |
| Chordata           | Basidiomycota   | Nematomorpha     | Glomeromycota      |
| Ctenophora         | Brachiopoda     | Nemertea         | Heliozoa           |
| Cyanobacteria      | Ciliophora      | Nitrospirae      | Microsporidia      |
| Dicyemida          | Cnidaria        | Orthonecta       | Oomycota           |
| Echinodermata      | Crenarchaeota   | Phoronida        | Opalozoa           |
| Ectoprocta/Bryozoa | Cryptophyta     | Placozoa         | Percolozoa         |
| Firmicutes         | Deferribacteres | Platyhelminthes  | Priapulida         |
| Granuloreticulosa  | Deinococci      | Porifera         | Thaumarchaeota     |
| Haptophyta         | Dinomastigota   | Proteobacteria   |                    |
| Labyrinthulomycota | Echiura         | Sipuncula        |                    |
| Magnoliopsida      | Entoprocta      | Tardigrade       |                    |
| Mollusca           | Euglenophyta    | Thermotogae      |                    |
| Myxozoa            | Euryarchaeota   | Verrucomicrobia  |                    |
| Radiozoa           | Gastrotricha    | Zygomycota       |                    |
| Rhodophyta         | Glaucophyta     |                  |                    |
| Rotifera           | Gnathostomulida |                  |                    |

## 日本近海の海洋生物データベース Databases concerning marine life in Japan

OBIS は、海洋生物の生物地理学、生態学、分類学、変動予測などを研究する上で強力なツールである。しかし、日本近海各分類群のOBIS内種数 (NDS<sub>0</sub>) の割合 (PRO) はわずか8.4%と低い。日本にも海洋生物の多様性や分布を扱うデータベースはあり、それらのデータとOBISを連携することで、日本を含む全海洋生物研究の進展に貢献できると思われる。以下に日本のデータベースのいくつかを示す。

- Algae resource database: <http://www.shigen.nig.ac.jp/algae/>
- 北海道海鳥センター: <http://www3.town.haboro.hokkaido.jp/seabird/>
- Biological Information System for Marine Life (BISMaL) : <http://www.godac.jp/bismal/searchSpecies.jsf>
- CMarZ-Asia Database: <http://cmarz-asia.org/db/>
- 魚類写真資料データベース: <http://research.kahaku.go.jp/zoology/photoDB/>
- 海棲哺乳類情報データベース: <http://svrsh1.kahaku.go.jp/m/mm/>
- Japan Collection of Microorganisms: <http://www.jcm.riken.jp/>
- 日本産生物種数調査: <http://research2.kahaku.go.jp/ujssb/search>
- 日本海洋データセンター: [http://www.jodc.go.jp/index\\_j.html](http://www.jodc.go.jp/index_j.html)
- NaGISA Database: <http://www.nagisa.coml.org/>
- NITE Biological Resource Center: <http://www.nbrc.nite.go.jp/>
- 日本の海藻百選: <http://research.kahaku.go.jp/botany/seaweeds/JS100Home.html>
- 原生物情報サーバ: [http://protist.i.hosei.ac.jp/protist\\_menu.html](http://protist.i.hosei.ac.jp/protist_menu.html)
- 日本爬虫類標準和名: <http://mail2.nara-edu.ac.jp/~inoue/NNM/hatyuurui/wamei-h.html>
- 日本産クマムシ類: <http://homepage3.nifty.com/cxj11255/jtard/index.html>

これらのうち、NaGISA Database, CMarZ-Asia Database, 日本海洋データセンターのデータは直接もしくは間接的にOBISに反映されている。BISMaLもOBISやGlobal Biodiversity Information Facility (GBIF) にデー

タを反映できるように国際標準フォーマットであるダーウインコアスキーマでのデータを装備している。国内データベースの多くは、日本語やダーウインコアスキーマに準じていないことが多く、容易にOBISにデータを反映することができない。このような問題を解決するために、早急にOBISの日本ノードを整備する必要がある。

日本近海の生物多様性や生態系は、(1) 天然水産資源の減少、(2) 水産養殖の増加、(3) 特定漁獲種の変化、(4) 漁業海域の変化、(5) 食物網の変化、(6) 個体群・種・遺伝子レベルでの多様性の変化、(7) 種や個体群の絶滅、(8) 分布域の縮小拡大といった変化、(9) 生物分散に関わる輸送様式の変化、(10) 外来種の侵入、(11) 栄養循環の変化、(12) 表層における生物生産や海底への炭素フラックスの変化などに関し変動することが予想される。しかし、我々は海洋生態系のサービスや機能を十分理解するための基礎データを十分に得ていない。日本近海でも、深海域のように未調査領域がたくさん残っている。日本は、海洋国家であり海洋生物の調査研究を行うには適した地理環境にある。とりわけ、日本は海溝やトラフといった深海環境にも囲まれ、深海生物研究のための有人潜水調査船、無人探査機、自律型無人探査機といったファシリティも運用している。2007年からは、統合国際深海掘削計画 (IODP) のもとに、地球深部探査船「ちきゅう」が活動をはじめた。IODPの目的の1つは、海底下の生物圏探査であり、海底下の生物多様性や生態系の研究は未着手領域である。このように、日本は海洋生物研究を推進する環境にあり、今後海洋生物の理解のために積極的に研究を行う必要がある。

## 謝辞 Acknowledgments

本研究はTable S2に挙げた多数の研究者の方からの情報を基に行った。また、「海洋生物のセンサス」から多大な支援があり、特にMichele DuRand博士, Patricia Miloslavich博士, Dale Langford博士, Charles Griffiths博士には有益な助言をいただいた。古島靖夫博士には作図を助けていただき、丸山正博士には多岐にわたる支援をいただいた。これらの方々には心より感謝する。

## 引用文献 References

1. Costello MJ, Bouchet P, Emblow CS, Legakis A (2006) European marine biodiversity inventory and taxonomic resources: state of the art and gaps in knowledge. *Mar Eco Prog Ser* 316: 257-268.
2. 沖山宗雄・鈴木克美 (1985) 日本の海洋生物. 東京: 東海大学出版会. 160 p.
3. 日本海洋学会沿岸海洋研究部会 (1985) 日本全国沿岸海洋誌. 東京, 東海大学出版会. 1106 p.
4. 米倉 伸之・野上 道男・貝塚 爽平・鎮西 清高 (2001) 日本の地形 (1) 総説. 東京: 東京大学出版会. 376 p.
5. Su JL, Guan BX, Jiang JZ (1990) The Kuroshio. Part I. Physical Features. *Oceanogr Mar Biol Annu Rev* 28: 11-71.
6. Kojima S (2002) Deep-sea chemoautosynthesis-based communities in the Northwestern Pacific. *J Oceanogr* 58: 343-363.
7. 藤倉克則・奥谷喬司・丸山正 (2008) 潜水調査船が観た深海生物. 秦野: 東海大学出版会. 487 p.
8. 馬場菊太郎 (1949) 相模湾産後鰓類図譜. 東京: 岩波書店. 194 p.
9. 時岡隆 (1953) 相模湾産海鞘類図譜. 東京: 岩波書店. 315 p.
10. 酒井恒 (1965) 相模湾産蟹類. 東京: 丸善. 206 p.
11. 江口元起 (1968) 相模湾産ヒドロ珊瑚類および石珊瑚類. 東京: 丸善. 197 p.
12. 黒田徳米・波部忠重・大山桂 (1971) 相模湾産貝類. 東京: 丸善. 489 p.
13. 林良二 (1973) 相模湾産海星類. 東京: 保育社. 239 p.
14. 三宅貞祥 (1978) 相模湾産甲殻異尾類. 東京: 保育社. 200 p.
15. 入村精一 (1982) 相模湾産蛇尾類. 東京: 丸善. 95 p.
16. 重井陸夫 (1986) 相模湾産海胆類. 東京: 丸善. 204 p.
17. 中村光一郎 (1987) 相模湾産海蜘蛛類. 東京: 丸善. 43 p.
18. 谷田専治 (1989) 相模湾産尋常海綿類. 東京: 丸善. 197 p.
19. 西村三郎 (1981) 地球の海と生命. 東京: 海鳴社. 284 p.
20. 柘原宏 (2004) 日本分類学会連合による日本産生物種数調査. *生物科学* 55: 71-77.
21. Desbruyères D, Segonzac M, Bright M (2006) Handbook of deep-sea hydrothermal vent fauna. Linz-Dornach: *Densia* 18, 544 p.
22. Van Dover CL (2000) The ecology of deep-sea hydrothermal vents. Princeton: Princeton University Press, 424 p.

23. Hayami I, Kase T (1996) Characteristics of submarine cave bivalves in the northwestern Pacific. *Am Malac Bull* 12: 59-65.
24. Lamshead PJD (1993) Recent developments in marine benthic biodiversity research. *Oceanus* 19: 5-24
25. Lamshead PJD, Boucher G (2003) Marine nematode deep-sea biodiversity - Hyperdiverse or hype? *Jour Biogeogr* 30: 475-485.
26. 松浦啓一・瀬能宏 (2004) 日本に魚は何種いるのか ―既知種と未知種をめぐる問題―. *生物科学* 55: 79-86.
27. 千原光雄・村野正昭 (1997) 日本産海洋プランクトン検索図説. 東京：東海大学出版会. 1574 p.
28. ドゥーグル リンズィー・三宅裕志 (2009) 日本近海に出現する中・深層性刺胞動物ならびに有櫛動物の目録. *月刊海洋* 53: 417-438.
29. Kitamura M, Tanaka Y, Ishimaru T (2003) Coarse scale distribution and community structure of hydromedusae related to water mass structure in two locations of Japanese waters in early summer. *Plankton Biol Ecol* 50: 43-54.
30. 西栄二郎・加藤哲哉 (2004) 環形動物多毛類の移入と移出の現状. *日本ベントス学会誌* 59: 83-95.
31. 岩崎敬二・木村妙子・木下今日子・山口寿之・西川輝昭ほか (2004) 日本における海産生物の人為的移入と分散：日本ベントス学会自然保全委員会によるアンケート調査の結果から. *日本ベントス学会誌* 59: 22-44.
32. 大谷道夫 (2004) 日本の海洋移入生物とその移入過程について. *日本ベントス学会誌* 59: 45-57.
33. 福田宏 (2004) 外来種と同定の問題. *日本ベントス学会誌* 59: 68-73.
34. 大越健嗣 (2004) 移入アサリに混入して移入する生物―食害生物サキグロタマツメタと非意図的移入種. *日本ベントス学会誌* 59: 74-82.
35. Adl SM, Simpson AGB, Farmer MA, Andersen RA, Anderson OR et al. (2005) The new higher level classification of eukaryotes with emphasis on the taxonomy of protists. *J Eukaryot Microbio* 52: 367-376.
36. 瀧下清貴 (2008) 化学合成生態系における深海微生物-真核生物の本当の多様性-. In: 藤倉克則・奥谷喬司・丸山正 編, 潜水調査船が観た深海生物. 秦野：東海大学出版会. pp. 204-206.

Table S1. 日本における海洋生物研究史概要.

| Year      | Item                                                                                                                                                                                                                  | Reference                                                                                                   |
|-----------|-----------------------------------------------------------------------------------------------------------------------------------------------------------------------------------------------------------------------|-------------------------------------------------------------------------------------------------------------|
| 1709      | Ekiken Kaibara (Japan): Published as a Yamato Honzo (concerning Japanese fauna and flora)                                                                                                                             | <a href="http://www.ndl.go.jp/nature/varie/varie_2.html">http://www.ndl.go.jp/nature/varie/varie_2.html</a> |
| 1741      | Gensen Kanda (Japan): Published as a Nitto-Gyofu, the first marine animal monographs in Japan                                                                                                                         | <a href="http://www.ndl.go.jp/nature/varie/varie_2.html">http://www.ndl.go.jp/nature/varie/varie_2.html</a> |
| 1833-1850 | Wilhem De Haan (Nederland): Published as Fauna Japonica (Crustacea), 8 Volumes, from Rijksmuseum van Natuurlijke Historie                                                                                             |                                                                                                             |
| 1842-1850 | Coenraad J. Temminck and Hermann Schlegel (Nederland): Published as Fauna Japonica (Pisces), 16 Volumes, from Rijksmuseum van Natuurlijke Historie                                                                    |                                                                                                             |
| 1871      | Establishment of a Museum in Yushima Seido as part of the observational facilities of the Ministry of Education Museum Division (Present NMNS <sup>1</sup> )                                                          |                                                                                                             |
| 1873-1876 | Franz Hilgendorf (German): Professor of natural history in Tokyo Medical School. Faunal study of Marine organisms                                                                                                     |                                                                                                             |
| 1875      | Oceanographic investigation by the HMS <i>Challenger</i> around Japan                                                                                                                                                 |                                                                                                             |
| 1877-1879 | Edward S. Morse (USA): Professor of the University of Tokyo. Establishment of the first Marine Laboratory in Enoshima Island, Kanagawa in 1877                                                                        | 国立科学博物館 (2007) 相模湾動物誌. 秦野: 東海大学出版会. 212 p.                                                                  |
| 1879-1881 | Ludwig. H. P. Döderlein (German): Professor of natural history in The University of Tokyo Faculty of Medicine. Faunal study of Sagami Bay                                                                             | 国立科学博物館 (2007) 相模湾動物誌. 秦野: 東海大学出版会. 212 p.                                                                  |
| 1886      | Establishment of Misaki Marine Biological Station, The University of Tokyo, in Misaki, Kanagawa                                                                                                                       |                                                                                                             |
| 1888      | Establishment of the Fisheries Training School (Present TUMSAT <sup>2</sup> )                                                                                                                                         |                                                                                                             |
| 1904-1905 | Franz Doflein (German): Deep-sea biological investigation in Sagami Bay                                                                                                                                               | 国立科学博物館 (2007) 相模湾動物誌. 秦野: 東海大学出版会. 212 p.                                                                  |
| 1922      | Establishment of a Marine Biological Research Station of the Faculty of Science, Kyoto Imperial University (Present Seto Marine Biological Laboratory, Field Science Education and Research Center, Kyoto University) |                                                                                                             |
| 1922-1930 | Fishery investigation in continental shelf around Japan by the Imperial Fisheries Institute                                                                                                                           |                                                                                                             |
| 1925      | Establishment of a Biological Laboratory, Imperial Household. Twelve marine organism monographs in Sagami Bay                                                                                                         |                                                                                                             |
| 1925      | Start of investigations using Research Vessel Soyo-Maru by the Imperial Fisheries Institute                                                                                                                           |                                                                                                             |
| 1929      | Start of investigations (mainly fisheries science) using human-occupied vehicle <i>Nishimura-shiki Mame Sensui-tei ichi-go</i> , maximum depth 200 m                                                                  |                                                                                                             |
| 1929      | The Fisheries Experimental Station of the Ministry of Agriculture and Forestry was established in Tokyo (Present NRIFS <sup>3</sup> )                                                                                 |                                                                                                             |

|           |                                                                                                                                                                      |  |
|-----------|----------------------------------------------------------------------------------------------------------------------------------------------------------------------|--|
| 1932      | Establishment of the Japanese Society of Fisheries Science                                                                                                           |  |
| 1941      | Establishment of the Oceanographic Society of Japan                                                                                                                  |  |
| 1951-1958 | Start of investigations using human-occupied vehicle <i>Kuroshio-go</i> , maximum depth 200 m. "Marine Snow" termed during this human-occupied vehicle investigation |  |
| 1962      | Establishment of the ORI <sup>4</sup> , The University of Tokyo                                                                                                      |  |
| 1963      | Research Vessel <i>Tansei-maru</i> was completed by ORI <sup>4</sup> , The University of Tokyo                                                                       |  |
| 1967      | Research Vessel <i>Hakuho-maru</i> was completed by ORI <sup>4</sup> , The University of Tokyo                                                                       |  |
| 1971      | Establishment of the Japan Marine Science and Technology Center (JAMSTEC <sup>5</sup> , present Japan Agency for Marine-Earth Science and Technology)                |  |
| 1973-     | The National Survey on the Natural Environment by the Ministry of the Environment                                                                                    |  |
| 1981      | Human-occupied vehicle <i>Shinkai 2000</i> was completed by JAMSTEC <sup>5</sup>                                                                                     |  |
| 1984      | Discovery of deep-sea chemosynthesis-based community in Sagami Bay. This was the first discovery of chemosynthesis-based community around Japan                      |  |
| 1986-     | Investigation of endangered species in Japan by the Ministry of the Environment                                                                                      |  |
| 1989      | Human-occupied vehicle <i>Shinkai 6500</i> was completed by JAMSTEC <sup>5</sup>                                                                                     |  |
| 1993      | Conclusion of Convention on Biological Diversity                                                                                                                     |  |
| 2001      | Establishment of Global Biodiversity Information Facility Japan                                                                                                      |  |
| 2002      | Japanese Biota Species Number Survey by Union of Japanese Societies for Systematic Biology                                                                           |  |
| 2007      | Establishment of the law "Basic Act on Ocean Policy"                                                                                                                 |  |

<sup>1, 2, 3, 4, 5</sup> 略語説明は Table 2 参照.

Table S2. 本研究への協力研究者リスト.

| 分類群      |                   | 協力者 (研究機関 <sup>1</sup> )                                                                                                                                                |
|----------|-------------------|-------------------------------------------------------------------------------------------------------------------------------------------------------------------------|
| Archaea  |                   | 山本啓之 (JAMSTEC)                                                                                                                                                          |
| Bacteria |                   | 能木裕一 (JAMSTEC), 山本啓之 (JAMSTEC)                                                                                                                                          |
| Eukarya  | Acoelomorpha      | 田近謙一 (日本大学)                                                                                                                                                             |
|          | Ascomycota        | 長濱統彦 (JAMSTEC)                                                                                                                                                          |
|          | Annelida          | 西栄二郎 (YNU)                                                                                                                                                              |
|          | Arthropoda        | 福岡弘紀 (SNF), Mark J. Grygier (LBM), 岩崎望 (高知大学), 駒井智幸 (NHMIC), 長澤和也 (広島大学), 中村光一郎, 大塚攻 (広島大学), 遠部卓 (広島大学), 齋藤暢宏 (水土舎), 澤本彰三 (東海大学), 下村通誉 (KMNH), 上田拓史 (高知大学), 山口寿之 (千葉大学) |
|          | Basidiomycota     | 長濱統彦 (JAMSTEC)                                                                                                                                                          |
|          | Brachiopoda       | 柁原宏 (北海道大学)                                                                                                                                                             |
|          | Cercozoa          | 鈴木紀毅 (東北大学)                                                                                                                                                             |
|          | Chaetognatha      | 後藤太一郎 (三重大学), 黒田一紀 (JSNFR)                                                                                                                                              |
|          | Chlorophyta       | 田中次郎 (TUMSAT), 鈴木秀和 (TUMSAT)                                                                                                                                            |
|          | Chordata          | 甲能 直樹 (NMNS), 松浦啓一 (NMNS), 村山司 (東海大学), 西川淳 (東京大学), 志賀直信 (HJC)                                                                                                           |
|          | Ciliophora        | 中町美和 (TNFRI)                                                                                                                                                            |
|          | Cnidaria          | 今原幸光 (BIK), 久保田信 (Kyoto University), 野村恵一 (KMPC), 立川浩之 (NHMIC), 柳研介 (NHMIC)                                                                                             |
|          | Ctenophora        | 堀田拓史, 峯水亮 (峯水写真事務所)                                                                                                                                                     |
|          | Dicyemida         | 古屋秀隆 (大阪大学)                                                                                                                                                             |
|          | Dinophyta         | 田中次郎 (TUMSAT), 鈴木秀和 (TUMSAT)                                                                                                                                            |
|          | Echinodermata     | 藤田敏彦 (NMNS)                                                                                                                                                             |
|          | Ectoprocta        | 柁原宏 (北海道大学)                                                                                                                                                             |
|          | Entoprocta        | 伊勢戸徹 (JAMSTEC)                                                                                                                                                          |
|          | Glaucophyta       | 田中次郎 (TUMSAT), 鈴木秀和 (TUMSAT)                                                                                                                                            |
|          | Granuloreticulosa | 長谷川四郎 (熊本大学)                                                                                                                                                            |
|          | Haptophyta        | 河地正伸 (NIES)                                                                                                                                                             |
|          | Magnoliopsida     | 田中次郎 (TUMSAT), 鈴木秀和 (TUMSAT)                                                                                                                                            |
|          | Metamonada        | 雪吹直史 (UBC)                                                                                                                                                              |
|          | Mollusca          | 奥谷喬司 (JAMSTEC), 齋藤寛 (NMNS)                                                                                                                                              |
|          | Myxozoa           | 横山博 (東京大学)                                                                                                                                                              |
|          | Nemertea          | 柁原宏 (北海道大学)                                                                                                                                                             |
|          | Ochrophyta        | 田中次郎 (TUMSAT), 鈴木秀和 (TUMSAT)                                                                                                                                            |
|          | Oomycota          | 稲葉重樹 (NITE)                                                                                                                                                             |
|          | Orthonecta        | 古屋秀隆 (大阪大学)                                                                                                                                                             |
|          | Phoronida         | 柁原宏 (北海道大学)                                                                                                                                                             |
|          | Placozoa          | 柁原宏 (北海道大学)                                                                                                                                                             |
|          | Platyhelminthes   | 田近謙一 (日本大学)                                                                                                                                                             |
|          | Porifera          | 伊勢優史 (東京大学)                                                                                                                                                             |
|          | Radiozoa          | 鈴木紀毅 (東北大学)                                                                                                                                                             |
|          | Rhodophyta        | 田中次郎 (TUMSAT), 鈴木秀和 (TUMSAT)                                                                                                                                            |
|          | Streptophyta      | 田中次郎 (TUMSAT), 鈴木秀和 (TUMSAT)                                                                                                                                            |

<sup>1</sup> 略語説明は Table 2 参照.

Table S3. 分類階級目レベルの日本近海における海洋生物の出現種数（NDS），研究進捗レベル，固有種数（NES），今後出現が記録される種数（NUS），推定種数（ENS），外来種数（NIS），分類学研究者数，種同定に役立つ文献数．目レベルに分類することができない分類群については，上目，下目，亜目もしくは科レベルとした．

| ドメイン/界/スーパーグループ | 門               | 綱               | 目/上目/下目/亜目/科             | NDS | 研究進捗レベル | NES | NUS | ENS | NIS | 分類学研究者数（氏名：所属 <sup>1)</sup> ）                              | 種同定に役立つ文献数 | 引用                                                                                                                                                                                                                                                                                                                                                                                                                                                                                                                                                                              |
|-----------------|-----------------|-----------------|--------------------------|-----|---------|-----|-----|-----|-----|------------------------------------------------------------|------------|---------------------------------------------------------------------------------------------------------------------------------------------------------------------------------------------------------------------------------------------------------------------------------------------------------------------------------------------------------------------------------------------------------------------------------------------------------------------------------------------------------------------------------------------------------------------------------|
| Archaea         |                 |                 |                          | 9   |         | ND  | ND  | 9   | 0   | 10 (Yoichi Kamagata: AIST, Ken Takai: JAMSTEC et al.)      | >10        | <a href="http://www.jcm.riken.jp/">http://www.jcm.riken.jp/</a> ,<br><a href="http://www.nbrc.nite.go.jp/e/index.html">http://www.nbrc.nite.go.jp/e/index.html</a> ,<br><a href="http://ijs.sgmjournals.org">http://ijs.sgmjournals.org</a> ,<br><a href="http://www.bacterio.cict.fr/">http://www.bacterio.cict.fr/</a>                                                                                                                                                                                                                                                        |
|                 | Crenarchaeota   |                 |                          | 2   | 3       | ND  | ND  | 2   | 0   |                                                            |            |                                                                                                                                                                                                                                                                                                                                                                                                                                                                                                                                                                                 |
|                 | Euryarchaeota   |                 |                          | 7   | 3       | ND  | ND  | 7   | 0   |                                                            |            |                                                                                                                                                                                                                                                                                                                                                                                                                                                                                                                                                                                 |
|                 | Thaumarchaeota  |                 |                          | ND  | 1       | ND  | ND  | ND  | 0   |                                                            |            |                                                                                                                                                                                                                                                                                                                                                                                                                                                                                                                                                                                 |
| Bacteria        |                 |                 |                          | 843 |         | ND  | 1   | 844 | 0   | 15 (Shigeaki Harayama: NITE, Yuichi Nogi: JAMSTEC, et al.) | >10        | <a href="http://www.jcm.riken.jp/">http://www.jcm.riken.jp/</a> ,<br><a href="http://www.nbrc.nite.go.jp/e/index.html">http://www.nbrc.nite.go.jp/e/index.html</a> ,<br><a href="http://ijs.sgmjournals.org/">http://ijs.sgmjournals.org/</a> ,<br><a href="http://www.bacterio.cict.fr/">http://www.bacterio.cict.fr/</a> , <a href="http://www.ncbi.nlm.nih.gov/Taxonomy/Browser/wwwtax.cgi?id=2">http://www.ncbi.nlm.nih.gov/Taxonomy/Browser/wwwtax.cgi?id=2</a> ,<br><a href="http://www.nbrp.jp/report/reportProject.jsp">http://www.nbrp.jp/report/reportProject.jsp</a> |
|                 | Acidobacteria   |                 |                          | 3   |         | ND  | ND  | 3   | 0   |                                                            |            |                                                                                                                                                                                                                                                                                                                                                                                                                                                                                                                                                                                 |
|                 |                 | Acidobacteria   |                          | 1   |         | ND  | ND  | 1   | 0   |                                                            |            |                                                                                                                                                                                                                                                                                                                                                                                                                                                                                                                                                                                 |
|                 |                 |                 | Acidobacteriales         | 1   | 3       | ND  | ND  | 1   | 0   |                                                            |            |                                                                                                                                                                                                                                                                                                                                                                                                                                                                                                                                                                                 |
|                 |                 | Holophagae      |                          | 2   |         | ND  | ND  | 2   | 0   |                                                            |            |                                                                                                                                                                                                                                                                                                                                                                                                                                                                                                                                                                                 |
|                 |                 |                 | Acanthopleuribacteraceae | 1   | 3       | ND  | ND  | 1   | 0   |                                                            |            |                                                                                                                                                                                                                                                                                                                                                                                                                                                                                                                                                                                 |
|                 |                 |                 | Holophagales             | 1   | 3       | ND  | ND  | 1   | 0   |                                                            |            |                                                                                                                                                                                                                                                                                                                                                                                                                                                                                                                                                                                 |
|                 | Actinobacteria  |                 |                          | 123 |         | ND  | ND  | 123 | 0   |                                                            |            |                                                                                                                                                                                                                                                                                                                                                                                                                                                                                                                                                                                 |
|                 |                 | Actinobacteria  |                          | 123 |         | ND  | ND  | 123 | 0   |                                                            |            |                                                                                                                                                                                                                                                                                                                                                                                                                                                                                                                                                                                 |
|                 |                 |                 | Acidimicrobiale          | 1   | 3       | ND  | ND  | 1   | 0   |                                                            |            |                                                                                                                                                                                                                                                                                                                                                                                                                                                                                                                                                                                 |
|                 |                 |                 | Actinomycetales          | 121 | 5       | ND  | ND  | 121 | 0   |                                                            |            |                                                                                                                                                                                                                                                                                                                                                                                                                                                                                                                                                                                 |
|                 |                 |                 | Bifidobacteriales        | 1   | 3       | ND  | ND  | 1   | 0   |                                                            |            |                                                                                                                                                                                                                                                                                                                                                                                                                                                                                                                                                                                 |
|                 | Aquificae       |                 |                          | 2   |         | ND  | ND  | 2   | 0   |                                                            |            |                                                                                                                                                                                                                                                                                                                                                                                                                                                                                                                                                                                 |
|                 |                 | Aquificae       |                          | 2   |         | ND  | ND  | 2   | 0   |                                                            |            |                                                                                                                                                                                                                                                                                                                                                                                                                                                                                                                                                                                 |
|                 |                 |                 | Aquificales              | 2   | 3       | ND  | ND  | 2   | 0   |                                                            |            |                                                                                                                                                                                                                                                                                                                                                                                                                                                                                                                                                                                 |
|                 | Bacteroides     |                 |                          | 125 |         | ND  | ND  | 125 | 0   |                                                            |            |                                                                                                                                                                                                                                                                                                                                                                                                                                                                                                                                                                                 |
|                 |                 | Bacteroidia     |                          | 2   |         | ND  | ND  | 2   | 0   |                                                            |            |                                                                                                                                                                                                                                                                                                                                                                                                                                                                                                                                                                                 |
|                 |                 |                 | Bacteroidales            | 2   | 3       | ND  | ND  | 2   | 0   |                                                            |            |                                                                                                                                                                                                                                                                                                                                                                                                                                                                                                                                                                                 |
|                 |                 | Flavobacteria   |                          | 83  |         | ND  | ND  | 83  | 0   |                                                            |            |                                                                                                                                                                                                                                                                                                                                                                                                                                                                                                                                                                                 |
|                 |                 |                 | Flavobacteriales         | 83  | 4       | ND  | ND  | 83  | 0   |                                                            |            |                                                                                                                                                                                                                                                                                                                                                                                                                                                                                                                                                                                 |
|                 |                 | Sphingobacteria |                          | 40  |         | ND  | ND  | 40  | 0   |                                                            |            |                                                                                                                                                                                                                                                                                                                                                                                                                                                                                                                                                                                 |
|                 |                 |                 | Sphingobacteriales       | 40  | 4       | ND  | ND  | 40  | 0   |                                                            |            |                                                                                                                                                                                                                                                                                                                                                                                                                                                                                                                                                                                 |
|                 | Cyanobacteria   |                 |                          | 11  | 5       | ND  | 1   | 12  | 0   |                                                            |            |                                                                                                                                                                                                                                                                                                                                                                                                                                                                                                                                                                                 |
|                 | Deferribacteres |                 |                          | 1   |         | ND  | ND  | 1   | 0   |                                                            |            |                                                                                                                                                                                                                                                                                                                                                                                                                                                                                                                                                                                 |
|                 |                 | Deferribacteres |                          | 1   |         | ND  | ND  | 1   | 0   |                                                            |            |                                                                                                                                                                                                                                                                                                                                                                                                                                                                                                                                                                                 |



|  |                |                       |     |   |    |    |     |   |  |  |
|--|----------------|-----------------------|-----|---|----|----|-----|---|--|--|
|  |                | Deferribacterales     | 1   | 3 | ND | ND | 1   | 0 |  |  |
|  | Deinococci     |                       | 1   |   | ND | ND | 1   | 0 |  |  |
|  |                | Deinococci            | 1   |   | ND | ND | 1   | 0 |  |  |
|  |                | Deinococcales         | 1   | 3 | ND | ND | 1   | 0 |  |  |
|  | Firmicutes     |                       | 172 |   | ND | ND | 172 | 0 |  |  |
|  |                | Bacilli               | 172 |   | ND | ND | 172 | 0 |  |  |
|  |                | Bacillales            | 159 | 5 | ND | ND | 159 | 0 |  |  |
|  |                | Lactobacillales       | 13  | 4 | ND | ND | 13  | 0 |  |  |
|  | Nitrospirae    |                       | 2   |   | ND | ND | 2   | 0 |  |  |
|  |                | Nitrospira            | 2   |   | ND | ND | 2   | 0 |  |  |
|  |                | Nitrospirales         | 2   | 3 | ND | ND | 2   | 0 |  |  |
|  | Proteobacteria |                       | 395 |   | ND | ND | 395 | 0 |  |  |
|  |                | Alphaproteobacteria   | 78  |   | ND | ND | 78  | 0 |  |  |
|  |                | Caulobacterales       | 4   | 3 | ND | ND | 4   | 0 |  |  |
|  |                | Rhizobiales           | 18  | 4 | ND | ND | 18  | 0 |  |  |
|  |                | Rhodobacterales       | 41  | 4 | ND | ND | 41  | 0 |  |  |
|  |                | Sphingomonadales      | 15  | 4 | ND | ND | 15  | 0 |  |  |
|  |                | Betaproteobacteria    | 4   |   | ND | ND | 4   | 0 |  |  |
|  |                | Burkholderiales       | 2   | 3 | ND | ND | 2   | 0 |  |  |
|  |                | Neisseriales          | 2   | 3 | ND | ND | 2   | 0 |  |  |
|  |                | Deltaproteobacteria   | 7   |   | ND | ND | 7   | 0 |  |  |
|  |                | Desulfobacterales     | 2   | 3 | ND | ND | 2   | 0 |  |  |
|  |                | Desulfovibrionales    | 2   | 3 | ND | ND | 2   | 0 |  |  |
|  |                | Desulfuromonadales    | 2   | 3 | ND | ND | 2   | 0 |  |  |
|  |                | Myxococcales          | 1   | 3 | ND | ND | 1   | 0 |  |  |
|  |                | Epsilonproteobacteria | 10  |   | ND | ND | 10  | 0 |  |  |
|  |                | Campylobacterales     | 4   | 3 | ND | ND | 4   | 0 |  |  |
|  |                | Nautiliales           | 2   | 3 | ND | ND | 2   | 0 |  |  |
|  |                | incertae sedis        | 4   | 3 | ND | ND | 4   | 0 |  |  |
|  |                | Gammaaproteobacteria  | 296 |   | ND | ND | 296 | 0 |  |  |
|  |                | Aeromonadales         | 3   | 3 | ND | ND | 3   | 0 |  |  |
|  |                | Alteromonadales       | 91  | 4 | ND | ND | 91  | 0 |  |  |
|  |                | Chromatiales          | 2   | 3 | ND | ND | 2   | 0 |  |  |
|  |                | Enterobacteriales     | 8   | 3 | ND | ND | 8   | 0 |  |  |
|  |                | Legionellales         | 3   | 3 | ND | ND | 3   | 0 |  |  |
|  |                | Oceanospirillales     | 53  | 4 | ND | ND | 53  | 0 |  |  |
|  |                | Pseudomonadales       | 58  | 4 | ND | ND | 58  | 0 |  |  |

|                   |                             |                         |                    |       |   |    |    |       |    |                                                  |                                                                                                                      |
|-------------------|-----------------------------|-------------------------|--------------------|-------|---|----|----|-------|----|--------------------------------------------------|----------------------------------------------------------------------------------------------------------------------|
|                   |                             |                         | Thiotrichales      | 6     | 3 | ND | ND | 6     | 0  |                                                  |                                                                                                                      |
|                   |                             |                         | Vibrionales        | 63    | 4 | ND | ND | 63    | 0  |                                                  |                                                                                                                      |
|                   |                             |                         | Xanthomonadales    | 4     | 3 | ND | ND | 4     | 0  |                                                  |                                                                                                                      |
|                   |                             |                         | incertae sedis     | 5     | 3 | ND | ND | 5     | 0  |                                                  |                                                                                                                      |
|                   | Thermotogae                 |                         |                    | 4     |   | ND | ND | 4     | 0  |                                                  |                                                                                                                      |
|                   |                             | Thermotogae             |                    | 4     |   | ND | ND | 4     | 0  |                                                  |                                                                                                                      |
|                   |                             |                         | Thermotogales      | 4     | 3 | ND | ND | 4     | 0  |                                                  |                                                                                                                      |
|                   | Verrucomicrobia             |                         |                    | 4     |   | ND | ND | 4     | 0  |                                                  |                                                                                                                      |
|                   |                             | Verrucomicrobiae        |                    | 4     |   | ND | ND | 4     | 0  |                                                  |                                                                                                                      |
|                   |                             |                         | Verrucomicrobiales | 4     | 3 | ND | ND | 4     | 0  |                                                  |                                                                                                                      |
| Eukarya/Chromista |                             |                         |                    | 1,247 |   | ND | ND | 1,247 | 1  | 2 (Hidekazu Suzuki: TUMSAT, Jiro Tanaka: TUMSAT) |                                                                                                                      |
|                   | Heterokontophyta/Ochrophyta |                         |                    | 1,207 |   | ND | ND | 1,207 | 1  |                                                  |                                                                                                                      |
|                   |                             | Bacillariophyceae       |                    | 862   |   | ND | ND | 862   | ND | 3                                                | 千原光雄・村野正昭 (1997) 日本産海洋プランクトン検索図説. 東京: 東海大学出版会. 1574 p., 小林弘・出井雅彦・真山茂樹・南雲保・長田敬五 (2006) 小林弘珪藻図鑑 第1巻. 東京: 内田老鶴圃. 596 p. |
|                   |                             |                         | Centrales          | 425   | 5 | ND | ND | 425   | ND |                                                  |                                                                                                                      |
|                   |                             |                         | Pennales           | 437   | 5 | ND | ND | 437   | ND |                                                  |                                                                                                                      |
|                   |                             | Chrysomerothyceae       |                    | 2     |   | ND | ND | 2     | ND | >3                                               | 千原光雄・村野正昭 (1997) 日本産海洋プランクトン検索図説. 東京: 東海大学出版会. 1574 p., 小林弘・出井雅彦・真山茂樹・南雲保・長田敬五 (2006) 小林弘珪藻図鑑 第1巻. 東京: 内田老鶴圃. 596 p. |
|                   |                             |                         | Chrysomeridales    | 2     | 3 | ND | ND | 2     | ND |                                                  |                                                                                                                      |
|                   |                             | Chrysophyceae           |                    | 5     |   | ND | ND | 5     | 0  |                                                  |                                                                                                                      |
|                   |                             |                         | Chromulinales      | 5     | 3 | ND | ND | 5     | 0  |                                                  |                                                                                                                      |
|                   |                             | Dictyochophyceae        |                    | 9     |   | ND | ND | 9     | ND |                                                  |                                                                                                                      |
|                   |                             |                         | Ciliophryales      | 1     | 3 | ND | ND | 1     | ND |                                                  |                                                                                                                      |
|                   |                             |                         | Dictyochales       | 5     | 3 | ND | ND | 5     | ND |                                                  |                                                                                                                      |
|                   |                             |                         | Pedinellales       | 2     | 3 | ND | ND | 2     | ND |                                                  |                                                                                                                      |
|                   |                             |                         | incertae sedis     | 1     | 3 | ND | ND | 1     | ND |                                                  |                                                                                                                      |
|                   |                             | Eustigmatophyceae       |                    | 5     |   | ND | ND | 5     | ND |                                                  |                                                                                                                      |
|                   |                             |                         | Eustigmatales      | 5     | 3 | ND | ND | 5     | ND |                                                  |                                                                                                                      |
|                   |                             | Pelagophyceae           |                    | 3     |   | ND | ND | 3     | ND |                                                  |                                                                                                                      |
|                   |                             |                         | Sarinochrysidales  | 3     | 3 | ND | ND | 3     | ND |                                                  |                                                                                                                      |
|                   |                             | Phaeophyceae/Phaeophyta |                    | 304   |   | ND | ND | 304   | ND |                                                  |                                                                                                                      |
|                   |                             |                         | Chordariales       | 54    | 4 | ND | ND | 54    | ND |                                                  |                                                                                                                      |

|                 |                            |                |                    |       |   |    |    |       |    |                                                  |    |                                                                                                     |
|-----------------|----------------------------|----------------|--------------------|-------|---|----|----|-------|----|--------------------------------------------------|----|-----------------------------------------------------------------------------------------------------|
|                 |                            |                | Cutleriales        | 3     | 3 | ND | ND | 3     | ND |                                                  |    |                                                                                                     |
|                 |                            |                | Desmarestiales     | 3     | 3 | ND | ND | 3     | ND |                                                  |    |                                                                                                     |
|                 |                            |                | Dictyosiphonales   | 25    | 4 | ND | ND | 25    | ND |                                                  |    |                                                                                                     |
|                 |                            |                | Dictyotales        | 39    | 4 | ND | ND | 39    | ND |                                                  |    |                                                                                                     |
|                 |                            |                | Ectocarpales       | 24    | 4 | ND | ND | 24    | ND |                                                  |    |                                                                                                     |
|                 |                            |                | Fucales            | 69    | 4 | ND | ND | 69    | ND |                                                  |    |                                                                                                     |
|                 |                            |                | Laminariales       | 39    | 4 | ND | ND | 39    | ND |                                                  |    |                                                                                                     |
|                 |                            |                | Ralfsiales         | 17    | 4 | ND | ND | 17    | ND |                                                  |    |                                                                                                     |
|                 |                            |                | Scytosiphonales    | 17    | 4 | ND | ND | 17    | ND |                                                  |    |                                                                                                     |
|                 |                            |                | Sphacelariales     | 10    | 4 | ND | ND | 10    | ND |                                                  |    |                                                                                                     |
|                 |                            |                | Sporochnales       | 3     | 3 | ND | ND | 3     | ND |                                                  |    |                                                                                                     |
|                 |                            |                | Syringodermatales  | 1     | 3 | ND | ND | 1     | ND |                                                  |    |                                                                                                     |
|                 |                            | Pinguiphyceae  |                    | 1     |   | ND | ND | 1     | ND |                                                  |    |                                                                                                     |
|                 |                            |                | Pinguiochrysidales | 1     | 3 | ND | ND | 1     | ND |                                                  |    |                                                                                                     |
|                 |                            | Raphidophyceae |                    | 15    |   | ND | ND | 15    | ND |                                                  |    |                                                                                                     |
|                 |                            |                | Raphidomonadales   | 15    | 4 | ND | ND | 15    | ND |                                                  |    |                                                                                                     |
|                 |                            | Xanthophyceae  |                    | 1     |   | ND | ND | 1     | 1  |                                                  |    |                                                                                                     |
|                 |                            |                | Vaucheriales       | 1     | 3 | ND | ND | 1     | 1  |                                                  |    |                                                                                                     |
|                 | Labyrinthulomycota         |                |                    | 40    | 4 | ND | ND | 40    | 0  | 2                                                | ND | 杉山純多 (2005) 菌類・細菌・ウイルスの多様性と系統. 東京: 裳華房. 492 p.                                                      |
|                 | Oomycota                   |                |                    | ND    | 1 | ND | ND | ND    | ND | 1 (Shigeki Inaba: NITE)                          |    | <a href="http://research2.kahaku.go.jp/ujssb/search">http://research2.kahaku.go.jp/ujssb/search</a> |
|                 | Opalozoa                   |                |                    | ND    | 1 | ND | ND | ND    | ND | ND                                               |    |                                                                                                     |
| Eukarya/Plantae |                            |                |                    | 1,195 |   | ND | ND | 1,195 | 1  | 2 (Jiro Tanaka: TUMSAT, Hidekazu Suzuki: TUMSAT) | >3 | <a href="http://research2.kahaku.go.jp/ujssb/search">http://research2.kahaku.go.jp/ujssb/search</a> |
|                 | Angiospermae/Magnoliopsida |                |                    | 44    |   | ND | ND | 44    | ND |                                                  |    |                                                                                                     |
|                 |                            | Liliopsida     |                    | 44    |   | ND | ND | 44    | ND |                                                  |    |                                                                                                     |
|                 |                            |                | Najadales          | 44    | 4 | ND | ND | 44    | ND |                                                  |    |                                                                                                     |
|                 | Chlorophyta                |                |                    | 248   |   | ND | ND | 248   | 1  |                                                  |    |                                                                                                     |
|                 |                            | Chlorophyceae  |                    | 2     |   | ND | ND | 2     | 0  |                                                  |    |                                                                                                     |
|                 |                            |                | Chlamydomonadales  | 1     | 3 | ND | ND | 1     | 0  |                                                  |    |                                                                                                     |
|                 |                            |                | Chlorococcales     | 1     | 3 | ND | ND | 1     | 0  |                                                  |    |                                                                                                     |
|                 |                            | Ulvophyceae    |                    | 246   |   | ND | ND | 246   | 1  |                                                  |    |                                                                                                     |
|                 |                            |                | Caulerpales        | 86    | 4 | ND | ND | 86    | 1  |                                                  |    |                                                                                                     |
|                 |                            |                | Cladophorales      | 86    | 4 | ND | ND | 86    | 0  |                                                  |    |                                                                                                     |
|                 |                            |                | Dasycladales       | 16    | 4 | ND | ND | 16    | 0  |                                                  |    |                                                                                                     |
|                 |                            |                | Ulotrichales       | 27    | 4 | ND | ND | 27    | 0  |                                                  |    |                                                                                                     |
|                 |                            |                | Ulvales            | 31    | 4 | ND | ND | 31    | 0  |                                                  |    |                                                                                                     |

|                            |                |                     |                   |       |   |     |     |       |   |  |  |  |
|----------------------------|----------------|---------------------|-------------------|-------|---|-----|-----|-------|---|--|--|--|
|                            | Glaucophyta    |                     |                   | 4     |   | ND  | ND  | 4     | 0 |  |  |  |
|                            |                | Glaucophyceae       |                   | 4     |   | ND  | ND  | 4     | 0 |  |  |  |
|                            |                |                     | Cyanophorales     | 3     | 3 | ND  | ND  | 3     | 0 |  |  |  |
|                            |                |                     | Glaucocystales    | 1     | 3 | ND  | ND  | 1     | 0 |  |  |  |
|                            | Rhodophyta     |                     |                   | 898   |   | ND  | ND  | 898   | 0 |  |  |  |
|                            |                | Bangiophyceae       |                   | 42    |   | ND  | ND  | 42    | 0 |  |  |  |
|                            |                |                     | Bangiales         | 30    | 4 | ND  | ND  | 30    | 0 |  |  |  |
|                            |                |                     | Compsopogonales   | 5     | 3 | ND  | ND  | 5     | 0 |  |  |  |
|                            |                |                     | Erythropeltidales | 7     | 3 | ND  | ND  | 7     | 0 |  |  |  |
|                            |                | Cyanidiophyceae     |                   | 2     |   | ND  | ND  | 2     | 0 |  |  |  |
|                            |                |                     | Cyanidiales       | 2     | 3 | ND  | ND  | 2     | 0 |  |  |  |
|                            |                | Florideophyceae     |                   | 841   |   | ND  | ND  | 841   | 0 |  |  |  |
|                            |                |                     | Acrochaetiales    | 37    | 4 | ND  | ND  | 37    | 0 |  |  |  |
|                            |                |                     | Ahnfeltiales      | 1     | 3 | ND  | ND  | 1     | 0 |  |  |  |
|                            |                |                     | Batrachospermales | 27    | 4 | ND  | ND  | 27    | 0 |  |  |  |
|                            |                |                     | Bonnemaisoniales  | 4     | 3 | ND  | ND  | 4     | 0 |  |  |  |
|                            |                |                     | Ceramiales        | 320   | 5 | ND  | ND  | 320   | 0 |  |  |  |
|                            |                |                     | Corallinales      | 106   | 5 | ND  | ND  | 106   | 0 |  |  |  |
|                            |                |                     | Gelidiales        | 27    | 4 | ND  | ND  | 27    | 0 |  |  |  |
|                            |                |                     | Gigartinales      | 127   | 5 | ND  | ND  | 127   | 0 |  |  |  |
|                            |                |                     | Gracilariales     | 22    | 4 | ND  | ND  | 22    | 0 |  |  |  |
|                            |                |                     | Halymeniales      | 38    | 4 | ND  | ND  | 38    | 0 |  |  |  |
|                            |                |                     | Hildenbrandiales  | 3     | 3 | ND  | ND  | 3     | 0 |  |  |  |
|                            |                |                     | Nemaliales        | 56    | 4 | ND  | ND  | 56    | 0 |  |  |  |
|                            |                |                     | Nemastomatales    | 11    | 4 | ND  | ND  | 11    | 0 |  |  |  |
|                            |                |                     | Palmales          | 11    | 4 | ND  | ND  | 11    | 0 |  |  |  |
|                            |                |                     | Plocamiales       | 5     | 3 | ND  | ND  | 5     | 0 |  |  |  |
|                            |                |                     | Rhodymeniales     | 43    | 4 | ND  | ND  | 43    | 0 |  |  |  |
|                            |                |                     | Thoreaales        | 3     | 3 | ND  | ND  | 3     | 0 |  |  |  |
|                            |                | Rhodellophyceae     |                   | 13    |   | ND  | ND  | 13    | 0 |  |  |  |
|                            |                |                     | Goniotrichales    | 8     | 3 | ND  | ND  | 8     | 0 |  |  |  |
|                            |                |                     | Porphyridiales    | 5     | 3 | ND  | ND  | 5     | 0 |  |  |  |
|                            | incertae sedis |                     |                   | 1     |   | ND  | ND  | 1     | 0 |  |  |  |
|                            |                | Mesostigmatophyceae |                   | 1     |   | ND  | ND  | 1     | 0 |  |  |  |
|                            |                |                     | Mesostigmatales   | 1     | 3 | ND  | ND  | 1     | 0 |  |  |  |
| Eukarya/Protista           |                |                     |                   | 4,201 |   | 383 | 594 | 4,795 | 0 |  |  |  |
| Eukarya/Protista/Alveolata |                |                     |                   | 1,000 |   | ND  | ND  | 1,000 | 0 |  |  |  |

|  |                                        |                  |                     |     |   |    |    |     |   |                                                     |    |                                                                                                                                                                                                                    |
|--|----------------------------------------|------------------|---------------------|-----|---|----|----|-----|---|-----------------------------------------------------|----|--------------------------------------------------------------------------------------------------------------------------------------------------------------------------------------------------------------------|
|  | Apicomplexa                            |                  |                     | ND  |   | ND | ND | ND  | 0 | ND                                                  | ND |                                                                                                                                                                                                                    |
|  |                                        | Sporozoea        |                     | ND  | 1 | ND | ND | ND  | 0 |                                                     |    |                                                                                                                                                                                                                    |
|  | Ciliophora                             |                  |                     | 530 |   | ND | ND | 530 | 0 | 4 (Miwa Nakamachi: TNFRI, Takashi Ota: ISU, et al.) | 1  | <a href="http://protist.i.hosei.ac.jp/protist_menu.html">http://protist.i.hosei.ac.jp/protist_menu.html</a> ,<br><a href="http://www.jodc.go.jp/data/biology_j.html">http://www.jodc.go.jp/data/biology_j.html</a> |
|  |                                        | Heterotrichea    |                     | 16  |   | ND | ND | 16  | 0 |                                                     |    |                                                                                                                                                                                                                    |
|  |                                        |                  | Heterotrichida      | 10  | 4 | ND | ND | 10  | 0 |                                                     |    |                                                                                                                                                                                                                    |
|  |                                        |                  | Licinophorida       | 1   | 3 | ND | ND | 1   | 0 |                                                     |    |                                                                                                                                                                                                                    |
|  |                                        |                  | Plagiotomida        | 1   | 3 | ND | ND | 1   | 0 |                                                     |    |                                                                                                                                                                                                                    |
|  |                                        |                  | Peritromida         | 4   | 3 | ND | ND | 4   | 0 |                                                     |    |                                                                                                                                                                                                                    |
|  |                                        | Karyorelictea    |                     | 6   |   | ND | ND | 6   | 0 |                                                     |    |                                                                                                                                                                                                                    |
|  |                                        |                  | Loxodida            | 2   | 3 | ND | ND | 2   | 0 |                                                     |    |                                                                                                                                                                                                                    |
|  |                                        |                  | Protostomatida      | 3   | 3 | ND | ND | 3   | 0 |                                                     |    |                                                                                                                                                                                                                    |
|  |                                        |                  | Protoheterotrichida | 1   | 3 | ND | ND | 1   | 0 |                                                     |    |                                                                                                                                                                                                                    |
|  |                                        | Litostomatea     |                     | 14  |   | ND | ND | 14  | 0 |                                                     |    |                                                                                                                                                                                                                    |
|  |                                        |                  | Haptorida           | 8   | 3 | ND | ND | 8   | 0 |                                                     |    |                                                                                                                                                                                                                    |
|  |                                        |                  | Pleurostomatida     | 6   | 3 | ND | ND | 6   | 0 |                                                     |    |                                                                                                                                                                                                                    |
|  |                                        | Nassophorea      |                     | 15  |   | ND | ND | 15  | 0 |                                                     |    |                                                                                                                                                                                                                    |
|  |                                        |                  | Nassulida           | 7   | 3 | ND | ND | 7   | 0 |                                                     |    |                                                                                                                                                                                                                    |
|  |                                        |                  | Synhymeniida        | 8   | 3 | ND | ND | 8   | 0 |                                                     |    |                                                                                                                                                                                                                    |
|  |                                        | Oligohymenophora |                     | 34  |   | ND | ND | 34  | 0 |                                                     |    |                                                                                                                                                                                                                    |
|  |                                        |                  | Hymenostomatida     | 3   | 3 | ND | ND | 3   | 0 |                                                     |    |                                                                                                                                                                                                                    |
|  |                                        |                  | Mobilida            | 2   | 3 | ND | ND | 2   | 0 |                                                     |    |                                                                                                                                                                                                                    |
|  |                                        |                  | Sessilida           | 7   | 3 | ND | ND | 7   | 0 |                                                     |    |                                                                                                                                                                                                                    |
|  |                                        |                  | Peniculida          | 6   | 3 | ND | ND | 6   | 0 |                                                     |    |                                                                                                                                                                                                                    |
|  |                                        |                  | Scuticocilatida     | 15  | 4 | ND | ND | 15  | 0 |                                                     |    |                                                                                                                                                                                                                    |
|  |                                        |                  | Plagiopylida        | 1   | 3 | ND | ND | 1   | 0 |                                                     |    |                                                                                                                                                                                                                    |
|  |                                        | Phyllopharyngea  |                     | 11  |   | ND | ND | 11  | 0 |                                                     |    |                                                                                                                                                                                                                    |
|  |                                        |                  | Cyrtophorida        | 11  | 4 | ND | ND | 11  | 0 |                                                     |    |                                                                                                                                                                                                                    |
|  |                                        | Prostomatea      |                     | 6   |   | ND | ND | 6   | 0 |                                                     |    |                                                                                                                                                                                                                    |
|  |                                        |                  | Prorodontida        | 6   | 3 | ND | ND | 6   | 0 |                                                     |    |                                                                                                                                                                                                                    |
|  |                                        | Spirotrichea     |                     | 428 |   | ND | ND | 428 | 0 |                                                     |    |                                                                                                                                                                                                                    |
|  |                                        |                  | Choreotrichida      | 349 | 5 | ND | ND | 349 | 0 |                                                     |    |                                                                                                                                                                                                                    |
|  |                                        |                  | Stichotrichida      | 6   | 3 | ND | ND | 6   | 0 |                                                     |    |                                                                                                                                                                                                                    |
|  |                                        |                  | Oligotrichida       | 63  | 4 | ND | ND | 63  | 0 |                                                     |    |                                                                                                                                                                                                                    |
|  |                                        |                  | Euplotida           | 9   | 3 | ND | ND | 9   | 0 |                                                     |    |                                                                                                                                                                                                                    |
|  |                                        |                  | Armophorida         | 1   | 3 | ND | ND | 1   | 0 |                                                     |    |                                                                                                                                                                                                                    |
|  | Dinomastigota/Dinoflagellata/Dinophyta |                  |                     | 470 |   | ND | ND | 470 | 0 | 4 (Jiro Tanaka: TUMSAT, Hidekazu Suzuki: TUMSAT, et | >1 | 千原光雄・村野正昭 (1997) 日本産海洋プランクトン検索図説. 東京: 東海                                                                                                                                                                           |

|                                     |              |                  |                   |     |   |    |    |     |    |                                                                                   |    |                                                                                                                            |
|-------------------------------------|--------------|------------------|-------------------|-----|---|----|----|-----|----|-----------------------------------------------------------------------------------|----|----------------------------------------------------------------------------------------------------------------------------|
|                                     |              |                  |                   |     |   |    |    |     |    | al.)                                                                              |    | 大学出版会. 1574 p.                                                                                                             |
|                                     |              | Dinophyceae      |                   | 461 |   | ND | ND | 461 | 0  |                                                                                   |    |                                                                                                                            |
|                                     |              |                  | Dinophysiales     | 57  | 4 | ND | ND | 57  | 0  |                                                                                   |    |                                                                                                                            |
|                                     |              |                  | Gonyaulacales     | 124 | 5 | ND | ND | 124 | 0  |                                                                                   |    |                                                                                                                            |
|                                     |              |                  | Gymnodiniales     | 86  | 4 | ND | ND | 86  | 0  |                                                                                   |    |                                                                                                                            |
|                                     |              |                  | Kolkwitiellales   | 1   | 3 | ND | ND | 1   | 0  |                                                                                   |    |                                                                                                                            |
|                                     |              |                  | Peridinales       | 166 | 5 | ND | ND | 166 | 0  |                                                                                   |    |                                                                                                                            |
|                                     |              |                  | Phytodinales      | 2   | 3 | ND | ND | 2   | 0  |                                                                                   |    |                                                                                                                            |
|                                     |              |                  | Prorocentrales    | 24  | 4 | ND | ND | 24  | 0  |                                                                                   |    |                                                                                                                            |
|                                     |              |                  | Thoracosphaerales | 1   | 3 | ND | ND | 1   | 0  |                                                                                   |    |                                                                                                                            |
|                                     |              | Noctilciphyceae  |                   | 9   |   | ND | ND | 9   | 0  |                                                                                   |    |                                                                                                                            |
|                                     |              |                  | Noctilcales       | 9   | 3 | ND | ND | 9   | 0  |                                                                                   |    |                                                                                                                            |
| Eukarya/Protista/A<br>moebobiota    |              |                  |                   | ND  |   | ND | ND | ND  | ND | ND                                                                                | ND |                                                                                                                            |
|                                     | Amoebozoa    |                  |                   | ND  | 1 | ND | ND | ND  | ND |                                                                                   |    |                                                                                                                            |
| Eukarya/Protista/Ch<br>romalveolata |              |                  |                   | 312 |   | 0  | ND | 312 | 0  |                                                                                   |    |                                                                                                                            |
|                                     | Cryptophyta  |                  |                   | 8   |   | ND | ND | 8   | 0  | 1 (Mayumi Erata: Global<br>Environmental Forum)                                   | >1 | 千原光雄・村野正昭 (1997) 日本産海<br>洋プランクトン検索図説. 東京: 東海<br>大学出版会. 1574 p.                                                             |
|                                     |              | Cryptophyceae    |                   | 8   |   | ND | ND | 8   | 0  |                                                                                   |    |                                                                                                                            |
|                                     |              |                  | Cryptomonadales   | 8   | 3 | ND | ND | 8   | 0  |                                                                                   |    |                                                                                                                            |
|                                     | Haptophyta   |                  |                   | 304 |   | 0  | ND | 304 | 0  | 5 (Masanobu Kawachi: NIES,<br>Takeshi Nakayama: University<br>of Tsukuba, et al.) | 10 | Jordan RW, Cros L, Young JR (2004) A<br>revised classification scheme for living<br>haptophytes. Micropaleontol 50: 55-79. |
|                                     |              | Pavlovophyceae   |                   | 11  |   | 0  | ND | 11  | 0  |                                                                                   |    |                                                                                                                            |
|                                     |              |                  | Pavlovales        | 11  | 4 | 0  | ND | 11  | 0  |                                                                                   |    |                                                                                                                            |
|                                     |              | Prymnesiophyceae |                   | 293 |   | 0  | ND | 293 | 0  |                                                                                   |    |                                                                                                                            |
|                                     |              |                  | Coccolithales     | 26  | 4 | 0  | ND | 26  | 0  |                                                                                   |    |                                                                                                                            |
|                                     |              |                  | Isochrysidales    | 20  | 4 | 0  | ND | 20  | 0  |                                                                                   |    |                                                                                                                            |
|                                     |              |                  | Phaeocystidales   | 9   | 3 | 0  | ND | 9   | 0  |                                                                                   |    |                                                                                                                            |
|                                     |              |                  | Prymnesiales      | 71  | 4 | 0  | ND | 71  | 0  |                                                                                   |    |                                                                                                                            |
|                                     |              |                  | Syracosphaerales  | 99  | 4 | 0  | ND | 99  | 0  |                                                                                   |    |                                                                                                                            |
|                                     |              |                  | Zygodiscales      | 67  | 4 | 0  | ND | 67  | 0  |                                                                                   |    |                                                                                                                            |
|                                     |              |                  | incertae sedis    | 1   | 3 | 0  | ND | 1   | 0  |                                                                                   |    |                                                                                                                            |
| Eukarya/Protista/Ex<br>cavata       |              |                  |                   | 20  |   | ND | ND | 20  | 0  |                                                                                   |    |                                                                                                                            |
|                                     | Euglenophyta |                  |                   | 14  |   | ND | ND | 14  | 0  | 1 (Minoru Saito: YNU)                                                             | 1  | 千原光雄・村野正昭 (1997) 日本産海<br>洋プランクトン検索図説. 東京: 東海<br>大学出版会. 1574 p.                                                             |
|                                     |              | Euglenophyceae   |                   | 14  |   | ND | ND | 14  | 0  |                                                                                   |    |                                                                                                                            |
|                                     |              |                  | Euglenales        | 8   | 3 | ND | ND | 8   | 0  |                                                                                   |    |                                                                                                                            |

|                           |                   |              |                  |       |   |     |     |       |   |                                                                                      |    |                                                                                                                                                                                                                                                                                   |
|---------------------------|-------------------|--------------|------------------|-------|---|-----|-----|-------|---|--------------------------------------------------------------------------------------|----|-----------------------------------------------------------------------------------------------------------------------------------------------------------------------------------------------------------------------------------------------------------------------------------|
|                           |                   |              | Eutreptiales     | 6     | 3 | ND  | ND  | 6     | 0 |                                                                                      |    |                                                                                                                                                                                                                                                                                   |
|                           | Metamonada        |              |                  | 6     |   | ND  | ND  | 6     | 0 | 2 (Naoji Yubuki: UBC, Kiyotaka Takishita: JAMSTEC)                                   | 0  |                                                                                                                                                                                                                                                                                   |
|                           |                   |              | Carpodiemonadida | 3     | 3 | ND  | ND  | 3     | 0 |                                                                                      |    |                                                                                                                                                                                                                                                                                   |
|                           |                   |              | Diplomonadida    | 1     | 3 | ND  | ND  | 1     | 0 |                                                                                      |    |                                                                                                                                                                                                                                                                                   |
|                           |                   |              | Retortamonadida  | 1     | 3 | ND  | ND  | 1     | 0 |                                                                                      |    |                                                                                                                                                                                                                                                                                   |
|                           |                   |              | Trichomonadida   | 1     | 3 | ND  | ND  | 1     | 0 |                                                                                      |    |                                                                                                                                                                                                                                                                                   |
|                           | Percolozoa        |              |                  | ND    | 1 | ND  | ND  | ND    | 0 | ND                                                                                   | ND |                                                                                                                                                                                                                                                                                   |
| Eukarya/Protista/Rhizaria |                   |              |                  | 2,869 |   | 383 | 594 | 3,463 | 0 |                                                                                      |    |                                                                                                                                                                                                                                                                                   |
|                           | Cercozoa          |              |                  | 143   |   | ND  | 4   | 147   | 0 | 1 (Kozo Takahashi: Kyushu University)                                                | 5  | Takahashi K, Anderson OR (2000) Class Phaeodaria. In: Lee JJ, Leedale GF, Bradbury P, editors. An Illustrated Guide to the Protozoa (2nd edition) . Organisms traditionally referred to as Protozoa, or newly discovered groups. Kansas: Society of Protozoologists. pp. 981-994. |
|                           |                   |              | Phaeodaria       | 143   | 5 | ND  | 4   | 147   | 0 |                                                                                      |    |                                                                                                                                                                                                                                                                                   |
|                           | Granuloreticulosa |              |                  | 2,321 |   | 383 | 490 | 2,811 | 0 | 5 (Shiro Hasegawa: Kumamoto University, Yasumochi Matoba: SFL, et al.)               | 6  | Nomura R (1987) List of recent benthic foraminifera reported from the seas around the Japanese Islands, 1982-1997. Mem Fac Edu, Shimane Univ, Nat Sci 31: 1-25.                                                                                                                   |
|                           |                   | Foraminifera |                  | 2,321 |   | 383 | 490 | 2,811 | 0 |                                                                                      |    |                                                                                                                                                                                                                                                                                   |
|                           |                   |              | Allogromiina     | 2     | 3 | 0   | 1   | 3     | 0 |                                                                                      |    |                                                                                                                                                                                                                                                                                   |
|                           |                   |              | Carterinina      | 1     | 5 | 0   | 0   | 1     | 0 |                                                                                      |    |                                                                                                                                                                                                                                                                                   |
|                           |                   |              | Globigerinina    | 47    | 5 | 0   | 4   | 51    | 0 |                                                                                      |    |                                                                                                                                                                                                                                                                                   |
|                           |                   |              | Involutinina     | 4     | 5 | 1   | 0   | 4     | 0 |                                                                                      |    |                                                                                                                                                                                                                                                                                   |
|                           |                   |              | Lagenina         | 404   | 5 | 72  | 66  | 470   | 0 |                                                                                      |    |                                                                                                                                                                                                                                                                                   |
|                           |                   |              | Miliolina        | 340   | 5 | 33  | 77  | 417   | 0 |                                                                                      |    |                                                                                                                                                                                                                                                                                   |
|                           |                   |              | Robertinida      | 19    | 4 | 4   | 6   | 25    | 0 |                                                                                      |    |                                                                                                                                                                                                                                                                                   |
|                           |                   |              | Rotaliina        | 989   | 5 | 204 | 189 | 1,178 | 0 |                                                                                      |    |                                                                                                                                                                                                                                                                                   |
|                           |                   |              | Spirillinina     | 15    | 5 | 0   | 3   | 18    | 0 |                                                                                      |    |                                                                                                                                                                                                                                                                                   |
|                           |                   |              | Textulariina     | 500   | 5 | 69  | 144 | 644   | 0 |                                                                                      |    |                                                                                                                                                                                                                                                                                   |
|                           | Radiozoa          |              |                  | 405   |   | ND  | 100 | 505   | 0 |                                                                                      | 35 |                                                                                                                                                                                                                                                                                   |
|                           |                   | Acantharea   |                  | 66    |   | ND  | ND  | 66    | 0 | 0                                                                                    | 10 | Bernstein RE, Kling SK, Boltovskoy D (1999) Acantharia. In: Boltovskoy E, editor. South Atlantic zooplankton. Leiden: Backhuys Publishers. pp. 75-147.                                                                                                                            |
|                           |                   |              | Arthracanthida   | 51    | 4 | ND  | ND  | 51    | 0 |                                                                                      |    |                                                                                                                                                                                                                                                                                   |
|                           |                   |              | Chaunacanthida   | 3     | 3 | ND  | ND  | 3     | 0 |                                                                                      |    |                                                                                                                                                                                                                                                                                   |
|                           |                   |              | Holacanthida     | 4     | 3 | ND  | ND  | 4     | 0 |                                                                                      |    |                                                                                                                                                                                                                                                                                   |
|                           |                   |              | Symphyacanthida  | 8     | 3 | ND  | ND  | 8     | 0 |                                                                                      |    |                                                                                                                                                                                                                                                                                   |
|                           |                   | Polycystinea |                  | 338   |   | ND  | 100 | 438   | 0 | 5 (Noritoshi Suzuki: Tohoku University, Atsushi Matsuoka: Niigata University et al.) | 20 | Itaki T (2009) Late glacial to Holocene Polycystine radiolarians from the Japan Sea, Special Volume. News Osaka Micropaleontol 14: 43-89.                                                                                                                                         |

|                                 |            |                                        |                   |     |   |    |    |     |    |                                                      |   |                                                                                                                                                                                                                                                                                                                                                                                                                |
|---------------------------------|------------|----------------------------------------|-------------------|-----|---|----|----|-----|----|------------------------------------------------------|---|----------------------------------------------------------------------------------------------------------------------------------------------------------------------------------------------------------------------------------------------------------------------------------------------------------------------------------------------------------------------------------------------------------------|
|                                 |            |                                        | Collodaria        | 31  | 4 | ND | 20 | 51  | 0  |                                                      |   |                                                                                                                                                                                                                                                                                                                                                                                                                |
|                                 |            |                                        | Entactinaria      | 25  | 4 | ND | 20 | 45  | 0  |                                                      |   |                                                                                                                                                                                                                                                                                                                                                                                                                |
|                                 |            |                                        | Nassellaria       | 168 | 5 | ND | 20 | 188 | 0  |                                                      |   |                                                                                                                                                                                                                                                                                                                                                                                                                |
|                                 |            |                                        | Spumellaria       | 114 | 5 | ND | 40 | 154 | 0  |                                                      |   |                                                                                                                                                                                                                                                                                                                                                                                                                |
|                                 |            | incertae sedis                         |                   | 1   |   | ND | 0  | 1   | 0  | 0                                                    |   | 1                                                                                                                                                                                                                                                                                                                                                                                                              |
|                                 |            |                                        | Taxopodia         | 1   | 5 | ND | 0  | 1   | 0  |                                                      |   |                                                                                                                                                                                                                                                                                                                                                                                                                |
| Eukarya/Protista/incertae sedis |            |                                        |                   | ND  |   | ND | ND | ND  | ND | ND                                                   |   | ND                                                                                                                                                                                                                                                                                                                                                                                                             |
|                                 | Heliozoa   |                                        |                   | ND  | 1 | ND | ND | ND  | ND |                                                      |   |                                                                                                                                                                                                                                                                                                                                                                                                                |
| Eukarya/Fungi/Opisthokonta      |            |                                        |                   | 367 |   | ND | ND | 367 | 0  | 2 (Takahiko Nagahama: JAMSTEC, Akira Nakagiri: NITE) | 3 | Benson, D. A., Karsch-Mizrachi, I., Lipman, D. J., Ostell, J., & Wheeler, D. L. (2008). GenBank. Nucleic Acids Research, 36(Database issue), D25-30. doi: 10.1093/nar/gkm929., <a href="http://www.cbs.knaw.nl/databases/">http://www.cbs.knaw.nl/databases/</a> , <a href="http://www.nbrc.nite.go.jp/NBRC2/NBRCDispSearchServlet?lang=en">http://www.nbrc.nite.go.jp/NBRC2/NBRCDispSearchServlet?lang=en</a> |
|                                 | Ascomycota |                                        |                   | 294 |   | ND | ND | 294 | 0  |                                                      |   |                                                                                                                                                                                                                                                                                                                                                                                                                |
|                                 |            | Dothideomycetes                        |                   | 38  |   | ND | ND | 38  | 0  |                                                      |   |                                                                                                                                                                                                                                                                                                                                                                                                                |
|                                 |            |                                        | Capnodiales       | 2   | 3 | ND | ND | 2   | 0  |                                                      |   |                                                                                                                                                                                                                                                                                                                                                                                                                |
|                                 |            |                                        | Dothideales       | 2   | 3 | ND | ND | 2   | 0  |                                                      |   |                                                                                                                                                                                                                                                                                                                                                                                                                |
|                                 |            |                                        | Pleosporales      | 31  | 4 | ND | ND | 31  | 0  |                                                      |   |                                                                                                                                                                                                                                                                                                                                                                                                                |
|                                 |            |                                        | Tubeufiaceae      | 3   | 3 | ND | ND | 3   | 0  |                                                      |   |                                                                                                                                                                                                                                                                                                                                                                                                                |
|                                 |            | Dothideomycetes et Chaetothyriomycetes |                   | 6   |   | ND | ND | 6   | 0  |                                                      |   |                                                                                                                                                                                                                                                                                                                                                                                                                |
|                                 |            |                                        | Cucurbitariaceae  | 3   | 3 | ND | ND | 3   | 0  |                                                      |   |                                                                                                                                                                                                                                                                                                                                                                                                                |
|                                 |            |                                        | Dothioraceae      | 3   | 3 | ND | ND | 3   | 0  |                                                      |   |                                                                                                                                                                                                                                                                                                                                                                                                                |
|                                 |            | Eurotiomycetes                         |                   | 30  |   | ND | ND | 30  | 0  |                                                      |   |                                                                                                                                                                                                                                                                                                                                                                                                                |
|                                 |            |                                        | Chaetothyriales   | 4   | 3 | ND | ND | 4   | 0  |                                                      |   |                                                                                                                                                                                                                                                                                                                                                                                                                |
|                                 |            |                                        | Eurotiales        | 22  | 4 | ND | ND | 22  | 0  |                                                      |   |                                                                                                                                                                                                                                                                                                                                                                                                                |
|                                 |            |                                        | Onygenales        | 4   | 3 | ND | ND | 4   | 0  |                                                      |   |                                                                                                                                                                                                                                                                                                                                                                                                                |
|                                 |            | Lecanoromycetes                        |                   | 1   |   | ND | ND | 1   | 0  |                                                      |   |                                                                                                                                                                                                                                                                                                                                                                                                                |
|                                 |            |                                        | Lecanorales       | 1   | 3 | ND | ND | 1   | 0  |                                                      |   |                                                                                                                                                                                                                                                                                                                                                                                                                |
|                                 |            | Leotiomycetes                          |                   | 24  |   | ND | ND | 24  | 0  |                                                      |   |                                                                                                                                                                                                                                                                                                                                                                                                                |
|                                 |            |                                        | Helotiales        | 18  | 4 | ND | ND | 18  | 0  |                                                      |   |                                                                                                                                                                                                                                                                                                                                                                                                                |
|                                 |            |                                        | Myxotrichaceae    | 1   | 3 | ND | ND | 1   | 0  |                                                      |   |                                                                                                                                                                                                                                                                                                                                                                                                                |
|                                 |            |                                        | Pseudeurotiaceae  | 5   | 3 | ND | ND | 5   | 0  |                                                      |   |                                                                                                                                                                                                                                                                                                                                                                                                                |
|                                 |            | Orbiliomycetes                         |                   | 1   |   | ND | ND | 1   | 0  |                                                      |   |                                                                                                                                                                                                                                                                                                                                                                                                                |
|                                 |            |                                        | Orbiliales        | 1   | 3 | ND | ND | 1   | 0  |                                                      |   |                                                                                                                                                                                                                                                                                                                                                                                                                |
|                                 |            | Saccharomycetes                        |                   | 47  |   | ND | ND | 47  | 0  |                                                      |   |                                                                                                                                                                                                                                                                                                                                                                                                                |
|                                 |            |                                        | Saccharomycetales | 47  | 4 | ND | ND | 47  | 0  |                                                      |   |                                                                                                                                                                                                                                                                                                                                                                                                                |
|                                 |            | Sordariomycetes                        |                   | 138 |   | ND | ND | 138 | 0  |                                                      |   |                                                                                                                                                                                                                                                                                                                                                                                                                |



|  |               |                      |    |   |    |    |    |   |  |  |
|--|---------------|----------------------|----|---|----|----|----|---|--|--|
|  |               | Chaetosphaeriales    | 1  | 3 | ND | ND | 1  | 0 |  |  |
|  |               | Diaporthales         | 1  | 3 | ND | ND | 1  | 0 |  |  |
|  |               | Halosphaeriales      | 43 | 4 | ND | ND | 43 | 0 |  |  |
|  |               | Hypocreales          | 26 | 4 | ND | ND | 26 | 0 |  |  |
|  |               | Hypocreomycetidae    | 3  | 3 | ND | ND | 3  | 0 |  |  |
|  |               | Lulworthiales        | 9  | 3 | ND | ND | 9  | 0 |  |  |
|  |               | Melanosporales       | 2  | 3 | ND | ND | 2  | 0 |  |  |
|  |               | Microascales         | 19 | 4 | ND | ND | 19 | 0 |  |  |
|  |               | Phyllachorales       | 2  | 3 | ND | ND | 2  | 0 |  |  |
|  |               | Sordariales          | 12 | 4 | ND | ND | 12 | 0 |  |  |
|  |               | Xylariales           | 16 | 4 | ND | ND | 16 | 0 |  |  |
|  |               | Apiosporaceae        | 4  | 3 | ND | ND | 4  | 0 |  |  |
|  |               | incertae sedis       | 9  |   | ND | ND | 9  | 0 |  |  |
|  |               | “Dematiaceae”        | 3  | 3 | ND | ND | 3  | 0 |  |  |
|  |               | “Myxotrichaceae”     | 1  | 3 | ND | ND | 1  | 0 |  |  |
|  |               | “Hyphomycetes”       | 5  | 3 | ND | ND | 5  | 0 |  |  |
|  | Basidiomycota |                      | 65 |   | ND | ND | 65 | 0 |  |  |
|  |               | Agaricomycetes       | 6  |   | ND | ND | 6  | 0 |  |  |
|  |               | Agaricales           | 2  | 3 | ND | ND | 2  | 0 |  |  |
|  |               | Auriculariales       | 1  | 3 | ND | ND | 1  | 0 |  |  |
|  |               | Polyporales          | 2  | 3 | ND | ND | 2  | 0 |  |  |
|  |               | Russulales           | 1  | 3 | ND | ND | 1  | 0 |  |  |
|  |               | Agaricostilbomycetes | 3  |   | ND | ND | 3  | 0 |  |  |
|  |               | Agaricostilbomycetes | 3  | 3 | ND | ND | 3  | 0 |  |  |
|  |               | Cystobasidiomycetes  | 9  |   | ND | ND | 9  | 0 |  |  |
|  |               | Erythrobasidiales    | 9  | 3 | ND | ND | 9  | 0 |  |  |
|  |               | Exobasidiomycetes    | 3  |   | ND | ND | 3  | 0 |  |  |
|  |               | Exobasidiales        | 1  | 3 | ND | ND | 1  | 0 |  |  |
|  |               | Georgefischeriales   | 1  | 3 | ND | ND | 1  | 0 |  |  |
|  |               | Microstromatales     | 1  | 3 | ND | ND | 1  | 0 |  |  |
|  |               | Microbotryomycetes   | 16 |   | ND | ND | 16 | 0 |  |  |
|  |               | Leucosporidiales     | 1  | 3 | ND | ND | 1  | 0 |  |  |
|  |               | Sporidiobolales      | 14 | 4 | ND | ND | 14 | 0 |  |  |
|  |               | Microbotryomycetes   | 1  | 3 | ND | ND | 1  | 0 |  |  |
|  |               | Tremellomycetes      | 27 |   | ND | ND | 27 | 0 |  |  |
|  |               | Cystofilobasidiales  | 5  | 3 | ND | ND | 5  | 0 |  |  |
|  |               | Filobasidiales       | 9  | 3 | ND | ND | 9  | 0 |  |  |

|                                   |                    |                   |        |   |       |         |         |    |                                                               |    |                                                                                                   |
|-----------------------------------|--------------------|-------------------|--------|---|-------|---------|---------|----|---------------------------------------------------------------|----|---------------------------------------------------------------------------------------------------|
|                                   |                    | Tremellales       | 13     | 3 | ND    | ND      | 13      | 0  |                                                               |    |                                                                                                   |
|                                   |                    | Ustilaginomycetes | 1      |   | ND    | ND      | 1       | 0  |                                                               |    |                                                                                                   |
|                                   |                    | Ustilaginales     | 1      | 3 | ND    | ND      | 1       | 0  |                                                               |    |                                                                                                   |
|                                   | Blastocladiomycota |                   | ND     | 1 | ND    | ND      | ND      | 0  |                                                               |    |                                                                                                   |
|                                   | Chytridiomycota    |                   | ND     | 1 | ND    | ND      | ND      | 0  |                                                               |    |                                                                                                   |
|                                   | Glomeromycota      |                   | ND     | 1 | ND    | ND      | ND      | 0  |                                                               |    |                                                                                                   |
|                                   | Microsporidia      |                   | ND     | 1 | ND    | ND      | ND      | 0  |                                                               |    |                                                                                                   |
|                                   | Zygomycota         |                   | 8      |   | ND    | ND      | 8       | 0  |                                                               |    |                                                                                                   |
|                                   |                    | “Mucoromycotina”  | 8      |   | ND    | ND      | 8       | 0  |                                                               |    |                                                                                                   |
|                                   |                    | Mortierellales    | 2      | 3 | ND    | ND      | 2       | 0  |                                                               |    |                                                                                                   |
|                                   |                    | Mucorales         | 6      | 3 | ND    | ND      | 6       | 0  |                                                               |    |                                                                                                   |
| Eukarya/Animalia/<br>Opisthokonta |                    |                   | 25,767 |   | 1,489 | 121,318 | 147,085 | 37 |                                                               |    |                                                                                                   |
|                                   | Acanthocephala     |                   | ND     | 1 | ND    | ND      | ND      | ND | ND                                                            | ND |                                                                                                   |
|                                   | Acoelomorpha       |                   | 10     |   | ND    | 50      | 60      | 0  | 1 (Ken-ichi Tajika: Nihon University)                         | 1  | <a href="http://research2.kahaku.go.jp/ujsb/search">http://research2.kahaku.go.jp/ujsb/search</a> |
|                                   |                    | Acoela            | 10     |   | ND    | 50      | 60      | 0  |                                                               |    |                                                                                                   |
|                                   |                    | Acoela            | 10     | 4 | ND    | 50      | 60      | 0  |                                                               |    |                                                                                                   |
|                                   | Annelida           |                   | 1,076  |   | 6     | 124     | 1,200   | 10 |                                                               |    |                                                                                                   |
|                                   |                    | Hirudinea         | 10     | 4 | ND    | ND      | 10      | 0  | 1 (Yoshikazu Takashima)                                       | ND |                                                                                                   |
|                                   |                    | Oligochaeta       | 20     | 4 | ND    | ND      | 20      | 0  | ND                                                            | 1  | 高島義和 (1999) 日本産海産イトミミズ類の分類 (1) 海産貧毛類の研究の現状. 海洋と生物 124: 394-398.                                   |
|                                   |                    | Polychaeta        | 1,046  |   | 6     | 124     | 1,170   | 10 | 6 (Eijiro Nishi: YNU, Tetsuya Kato: Kyoto University, et al.) | 4  | 西榮二郎・加藤哲哉・高島義和 (2003) 環形動物. In: 西田睦・鹿谷法一・諸喜田茂充, 編. 琉球列島の陸水生物. 東京, 東海大学出版会. pp.181-189.            |
|                                   |                    | Amphinomida       | 21     | 4 | ND    | ND      | 21      | 0  |                                                               |    |                                                                                                   |
|                                   |                    | Capitellida       | 48     | 4 | ND    | ND      | 48      | 0  |                                                               |    |                                                                                                   |
|                                   |                    | Cossurida         | 3      | 4 | ND    | ND      | 3       | 0  |                                                               |    |                                                                                                   |
|                                   |                    | Ctenodrilidae     | ND     | 1 | ND    | ND      | ND      | 0  |                                                               |    |                                                                                                   |
|                                   |                    | Diurodrilida      | 1      | 3 | ND    | ND      | 1       | 0  |                                                               |    |                                                                                                   |
|                                   |                    | Eunicida          | 129    | 5 | ND    | 5       | 134     | 0  |                                                               |    |                                                                                                   |
|                                   |                    | Flabelligerida    | 6      | 5 | ND    | 1       | 7       | 0  |                                                               |    |                                                                                                   |
|                                   |                    | Myzostomida       | 30     | 4 | 2     | ND      | 30      | 0  |                                                               |    |                                                                                                   |
|                                   |                    | Opheliida         | 12     | 4 | ND    | ND      | 12      | 0  |                                                               |    |                                                                                                   |
|                                   |                    | Orbiniida         | 23     | 4 | ND    | ND      | 23      | 0  |                                                               |    |                                                                                                   |
|                                   |                    | Oweniida          | 6      | 3 | ND    | ND      | 6       | 0  |                                                               |    |                                                                                                   |
|                                   |                    | Parergodrilida    | ND     | 1 | ND    | ND      | ND      | 0  |                                                               |    |                                                                                                   |
|                                   |                    | Phyllodocida      | 466    | 5 | 1     | ND      | 466     | 4  |                                                               |    |                                                                                                   |

|  |            |               |               |       |   |     |       |       |    |                                                                                |    |                                                                                                                                                                           |
|--|------------|---------------|---------------|-------|---|-----|-------|-------|----|--------------------------------------------------------------------------------|----|---------------------------------------------------------------------------------------------------------------------------------------------------------------------------|
|  |            |               | Poeobiida     | 1     | 3 | ND  | ND    | 1     | 0  |                                                                                |    |                                                                                                                                                                           |
|  |            |               | Polygordiida  | 2     | 3 | 1   | ND    | 2     | 0  |                                                                                |    |                                                                                                                                                                           |
|  |            |               | Protodrilida  | 2     | 3 | ND  | ND    | 2     | 0  |                                                                                |    |                                                                                                                                                                           |
|  |            |               | Psammodrilida | ND    | 1 | ND  | ND    | ND    | 0  |                                                                                |    |                                                                                                                                                                           |
|  |            |               | Qeustida      | ND    | 1 | ND  | ND    | ND    | 0  |                                                                                |    |                                                                                                                                                                           |
|  |            |               | Sabellida     | 130   | 4 | ND  | 40    | 170   | 3  |                                                                                |    |                                                                                                                                                                           |
|  |            |               | Spintherida   | 3     | 3 | ND  | ND    | 3     | 0  |                                                                                |    |                                                                                                                                                                           |
|  |            |               | Spionida      | 89    | 4 | 2   | 42    | 131   | 3  |                                                                                |    |                                                                                                                                                                           |
|  |            |               | Sternaspida   | 1     | 3 | ND  | 1     | 2     | 0  |                                                                                |    |                                                                                                                                                                           |
|  |            |               | Terebellidae  | 73    | 4 | ND  | 35    | 108   | 0  |                                                                                |    |                                                                                                                                                                           |
|  |            |               | Yndolacida    | ND    | 1 | ND  | ND    | ND    | 0  |                                                                                |    |                                                                                                                                                                           |
|  | Arthropoda |               |               | 6,393 |   | 292 | 1,677 | 8,070 | 10 |                                                                                |    |                                                                                                                                                                           |
|  |            | Branchiopoda  |               | 7     |   | ND  | ND    | 7     | 0  | 1 (Takashi Onbé: Hiroshima University)                                         | 2  | Egloff DA, Fofonoff PW, Onbé T (1997) Reproductive biology of marine Cladocerans. Adv Mar Biol. 31: 79-167.                                                               |
|  |            |               | Podonidae     | 6     | 3 | ND  | ND    | 6     | 0  |                                                                                |    |                                                                                                                                                                           |
|  |            |               | Sididae       | 1     | 3 | ND  | ND    | 1     | 0  |                                                                                |    |                                                                                                                                                                           |
|  |            | Cephalocarida |               | 1     |   | ND  | ND    | 1     | 0  | ND                                                                             | ND | <a href="http://research2.kahaku.go.jp/ujssb/search">http://research2.kahaku.go.jp/ujssb/search</a>                                                                       |
|  |            |               | Brachypoda    | 1     | 2 | ND  | ND    | 1     | 0  |                                                                                |    |                                                                                                                                                                           |
|  |            | Insecta       |               | 7     |   | ND  | ND    | 7     | 0  |                                                                                |    |                                                                                                                                                                           |
|  |            |               | Hemiptera     | 4     | 2 | ND  | ND    | 4     | 0  |                                                                                |    |                                                                                                                                                                           |
|  |            |               | Diptera       | 3     | 2 | ND  | ND    | 3     | 0  |                                                                                |    |                                                                                                                                                                           |
|  |            | Malacostraca  |               | 4,074 |   | 195 | 1,539 | 5,613 | 3  |                                                                                |    |                                                                                                                                                                           |
|  |            |               | Amphionidacea | 1     | 2 | ND  | ND    | 1     | 0  | ND                                                                             | ND | <a href="http://research2.kahaku.go.jp/ujssb/search">http://research2.kahaku.go.jp/ujssb/search</a>                                                                       |
|  |            |               | Amphipoda     | 544   | 4 | ND  | 864   | 1,408 | 0  |                                                                                | >2 |                                                                                                                                                                           |
|  |            |               | Bathynellacea | 15    | 4 | ND  | ND    | 15    | 0  |                                                                                |    |                                                                                                                                                                           |
|  |            |               | Cumacea       | 80    | 4 | ND  | ND    | 80    | 0  |                                                                                |    | 菊地知彦 (1997) クーマ類. In: 奥谷喬司・今福道夫・武田正倫 編. 日本動物大百科 7 無脊椎動物, 東京: 平凡社. p. 139.                                                                                                 |
|  |            |               | Decapoda      | 2,501 | 5 | 28  | ND    | 2,501 | 3  | 5 (Komai Tomoyuki: NHMIC, Hironori Komatsu: NMNS, et al.)                      | 8  |                                                                                                                                                                           |
|  |            |               | Euphausiacea  | 86    | 5 | 49  | 5     | 91    | 0  | 3 (Shozo Sawamoto: Tokai University, Nobunari Endo: Tohoku University, et al.) | 5  | Sawamoto S (1979) Geographical distribution of euphausiids in the western part of the subtropical North Pacific Ocean. The Kuroshio IV, Pro 4th CSK Symp. Tokyo. 651-664. |
|  |            |               | Leptostraca   | 4     | 3 | ND  | ND    | 4     | 0  | ND                                                                             | >2 | 菊地知彦 (1997) クーマ類. In: 奥谷喬司・今福道夫・武田正倫 編. 日本動物大百科 7 無脊椎動物, 東京: 平凡社. p. 139.                                                                                                 |
|  |            |               | Lophogastrida | 14    | 4 | 1   | ND    | 14    | 0  | 2 (Kouki Fukuoka: SNF, Masaaki Murano)                                         | 1  | 千原光雄・村野正昭 (1997) 日本産海洋プランクトン検索図説. 東京: 東海大学出版会. 1574 p.                                                                                                                    |

|  |  |             |                 |       |   |     |     |       |   |                                                                                       |    |                                                                                                                                                                                                                                                                                     |
|--|--|-------------|-----------------|-------|---|-----|-----|-------|---|---------------------------------------------------------------------------------------|----|-------------------------------------------------------------------------------------------------------------------------------------------------------------------------------------------------------------------------------------------------------------------------------------|
|  |  |             | Mysida          | 226   | 5 | 117 | ND  | 226   | 0 |                                                                                       | 3  |                                                                                                                                                                                                                                                                                     |
|  |  |             | Stomatopoda     | 56    | 4 | ND  | ND  | 56    | 0 | ND                                                                                    | >2 | <a href="http://research2.kahaku.go.jp/ujssb/search">http://research2.kahaku.go.jp/ujssb/search</a>                                                                                                                                                                                 |
|  |  |             | Tanaidacea      | 92    | 4 | ND  | ND  | 92    | 0 | 3 (Nobuhiro Saito: Suido-sha, Michitaka Shimomura: KMNH, et al.)                      | 4  | Larsen K, Shimomura M (2006) Tanaidacea (Crustacea: Peracarida) from Japan. I. Apseudomorpha from the East China Sea, Seto Inland Sea, and Nansei Islands. Zootaxa 1341: 29-48.                                                                                                     |
|  |  |             | Thermosbaenacea | 1     | 3 | ND  | ND  | 1     | 0 | 1 (Michitaka Shimomura: KMNH)                                                         | ND | Shimomura M, Fujita Y (2009) First record of the thermosbaenacean genus <i>Halosbaena</i> from Asia: <i>H. daitoensis</i> sp. nov. (Peracarida: Thermosbaenacea: Halosbaenidae) from an anchihaline cave of Minamidaito-jima Is., in Okinawa, southern Japan. Zootaxa. 1990: 55-64. |
|  |  |             | Isopoda         | 454   | 5 | ND  | 670 | 1,124 | 0 | 7 (Michitaka Shimomura: KMNH, Noboru Nunomura: TSM, et al.)                           | 3  |                                                                                                                                                                                                                                                                                     |
|  |  | Maxillopoda |                 | 2,150 |   | 37  | 118 | 2,268 | 7 |                                                                                       |    |                                                                                                                                                                                                                                                                                     |
|  |  |             | Arguloida       | 5     | 3 | ND  | ND  | 5     | 0 | 1 (Kazuya Nagasawa: Hiroshima University)                                             | 2  | <a href="http://www.jodc.go.jp/data/biology.html">http://www.jodc.go.jp/data/biology.html</a>                                                                                                                                                                                       |
|  |  |             | Calanoida       | 743   | 5 | 22  | ND  | 743   | 0 | 5 (Susumu Ohtsuka: Hiroshima University, Shuhei Nishida: University of Tokyo, et al.) |    |                                                                                                                                                                                                                                                                                     |
|  |  |             | Cyclopoida      | 78    | 4 | ND  | ND  | 78    | 0 | 4 (Shuhei Nishida: University of Tokyo, Hiroshi Ueda: Kochi University, et al.)       | 3  |                                                                                                                                                                                                                                                                                     |
|  |  |             | Dendrogastrida  | 3     | 3 | 1   | 8   | 11    | 0 | 2 (Mark J. Grygier: LBM, Miéko Komatsu: University of Toyama)                         | 2  | Haramoto S, Komatsu M, Yamazaki Y (2007) Patterns of asexual reproduction in the fissiparous seastar <i>Coscinasterias acutispina</i> (Asteroidea: Echinodermata) in Japan. Zool Sci 24: 1075-1081.                                                                                 |
|  |  |             | Facetotecta     | 10    | 4 | ND  | 40  | 50    | 0 | 2 (Mark J. Grygier: LBM, Tomohiko Kikuchi: YNU)                                       | 1  | Glenner H, Høeg JT, Grygier MJ, Fujita Y (2008) Induced metamorphosis in crustacean y-larvae: Towards a solution to a 100-year-old riddle. BMC Biology 6: 21.                                                                                                                       |
|  |  |             | Halocyprida     | 11    | 4 | ND  | ND  | 11    | 0 | 1 (Akira Tsukagoshi: Shizuoka University)                                             | >2 | <a href="http://research2.kahaku.go.jp/ujssb/search">http://research2.kahaku.go.jp/ujssb/search</a>                                                                                                                                                                                 |
|  |  |             | Harpacticoida   | 140   | 5 | ND  | ND  | 140   | 0 | 3 (Nozomu Iwasaki: Kochi University, Shinji Shimode: University of Tokyo, et al.)     | 3  | <a href="http://www.jodc.go.jp/data/biology.html">http://www.jodc.go.jp/data/biology.html</a>                                                                                                                                                                                       |
|  |  |             | Laurida         | 10    | 4 | 3   | 13  | 23    | 0 | 1 (Mark J. Grygier: LBM)                                                              | 2  | Grygier MJ (1996) A world list of coral reef-associated Ascothoracida (Crustacea), with remarks on Lauridae, Petrarciidae, and Dendrogastridae from Okinawa, Japan. Galaxea 13: 15-33.                                                                                              |
|  |  |             | Lernaeodiscidae | 2     | 3 | ND  | ND  | 2     | 0 | ND                                                                                    | >1 | <a href="http://research2.kahaku.go.jp/ujssb/search">http://research2.kahaku.go.jp/ujssb/search</a>                                                                                                                                                                                 |
|  |  |             | Misophrioida    | 3     | 3 | 1   | ND  | 3     | 0 | 1 (Susumu Ohtsuka: Hiroshima University)                                              | 3  | <a href="http://www.jodc.go.jp/data/biology.html">http://www.jodc.go.jp/data/biology.html</a>                                                                                                                                                                                       |
|  |  |             | Monstrilloida   | 12    | 4 | 5   | ND  | 12    | 0 | 2 (Susumu Ohtsuka: Hiroshima University, Mark J. Grygier: LBM)                        |    |                                                                                                                                                                                                                                                                                     |
|  |  |             | Mormonilloida   | 2     | 3 | 0   | ND  | 2     | 0 | 1 (Susumu Ohtsuka: Hiroshima University)                                              |    |                                                                                                                                                                                                                                                                                     |
|  |  |             | Myodocopida     | 25    | 4 | ND  | ND  | 25    | 0 | 1 (Akira Tsukagoshi: Shizuoka University)                                             | 2  | <a href="http://research2.kahaku.go.jp/ujssb/search">http://research2.kahaku.go.jp/ujssb/search</a>                                                                                                                                                                                 |
|  |  |             | Pedunculata     | 66    | 4 | ND  | 28  | 94    | 0 | 1 (Toshiyuki Yamaguchi: Chiba University)                                             | >2 |                                                                                                                                                                                                                                                                                     |

|  |              |                |                   |       |   |     |     |       |   |                                                                                       |    |                                                                                                     |
|--|--------------|----------------|-------------------|-------|---|-----|-----|-------|---|---------------------------------------------------------------------------------------|----|-----------------------------------------------------------------------------------------------------|
|  |              |                | Peltogastridae    | 4     | 3 | ND  | ND  | 4     | 0 | ND                                                                                    | >1 |                                                                                                     |
|  |              |                | Platycopida       | 2     | 3 | ND  | ND  | 2     | 0 | 1 (Akira Tsukagoshi: Shizuoka University)                                             |    |                                                                                                     |
|  |              |                | Platycopioidea    | 2     | 3 | 2   | ND  | 2     | 0 | 1 (Susumu Ohtsuka: Hiroshima University)                                              | 3  | <a href="http://www.jodc.go.jp/data/biology.html">http://www.jodc.go.jp/data/biology.html</a>       |
|  |              |                | Podocopida        | 284   | 5 | ND  | ND  | 284   | 0 | 1 (Akira Tsukagoshi: Shizuoka University)                                             | >1 | <a href="http://research2.kahaku.go.jp/ujssb/search">http://research2.kahaku.go.jp/ujssb/search</a> |
|  |              |                | Poecilostomatoida | 321   | 5 | ND  | ND  | 321   | 0 | 5 (Kazuya Nagasawa: Hiroshima University, Shuhei Nishida: University of Tokyo et al.) | 3  | <a href="http://www.jodc.go.jp/data/biology.html">http://www.jodc.go.jp/data/biology.html</a>       |
|  |              |                | Sessilia          | 154   | 5 | ND  | 29  | 183   | 6 | 1 (Toshiyuki Yamaguchi: Chiba University)                                             | >2 | <a href="http://research2.kahaku.go.jp/ujssb/search">http://research2.kahaku.go.jp/ujssb/search</a> |
|  |              |                | Siphonostomatoida | 253   | 5 | ND  | ND  | 253   | 1 | 2 (Kazuya Nagasawa: Hiroshima University, Susumu Ohtsuka: Hiroshima University)       | 1  | <a href="http://www.jodc.go.jp/data/biology.html">http://www.jodc.go.jp/data/biology.html</a>       |
|  |              |                | Succulinidae      | 13    | 4 | ND  | ND  | 13    | 0 | ND                                                                                    | >1 | <a href="http://research2.kahaku.go.jp/ujssb/search">http://research2.kahaku.go.jp/ujssb/search</a> |
|  |              |                | Sylonidae         | 1     | 3 | ND  | ND  | 1     | 0 |                                                                                       |    |                                                                                                     |
|  |              |                | Tantulocarida     | 4     | 3 | 3   | ND  | 4     | 0 | 1 (Susumu Ohtsuka: Hiroshima University)                                              | 3  | <a href="http://www.jodc.go.jp/data/biology.html">http://www.jodc.go.jp/data/biology.html</a>       |
|  |              |                | Thompsoniidae     | 2     | 3 | ND  | ND  | 2     | 0 | ND                                                                                    | >1 | <a href="http://research2.kahaku.go.jp/ujssb/search">http://research2.kahaku.go.jp/ujssb/search</a> |
|  |              | Merostoma      |                   | 1     |   | ND  | 0   | 1     | 0 |                                                                                       |    |                                                                                                     |
|  |              |                | Xiphosurida       | 1     | 5 | ND  | 0   | 1     | 0 |                                                                                       |    |                                                                                                     |
|  |              | Pycnogonida    |                   | 153   |   | 60  | 20  | 173   | 0 | 1 (Ko-ichiro Nakamura)                                                                | 3  | Nakamura K, Child CA (1991) Pycnogonida from waters adjacent to Japan. Smithsonian Cont Zool. 512.  |
|  |              |                | Pantopoda         | 153   | 5 | 60  | 20  | 173   | 0 |                                                                                       |    |                                                                                                     |
|  | Brachiopoda  |                |                   | 73    |   | ND  | 27  | 100   | 0 | 2 (Hiroshi Kajihara: Hokkaido University, Shunsuke Mawatari: Hokkaido University)     | >1 | <a href="http://research2.kahaku.go.jp/ujssb/search">http://research2.kahaku.go.jp/ujssb/search</a> |
|  |              | Craniata       |                   | 1     |   | ND  | 2   | 3     | 0 |                                                                                       |    |                                                                                                     |
|  |              |                | Craniida          | 1     | 3 | ND  | 2   | 3     | 0 |                                                                                       |    |                                                                                                     |
|  |              | Lingulata      |                   | 5     |   | ND  | 4   | 9     | 0 |                                                                                       |    |                                                                                                     |
|  |              |                | Lingulida         | 5     | 3 | ND  | 4   | 9     | 0 |                                                                                       |    |                                                                                                     |
|  |              | Rhynchonellata |                   | 67    |   | ND  | 21  | 88    | 0 |                                                                                       |    |                                                                                                     |
|  |              |                | Rhynchonellida    | 13    | 5 | ND  | 2   | 15    | 0 |                                                                                       |    |                                                                                                     |
|  |              |                | Terebratulida     | 53    | 4 | ND  | 16  | 69    | 0 |                                                                                       |    |                                                                                                     |
|  |              |                | Thecideida        | 1     | 3 | ND  | 3   | 4     | 0 |                                                                                       |    |                                                                                                     |
|  | Chaetognatha |                |                   | 36    |   | 5   | 6   | 42    | 0 | 4 (Taichiro Goto: Mie University, Kazuki Kuroda: JSNFR, et al.)                       | 1  |                                                                                                     |
|  |              | Sagittoidea    |                   | 36    |   | 5   | 6   | 42    | 0 |                                                                                       |    |                                                                                                     |
|  |              |                | Aphragmophora     | 25    | 5 | 0   | 0   | 25    | 0 |                                                                                       |    |                                                                                                     |
|  |              |                | Biphragmophora    | 1     | 3 | 1   | 1   | 2     | 0 |                                                                                       |    |                                                                                                     |
|  |              |                | Monophragmophora  | 10    | 4 | 4   | 5   | 15    | 0 |                                                                                       |    |                                                                                                     |
|  | Choanozoa    |                |                   | 54    | 4 | ND  | ND  | 54    | 0 | ND                                                                                    | >1 | <a href="http://research2.kahaku.go.jp/ujssb/search">http://research2.kahaku.go.jp/ujssb/search</a> |
|  | Chordata     |                |                   | 4,330 |   | 364 | 326 | 4,656 | 3 |                                                                                       |    |                                                                                                     |

|  |  |                |                    |       |   |     |     |       |   |                                                                       |     |                                                                                                                                                                                           |
|--|--|----------------|--------------------|-------|---|-----|-----|-------|---|-----------------------------------------------------------------------|-----|-------------------------------------------------------------------------------------------------------------------------------------------------------------------------------------------|
|  |  | Ascidiacea     |                    | 313   |   | ND  | 0   | 313   | 2 | 1 (Teruaki Nishikawa: Toho University)                                | >2  | <a href="http://research2.kahaku.go.jp/ujssb/search">http://research2.kahaku.go.jp/ujssb/search</a>                                                                                       |
|  |  |                | Enterogona         | 173   | 5 | ND  | 0   | 173   | 0 |                                                                       |     |                                                                                                                                                                                           |
|  |  |                | Pleurogona         | 140   | 5 | ND  | 0   | 140   | 2 |                                                                       |     |                                                                                                                                                                                           |
|  |  | Appendicularia |                    | 31    |   | 0   | 6   | 37    | 0 | 2 (Naonobu Shiga: HJC, Riki Sato: AMSL)                               | 3   | 千原光雄・村野正昭 (1997) 日本産海洋プランクトン検索図説. 東京: 東海大学出版会. 1574 p.                                                                                                                                    |
|  |  |                | Fritillariidae     | 15    | 5 | 0   | 2   | 17    | 0 |                                                                       |     |                                                                                                                                                                                           |
|  |  |                | Kowalevskiidae     | 1     | 5 | 0   | 0   | 1     | 0 |                                                                       |     |                                                                                                                                                                                           |
|  |  |                | Oikopleuridae      | 15    | 4 | 0   | 4   | 19    | 0 |                                                                       |     |                                                                                                                                                                                           |
|  |  | Aves           |                    | 84    |   | ND  | 0   | 84    | 0 | >1                                                                    | >50 | <a href="http://www3.town.haboro.hokkaido.jp/seabird/">http://www3.town.haboro.hokkaido.jp/seabird/</a>                                                                                   |
|  |  |                | Charadriiformes    | 49    | 5 | ND  | 0   | 49    | 0 |                                                                       |     |                                                                                                                                                                                           |
|  |  |                | Pelecaniformes     | 12    | 5 | ND  | 0   | 12    | 0 |                                                                       |     |                                                                                                                                                                                           |
|  |  |                | Procellariiformes  | 23    | 5 | ND  | 0   | 23    | 0 |                                                                       |     |                                                                                                                                                                                           |
|  |  | Leptocercia    |                    | 4     |   | ND  | ND  | 4     | 0 | 1 (Teruaki Nishikawa: Toho University)                                | >1  | <a href="http://research2.kahaku.go.jp/ujssb/search">http://research2.kahaku.go.jp/ujssb/search</a>                                                                                       |
|  |  |                | Branchiostomatidae | 4     | 3 | ND  | ND  | 4     | 0 |                                                                       |     |                                                                                                                                                                                           |
|  |  | Mammalia       |                    | 46    |   | 0   | 1   | 47    | 0 |                                                                       |     |                                                                                                                                                                                           |
|  |  |                | Cetartiodactyla    | 39    | 5 | 0   | 1   | 40    | 0 | 3 (Tadasu Yamada: NMNS, Masao Amano: Nagoya University, et al.)       | >5  | <a href="http://www.iwcoffice.org/conservation/cetacea.htm">http://www.iwcoffice.org/conservation/cetacea.htm</a> , <a href="http://www.iucnredlist.org/">http://www.iucnredlist.org/</a> |
|  |  |                | Carnivora          | 7     | 5 | 0   | 0   | 7     | 0 | 3 (Naoki Kohno: NMNS, Kazuo Wada: TAT, et al.)                        |     |                                                                                                                                                                                           |
|  |  | Pisces         |                    | 3,790 |   | 364 | 317 | 4,107 | 1 | 15 (Keiichi Matsuura: NMNS, Tetsuji Nakabo: Kyoto University, et al.) | >50 | <a href="http://research2.kahaku.go.jp/ujssb/search">http://research2.kahaku.go.jp/ujssb/search</a>                                                                                       |
|  |  |                | Acanthuridae       | 39    | 5 | 0   | 0   | 39    | 0 |                                                                       |     |                                                                                                                                                                                           |
|  |  |                | Acipenseridae      | 3     | 5 | 0   | 0   | 3     | 0 |                                                                       |     |                                                                                                                                                                                           |
|  |  |                | Acropomatidae      | 12    | 5 | 2   | 0   | 12    | 0 |                                                                       |     |                                                                                                                                                                                           |
|  |  |                | Agonidae           | 23    | 5 | 4   | 0   | 23    | 0 |                                                                       |     |                                                                                                                                                                                           |
|  |  |                | Albulidae          | 1     | 5 | 0   | 0   | 1     | 0 |                                                                       |     |                                                                                                                                                                                           |
|  |  |                | Alepisauridae      | 2     | 5 | 0   | 0   | 2     | 0 |                                                                       |     |                                                                                                                                                                                           |
|  |  |                | Alepocephalidae    | 20    | 5 | 5   | 0   | 20    | 0 |                                                                       |     |                                                                                                                                                                                           |
|  |  |                | Alopiidae          | 3     | 5 | 0   | 0   | 3     | 0 |                                                                       |     |                                                                                                                                                                                           |
|  |  |                | Ambassidae         | 5     | 5 | 0   | 0   | 5     | 0 |                                                                       |     |                                                                                                                                                                                           |
|  |  |                | Ammodytidae        | 4     | 5 | 1   | 0   | 4     | 0 |                                                                       |     |                                                                                                                                                                                           |
|  |  |                | Anarhichadidae     | 1     | 5 | 1   | 0   | 1     | 0 |                                                                       |     |                                                                                                                                                                                           |
|  |  |                | Anguillidae        | 2     | 5 | 0   | 0   | 2     | 0 |                                                                       |     |                                                                                                                                                                                           |
|  |  |                | Anomalopidae       | 1     | 5 | 0   | 0   | 1     | 0 |                                                                       |     |                                                                                                                                                                                           |
|  |  |                | Anoplogastridae    | 1     | 5 | 0   | 0   | 1     | 0 |                                                                       |     |                                                                                                                                                                                           |
|  |  |                | Anoplopomatidae    | 2     | 5 | 0   | 0   | 2     | 0 |                                                                       |     |                                                                                                                                                                                           |
|  |  |                | Antennariidae      | 14    | 5 | 1   | 0   | 14    | 0 |                                                                       |     |                                                                                                                                                                                           |

|  |  |  |                  |    |   |   |   |    |   |  |  |
|--|--|--|------------------|----|---|---|---|----|---|--|--|
|  |  |  | Aphyonidae       | 1  | 5 | 0 | 0 | 1  | 0 |  |  |
|  |  |  | Aploactinidae    | 6  | 4 | 4 | 3 | 9  | 0 |  |  |
|  |  |  | Apogonidae       | 87 | 5 | 1 | 0 | 87 | 0 |  |  |
|  |  |  | Aracanidae       | 2  | 4 | 0 | 1 | 3  | 0 |  |  |
|  |  |  | Argentinidae     | 3  | 5 | 0 | 0 | 3  | 0 |  |  |
|  |  |  | Ariidae          | 3  | 5 | 0 | 0 | 3  | 0 |  |  |
|  |  |  | Ariommatidae     | 3  | 5 | 0 | 0 | 3  | 0 |  |  |
|  |  |  | Astronesthidae   | 16 | 5 | 0 | 0 | 16 | 0 |  |  |
|  |  |  | Ateleopodidae    | 5  | 5 | 1 | 0 | 5  | 0 |  |  |
|  |  |  | Atherinidae      | 6  | 4 | 0 | 3 | 9  | 0 |  |  |
|  |  |  | Aulopidae        | 4  | 5 | 0 | 0 | 4  | 0 |  |  |
|  |  |  | Aulorhynchidae   | 1  | 5 | 0 | 0 | 1  | 0 |  |  |
|  |  |  | Aulostomidae     | 1  | 5 | 0 | 0 | 1  | 0 |  |  |
|  |  |  | Balistidae       | 21 | 5 | 1 | 1 | 22 | 0 |  |  |
|  |  |  | Banjosidae       | 1  | 5 | 0 | 0 | 1  | 0 |  |  |
|  |  |  | Barbourisiidae   | 1  | 5 | 0 | 0 | 1  | 0 |  |  |
|  |  |  | Bathyclupeidae   | 1  | 5 | 0 | 0 | 1  | 0 |  |  |
|  |  |  | Bathymasteridae  | 3  | 5 | 0 | 0 | 3  | 0 |  |  |
|  |  |  | Bathysauridae    | 1  | 5 | 0 | 0 | 1  | 0 |  |  |
|  |  |  | Bathysauroides   | 1  | 5 | 0 | 0 | 1  | 0 |  |  |
|  |  |  | Belonidae        | 6  | 5 | 0 | 0 | 6  | 0 |  |  |
|  |  |  | Bembridae        | 2  | 5 | 0 | 0 | 2  | 0 |  |  |
|  |  |  | Berycidae        | 4  | 5 | 0 | 0 | 4  | 0 |  |  |
|  |  |  | Blenniidae       | 73 | 5 | 3 | 0 | 73 | 0 |  |  |
|  |  |  | Bothidae         | 36 | 5 | 4 | 0 | 36 | 0 |  |  |
|  |  |  | Bramidae         | 10 | 5 | 0 | 0 | 10 | 0 |  |  |
|  |  |  | Branchiostegidae | 5  | 5 | 0 | 1 | 6  | 0 |  |  |
|  |  |  | Bregmacerotidae  | 6  | 5 | 1 | 0 | 6  | 0 |  |  |
|  |  |  | Bythitidae       | 9  | 5 | 2 | 0 | 9  | 0 |  |  |
|  |  |  | Caesionidae      | 10 | 5 | 0 | 0 | 10 | 0 |  |  |
|  |  |  | Callanthiidae    | 3  | 5 | 0 | 0 | 3  | 0 |  |  |
|  |  |  | Callionymidae    | 37 | 5 | 7 | 0 | 37 | 0 |  |  |
|  |  |  | Caproidae        | 3  | 5 | 0 | 0 | 3  | 0 |  |  |
|  |  |  | Caracanthidae    | 2  | 5 | 0 | 0 | 2  | 0 |  |  |
|  |  |  | Carangidae       | 56 | 5 | 0 | 1 | 57 | 0 |  |  |
|  |  |  | Carapidae        | 12 | 5 | 3 | 0 | 12 | 0 |  |  |
|  |  |  | Carcharhinidae   | 22 | 5 | 0 | 2 | 24 | 0 |  |  |

|  |  |  |                    |    |   |    |   |    |   |  |  |  |
|--|--|--|--------------------|----|---|----|---|----|---|--|--|--|
|  |  |  | Caristiidae        | 1  | 5 | 0  | 0 | 1  | 0 |  |  |  |
|  |  |  | Caulophryinae      | 2  | 5 | 0  | 0 | 2  | 0 |  |  |  |
|  |  |  | Centriscidae       | 2  | 5 | 0  | 0 | 2  | 0 |  |  |  |
|  |  |  | Centrogenysidae    | 1  | 5 | 0  | 0 | 1  | 0 |  |  |  |
|  |  |  | Centrolophidae     | 4  | 5 | 1  | 0 | 4  | 0 |  |  |  |
|  |  |  | Centrophoridae     | 8  | 5 | 3  | 0 | 8  | 0 |  |  |  |
|  |  |  | Cepolidae          | 8  | 5 | 2  | 0 | 8  | 0 |  |  |  |
|  |  |  | Ceratiidae         | 3  | 5 | 0  | 0 | 3  | 0 |  |  |  |
|  |  |  | Cetomimidae        | 7  | 5 | 1  | 0 | 7  | 0 |  |  |  |
|  |  |  | Cetorhinidae       | 1  | 5 | 0  | 0 | 1  | 0 |  |  |  |
|  |  |  | Chaenopsidae       | 6  | 5 | 3  | 0 | 6  | 0 |  |  |  |
|  |  |  | Chaetodontidae     | 51 | 5 | 0  | 0 | 51 | 0 |  |  |  |
|  |  |  | Champsodontidae    | 4  | 5 | 0  | 0 | 4  | 0 |  |  |  |
|  |  |  | Chanidae           | 1  | 5 | 0  | 0 | 1  | 0 |  |  |  |
|  |  |  | Chauliodontidae    | 2  | 5 | 0  | 0 | 2  | 0 |  |  |  |
|  |  |  | Chaunacidae        | 3  | 5 | 0  | 0 | 3  | 0 |  |  |  |
|  |  |  | Cheilodactylidae   | 3  | 5 | 2  | 0 | 3  | 0 |  |  |  |
|  |  |  | Chiasmodontidae    | 6  | 5 | 0  | 0 | 6  | 0 |  |  |  |
|  |  |  | Chimaeridae        | 8  | 5 | 5  | 0 | 8  | 0 |  |  |  |
|  |  |  | Chirocentridae     | 1  | 5 | 0  | 0 | 1  | 0 |  |  |  |
|  |  |  | Chlamydoselachidae | 1  | 5 | 0  | 0 | 1  | 0 |  |  |  |
|  |  |  | Chlopsidae         | 4  | 5 | 0  | 0 | 4  | 0 |  |  |  |
|  |  |  | Chlorophthalmidae  | 7  | 5 | 1  | 0 | 7  | 0 |  |  |  |
|  |  |  | Cirrhitidae        | 14 | 5 | 0  | 0 | 14 | 0 |  |  |  |
|  |  |  | Citharidae         | 3  | 5 | 0  | 0 | 3  | 0 |  |  |  |
|  |  |  | Clinidae           | 2  | 5 | 1  | 0 | 2  | 0 |  |  |  |
|  |  |  | Clupeidae          | 17 | 5 | 0  | 0 | 17 | 0 |  |  |  |
|  |  |  | Colocongridae      | 2  | 5 | 0  | 0 | 2  | 0 |  |  |  |
|  |  |  | Congridae          | 25 | 5 | 5  | 0 | 25 | 0 |  |  |  |
|  |  |  | Congrogadidae      | 1  | 5 | 0  | 0 | 1  | 0 |  |  |  |
|  |  |  | Coryphaenidae      | 2  | 5 | 0  | 0 | 2  | 0 |  |  |  |
|  |  |  | Cottidae           | 80 | 5 | 37 | 6 | 86 | 0 |  |  |  |
|  |  |  | Creediidae         | 4  | 5 | 1  | 0 | 4  | 0 |  |  |  |
|  |  |  | Cryptacanthodidae  | 1  | 5 | 1  | 0 | 1  | 0 |  |  |  |
|  |  |  | Cyclopteridae      | 10 | 5 | 0  | 0 | 10 | 0 |  |  |  |
|  |  |  | Cyematidae         | 1  | 5 | 0  | 0 | 1  | 0 |  |  |  |
|  |  |  | Cynoglossidae      | 18 | 5 | 1  | 0 | 18 | 0 |  |  |  |



|  |  |  |                   |     |   |    |     |     |   |  |  |  |
|--|--|--|-------------------|-----|---|----|-----|-----|---|--|--|--|
|  |  |  | Dactylopteridae   | 3   | 5 | 0  | 0   | 3   | 0 |  |  |  |
|  |  |  | Dalatiidae        | 5   | 5 | 0  | 0   | 5   | 0 |  |  |  |
|  |  |  | Dasyatidae        | 15  | 5 | 2  | 0   | 15  | 0 |  |  |  |
|  |  |  | Derichthyidae     | 2   | 5 | 0  | 0   | 2   | 0 |  |  |  |
|  |  |  | Diceratiidae      | 1   | 5 | 0  | 0   | 1   | 0 |  |  |  |
|  |  |  | Diodontidae       | 7   | 5 | 0  | 0   | 7   | 0 |  |  |  |
|  |  |  | Diretmidae        | 2   | 5 | 0  | 0   | 2   | 0 |  |  |  |
|  |  |  | Draconettidae     | 4   | 5 | 0  | 0   | 4   | 0 |  |  |  |
|  |  |  | Drepanidae        | 2   | 5 | 0  | 0   | 2   | 0 |  |  |  |
|  |  |  | Echeneidae        | 8   | 5 | 0  | 0   | 8   | 0 |  |  |  |
|  |  |  | Echinorhinidae    | 2   | 5 | 0  | 0   | 2   | 0 |  |  |  |
|  |  |  | Eleotridae        | 12  | 5 | 0  | 3   | 15  | 0 |  |  |  |
|  |  |  | Elopidae          | 1   | 5 | 0  | 0   | 1   | 0 |  |  |  |
|  |  |  | Embiotocidae      | 3   | 5 | 1  | 0   | 3   | 0 |  |  |  |
|  |  |  | Emmelichthyidae   | 4   | 5 | 1  | 0   | 4   | 0 |  |  |  |
|  |  |  | Engraulidae       | 9   | 5 | 1  | 0   | 9   | 0 |  |  |  |
|  |  |  | Ehippididae       | 5   | 5 | 0  | 0   | 5   | 0 |  |  |  |
|  |  |  | Epigonidae        | 5   | 5 | 1  | 0   | 5   | 0 |  |  |  |
|  |  |  | Ereuniidae        | 2   | 5 | 2  | 0   | 2   | 0 |  |  |  |
|  |  |  | Etmopteridae      | 12  | 5 | 1  | 0   | 12  | 0 |  |  |  |
|  |  |  | Eurypharyngidae   | 1   | 5 | 0  | 0   | 1   | 0 |  |  |  |
|  |  |  | Evermannellidae   | 4   | 5 | 0  | 0   | 4   | 0 |  |  |  |
|  |  |  | Exocoetidae       | 30  | 5 | 1  | 0   | 30  | 0 |  |  |  |
|  |  |  | Fistulariidae     | 2   | 5 | 0  | 0   | 2   | 0 |  |  |  |
|  |  |  | Gadidae           | 4   | 5 | 0  | 0   | 4   | 0 |  |  |  |
|  |  |  | Gasterosteidae    | 8   | 5 | 2  | 0   | 8   | 0 |  |  |  |
|  |  |  | Gempylidae        | 12  | 5 | 0  | 0   | 12  | 0 |  |  |  |
|  |  |  | Gerreidae         | 10  | 4 | 0  | 3   | 13  | 0 |  |  |  |
|  |  |  | Gigantactinidae   | 5   | 5 | 0  | 0   | 5   | 0 |  |  |  |
|  |  |  | Giganthiidae      | 1   | 5 | 0  | 0   | 1   | 0 |  |  |  |
|  |  |  | Girellidae        | 3   | 5 | 0  | 0   | 3   | 0 |  |  |  |
|  |  |  | Glaucosomatidae   | 1   | 5 | 0  | 0   | 1   | 0 |  |  |  |
|  |  |  | Gobiesocidae      | 11  | 5 | 2  | 0   | 11  | 0 |  |  |  |
|  |  |  | Gobiidae          | 367 | 5 | 28 | 216 | 583 | 0 |  |  |  |
|  |  |  | Gonorynchidae     | 1   | 5 | 0  | 0   | 1   | 0 |  |  |  |
|  |  |  | Gonostomatidae    | 12  | 5 | 0  | 0   | 12  | 0 |  |  |  |
|  |  |  | Grammicolepididae | 2   | 5 | 0  | 0   | 2   | 0 |  |  |  |

|  |  |  |                 |     |   |    |   |     |   |  |  |
|--|--|--|-----------------|-----|---|----|---|-----|---|--|--|
|  |  |  | Gymnuridae      | 2   | 5 | 0  | 0 | 2   | 0 |  |  |
|  |  |  | Haemulidae      | 20  | 5 | 0  | 0 | 20  | 0 |  |  |
|  |  |  | Halosauridae    | 2   | 5 | 0  | 0 | 2   | 0 |  |  |
|  |  |  | Hemiramphidae   | 9   | 5 | 0  | 0 | 9   | 0 |  |  |
|  |  |  | Hemiscyllidae   | 4   | 5 | 0  | 0 | 4   | 0 |  |  |
|  |  |  | Hemitripteridae | 4   | 5 | 0  | 0 | 4   | 0 |  |  |
|  |  |  | Heterodontidae  | 2   | 5 | 1  | 0 | 2   | 0 |  |  |
|  |  |  | Hexagrammidae   | 7   | 5 | 0  | 0 | 7   | 0 |  |  |
|  |  |  | Hexanchidae     | 3   | 5 | 0  | 0 | 3   | 0 |  |  |
|  |  |  | Hexatrygonidae  | 1   | 5 | 0  | 0 | 1   | 0 |  |  |
|  |  |  | Himantolophidae | 2   | 5 | 1  | 0 | 2   | 0 |  |  |
|  |  |  | Holocentridae   | 38  | 5 | 2  | 1 | 39  | 0 |  |  |
|  |  |  | Hoplichthyidae  | 5   | 5 | 1  | 0 | 5   | 0 |  |  |
|  |  |  | Howellidae      | 4   | 5 | 1  | 1 | 5   | 0 |  |  |
|  |  |  | Hypoptychidae   | 1   | 5 | 0  | 0 | 1   | 0 |  |  |
|  |  |  | Icosteidae      | 1   | 5 | 0  | 0 | 1   | 0 |  |  |
|  |  |  | Idiacanthidae   | 2   | 5 | 0  | 0 | 2   | 0 |  |  |
|  |  |  | Ipnopidae       | 2   | 5 | 0  | 0 | 2   | 0 |  |  |
|  |  |  | Istiophoridae   | 5   | 5 | 0  | 0 | 5   | 0 |  |  |
|  |  |  | Kraemeriidae    | 3   | 5 | 0  | 0 | 3   | 0 |  |  |
|  |  |  | Kuhliidae       | 4   | 5 | 0  | 0 | 4   | 0 |  |  |
|  |  |  | Kyphosidae      | 5   | 5 | 0  | 0 | 5   | 0 |  |  |
|  |  |  | Labridae        | 144 | 5 | 0  | 0 | 144 | 0 |  |  |
|  |  |  | Lamnidae        | 4   | 5 | 0  | 0 | 4   | 0 |  |  |
|  |  |  | Lampridae       | 1   | 5 | 0  | 0 | 1   | 0 |  |  |
|  |  |  | Latidae         | 2   | 5 | 1  | 0 | 2   | 0 |  |  |
|  |  |  | Leiognathidae   | 11  | 5 | 0  | 1 | 12  | 0 |  |  |
|  |  |  | Lethrinidae     | 27  | 5 | 0  | 1 | 28  | 0 |  |  |
|  |  |  | Linophrynidae   | 2   | 5 | 0  | 0 | 2   | 0 |  |  |
|  |  |  | Liparidae       | 46  | 5 | 13 | 4 | 50  | 0 |  |  |
|  |  |  | Lipogenyidae    | 1   | 5 | 0  | 0 | 1   | 0 |  |  |
|  |  |  | Lobotidae       | 1   | 5 | 0  | 0 | 1   | 0 |  |  |
|  |  |  | Lophiidae       | 7   | 5 | 0  | 0 | 7   | 0 |  |  |
|  |  |  | Lophotidae      | 2   | 5 | 0  | 0 | 2   | 0 |  |  |
|  |  |  | Loricariidae    | 1   | 5 | 0  | 0 | 1   | 0 |  |  |
|  |  |  | Lutjanidae      | 49  | 5 | 0  | 2 | 51  | 0 |  |  |
|  |  |  | Luvaridae       | 1   | 5 | 0  | 0 | 1   | 0 |  |  |

|  |  |  |                  |    |   |    |   |    |   |  |  |  |
|--|--|--|------------------|----|---|----|---|----|---|--|--|--|
|  |  |  | Macroramphosidae | 1  | 5 | 0  | 0 | 1  | 0 |  |  |  |
|  |  |  | Macrouridae      | 68 | 5 | 25 | 0 | 68 | 0 |  |  |  |
|  |  |  | Macrouroididae   | 1  | 5 | 0  | 0 | 1  | 0 |  |  |  |
|  |  |  | Macrurocyttidae  | 1  | 5 | 0  | 0 | 1  | 0 |  |  |  |
|  |  |  | Malacanthidae    | 5  | 5 | 0  | 0 | 5  | 0 |  |  |  |
|  |  |  | Malacosteidae    | 3  | 5 | 0  | 0 | 3  | 0 |  |  |  |
|  |  |  | Megachasmidae    | 1  | 5 | 0  | 0 | 1  | 0 |  |  |  |
|  |  |  | Megalomycteridae | 1  | 5 | 0  | 0 | 1  | 0 |  |  |  |
|  |  |  | Megalopidae      | 1  | 5 | 0  | 0 | 1  | 0 |  |  |  |
|  |  |  | Melamphidae      | 10 | 5 | 0  | 0 | 10 | 0 |  |  |  |
|  |  |  | Melanocetidae    | 2  | 5 | 0  | 0 | 2  | 0 |  |  |  |
|  |  |  | Melanonidae      | 1  | 5 | 0  | 0 | 1  | 0 |  |  |  |
|  |  |  | Melanostomiidae  | 35 | 5 | 2  | 0 | 35 | 0 |  |  |  |
|  |  |  | Menidae          | 1  | 5 | 0  | 0 | 1  | 0 |  |  |  |
|  |  |  | Merlucciidae     | 1  | 5 | 0  | 0 | 1  | 0 |  |  |  |
|  |  |  | Microcanthidae   | 1  | 5 | 0  | 0 | 1  | 0 |  |  |  |
|  |  |  | Microdesmidae    | 24 | 5 | 0  | 2 | 26 | 0 |  |  |  |
|  |  |  | Microstomatidae  | 8  | 5 | 1  | 0 | 8  | 0 |  |  |  |
|  |  |  | Mirapinnidae     | 1  | 5 | 0  | 0 | 1  | 0 |  |  |  |
|  |  |  | Mitsukurinidae   | 1  | 5 | 0  | 0 | 1  | 0 |  |  |  |
|  |  |  | Molidae          | 3  | 5 | 0  | 0 | 3  | 0 |  |  |  |
|  |  |  | Monacanthidae    | 31 | 5 | 1  | 1 | 32 | 0 |  |  |  |
|  |  |  | Monocentridae    | 1  | 5 | 0  | 0 | 1  | 0 |  |  |  |
|  |  |  | Monodactylidae   | 1  | 5 | 0  | 0 | 1  | 0 |  |  |  |
|  |  |  | Monognathidae    | 1  | 5 | 1  | 0 | 1  | 0 |  |  |  |
|  |  |  | Moridae          | 18 | 5 | 9  | 0 | 18 | 0 |  |  |  |
|  |  |  | Moringuidae      | 4  | 5 | 0  | 0 | 4  | 0 |  |  |  |
|  |  |  | Moronidae        | 3  | 5 | 1  | 0 | 3  | 1 |  |  |  |
|  |  |  | Mugilidae        | 15 | 5 | 0  | 0 | 15 | 0 |  |  |  |
|  |  |  | Mullidae         | 22 | 5 | 0  | 2 | 24 | 0 |  |  |  |
|  |  |  | Muraenesocidae   | 4  | 5 | 0  | 0 | 4  | 0 |  |  |  |
|  |  |  | Muraenidae       | 54 | 5 | 0  | 0 | 54 | 0 |  |  |  |
|  |  |  | Myctophidae      | 88 | 5 | 1  | 0 | 88 | 0 |  |  |  |
|  |  |  | Myliobatidae     | 9  | 5 | 0  | 0 | 9  | 0 |  |  |  |
|  |  |  | Myrocongridae    | 1  | 5 | 0  | 0 | 1  | 0 |  |  |  |
|  |  |  | Myxinidae        | 5  | 5 | 1  | 0 | 5  | 0 |  |  |  |
|  |  |  | Nemichthyidae    | 3  | 5 | 0  | 0 | 3  | 0 |  |  |  |

|  |  |  |                  |    |   |    |   |    |   |  |  |
|--|--|--|------------------|----|---|----|---|----|---|--|--|
|  |  |  | Nemipteridae     | 21 | 5 | 0  | 0 | 21 | 0 |  |  |
|  |  |  | Neoscopelidae    | 4  | 5 | 0  | 0 | 4  | 0 |  |  |
|  |  |  | Nettastomatidae  | 5  | 5 | 0  | 0 | 5  | 0 |  |  |
|  |  |  | Nomeidae         | 8  | 5 | 0  | 0 | 8  | 0 |  |  |
|  |  |  | Notacanthidae    | 3  | 5 | 0  | 0 | 3  | 0 |  |  |
|  |  |  | Notocheiridae    | 1  | 5 | 1  | 0 | 1  | 0 |  |  |
|  |  |  | Notorynchidae    | 1  | 5 | 0  | 0 | 1  | 0 |  |  |
|  |  |  | Notosudidae      | 5  | 5 | 0  | 0 | 5  | 0 |  |  |
|  |  |  | Odontaspidae     | 2  | 5 | 0  | 0 | 2  | 0 |  |  |
|  |  |  | Odontobutidae    | 1  | 3 | 2  | 1 | 2  | 0 |  |  |
|  |  |  | Ogcocephalidae   | 19 | 5 | 1  | 1 | 20 | 0 |  |  |
|  |  |  | Oneirodidae      | 6  | 5 | 0  | 0 | 6  | 0 |  |  |
|  |  |  | Ophichthidae     | 40 | 5 | 13 | 0 | 40 | 0 |  |  |
|  |  |  | Ophidiidae       | 30 | 5 | 10 | 0 | 30 | 0 |  |  |
|  |  |  | Opisthoproctidae | 5  | 5 | 0  | 0 | 5  | 0 |  |  |
|  |  |  | Opistognathiae   | 9  | 5 | 5  | 0 | 9  | 0 |  |  |
|  |  |  | Oplegnathidae    | 2  | 5 | 0  | 0 | 2  | 0 |  |  |
|  |  |  | Orectolobidae    | 3  | 5 | 0  | 0 | 3  | 0 |  |  |
|  |  |  | Oreosomatidae    | 1  | 5 | 0  | 0 | 1  | 0 |  |  |
|  |  |  | Osmeridae        | 7  | 5 | 0  | 0 | 7  | 0 |  |  |
|  |  |  | Ostraciidae      | 9  | 5 | 0  | 0 | 9  | 0 |  |  |
|  |  |  | Ostracoberycidae | 2  | 5 | 1  | 0 | 2  | 0 |  |  |
|  |  |  | Oxynotidae       | 1  | 5 | 1  | 0 | 1  | 0 |  |  |
|  |  |  | Parabembridae    | 1  | 5 | 0  | 0 | 1  | 0 |  |  |
|  |  |  | Parabrotulidae   | 2  | 5 | 1  | 0 | 2  | 0 |  |  |
|  |  |  | Paralepididae    | 21 | 5 | 1  | 0 | 21 | 0 |  |  |
|  |  |  | Paralichthyidae  | 10 | 5 | 1  | 0 | 10 | 0 |  |  |
|  |  |  | Parascylliidae   | 2  | 5 | 1  | 0 | 2  | 0 |  |  |
|  |  |  | Paraulopidae     | 4  | 5 | 2  | 0 | 4  | 0 |  |  |
|  |  |  | Parazenidae      | 1  | 5 | 0  | 0 | 1  | 0 |  |  |
|  |  |  | Pegasidae        | 3  | 5 | 0  | 0 | 3  | 0 |  |  |
|  |  |  | Pempheridae      | 5  | 5 | 0  | 0 | 5  | 0 |  |  |
|  |  |  | Pentacerotidae   | 4  | 5 | 0  | 0 | 4  | 0 |  |  |
|  |  |  | Percophidae      | 13 | 5 | 0  | 0 | 13 | 0 |  |  |
|  |  |  | Peristediidae    | 15 | 5 | 4  | 0 | 15 | 0 |  |  |
|  |  |  | Petromyzontidae  | 4  | 5 | 0  | 0 | 4  | 0 |  |  |
|  |  |  | Pholidae         | 6  | 5 | 1  | 0 | 6  | 0 |  |  |

|  |  |  |                     |    |   |   |   |    |   |  |  |  |
|--|--|--|---------------------|----|---|---|---|----|---|--|--|--|
|  |  |  | Phosichthyidae      | 9  | 5 | 0 | 0 | 9  | 0 |  |  |  |
|  |  |  | Pinguipedidae       | 24 | 5 | 0 | 0 | 24 | 0 |  |  |  |
|  |  |  | Platycephalidae     | 17 | 5 | 0 | 0 | 17 | 0 |  |  |  |
|  |  |  | Platyrrhinidae      | 1  | 5 | 0 | 0 | 1  | 0 |  |  |  |
|  |  |  | Platyroctidae       | 3  | 5 | 0 | 0 | 3  | 0 |  |  |  |
|  |  |  | Plecoglossidae      | 2  | 5 | 1 | 0 | 2  | 0 |  |  |  |
|  |  |  | Plesiobatididae     | 1  | 5 | 0 | 0 | 1  | 0 |  |  |  |
|  |  |  | Plesiopidae         | 9  | 5 | 0 | 0 | 9  | 0 |  |  |  |
|  |  |  | Pleuronectidae      | 33 | 5 | 0 | 0 | 33 | 0 |  |  |  |
|  |  |  | Plotosidae          | 1  | 5 | 0 | 0 | 1  | 0 |  |  |  |
|  |  |  | Poeciliidae         | 2  | 5 | 0 | 0 | 2  | 0 |  |  |  |
|  |  |  | Poecilopsettidae    | 1  | 5 | 0 | 0 | 1  | 0 |  |  |  |
|  |  |  | Polymixiidae        | 4  | 5 | 1 | 0 | 4  | 0 |  |  |  |
|  |  |  | Polynemidae         | 4  | 5 | 0 | 0 | 4  | 0 |  |  |  |
|  |  |  | Polyprionidae       | 2  | 5 | 1 | 0 | 2  | 0 |  |  |  |
|  |  |  | Pomacanthidae       | 30 | 5 | 1 | 0 | 30 | 0 |  |  |  |
|  |  |  | Pomacentridae       | 99 | 5 | 2 | 0 | 99 | 0 |  |  |  |
|  |  |  | Priacanthidae       | 10 | 5 | 0 | 1 | 11 | 0 |  |  |  |
|  |  |  | Pristidae           | 1  | 5 | 0 | 0 | 1  | 0 |  |  |  |
|  |  |  | Pristiophoridae     | 1  | 5 | 0 | 0 | 1  | 0 |  |  |  |
|  |  |  | Proscylliidae       | 2  | 5 | 1 | 0 | 2  | 0 |  |  |  |
|  |  |  | Pseudocarcharinidae | 1  | 5 | 0 | 0 | 1  | 0 |  |  |  |
|  |  |  | Pseudochromidae     | 7  | 5 | 0 | 0 | 7  | 0 |  |  |  |
|  |  |  | Pseudoplesiopidae   | 1  | 5 | 0 | 0 | 1  | 0 |  |  |  |
|  |  |  | Pseudotriakidae     | 1  | 5 | 0 | 0 | 1  | 0 |  |  |  |
|  |  |  | Pseudotrichonotidae | 1  | 5 | 1 | 0 | 1  | 0 |  |  |  |
|  |  |  | Psychrolutidae      | 11 | 5 | 3 | 1 | 12 | 0 |  |  |  |
|  |  |  | Pterothrissidae     | 1  | 5 | 1 | 0 | 1  | 0 |  |  |  |
|  |  |  | Ptilichthyidae      | 1  | 5 | 0 | 0 | 1  | 0 |  |  |  |
|  |  |  | Rachycentridae      | 1  | 5 | 0 | 0 | 1  | 0 |  |  |  |
|  |  |  | Rajidae             | 33 | 5 | 9 | 0 | 33 | 0 |  |  |  |
|  |  |  | Regalecidae         | 1  | 5 | 0 | 0 | 1  | 0 |  |  |  |
|  |  |  | Rhamphocottidae     | 1  | 5 | 0 | 0 | 1  | 0 |  |  |  |
|  |  |  | Rhincodontidae      | 3  | 5 | 0 | 0 | 3  | 0 |  |  |  |
|  |  |  | Rhinobatidae        | 3  | 5 | 0 | 0 | 3  | 0 |  |  |  |
|  |  |  | Rhinochimaeridae    | 3  | 5 | 0 | 0 | 3  | 0 |  |  |  |
|  |  |  | Rhyacichthyidae     | 1  | 5 | 0 | 0 | 1  | 0 |  |  |  |

|  |  |  |                    |     |   |    |    |     |   |  |  |
|--|--|--|--------------------|-----|---|----|----|-----|---|--|--|
|  |  |  | Rhynchobatidae     | 2   | 5 | 0  | 0  | 2   | 0 |  |  |
|  |  |  | Rondeletiidae      | 1   | 5 | 0  | 0  | 1   | 0 |  |  |
|  |  |  | Salangidae         | 4   | 5 | 2  | 0  | 4   | 0 |  |  |
|  |  |  | Salmonidae         | 20  | 5 | 6  | 0  | 20  | 0 |  |  |
|  |  |  | Samaridae          | 5   | 5 | 1  | 0  | 5   | 0 |  |  |
|  |  |  | Scaridae           | 34  | 5 | 0  | 0  | 34  | 0 |  |  |
|  |  |  | Scatophagidae      | 1   | 5 | 0  | 0  | 1   | 0 |  |  |
|  |  |  | Schindleriidae     | 1   | 3 | 0  | 8  | 9   | 0 |  |  |
|  |  |  | Sciaenidae         | 17  | 5 | 0  | 0  | 17  | 0 |  |  |
|  |  |  | Scomberesocidae    | 1   | 5 | 0  | 0  | 1   | 0 |  |  |
|  |  |  | Scombridae         | 21  | 5 | 0  | 0  | 21  | 0 |  |  |
|  |  |  | Scombrolabracidae  | 1   | 5 | 0  | 0  | 1   | 0 |  |  |
|  |  |  | Scombropidae       | 2   | 5 | 1  | 0  | 2   | 0 |  |  |
|  |  |  | Scopelarchidae     | 11  | 5 | 0  | 0  | 11  | 0 |  |  |
|  |  |  | Scorpaenidae       | 99  | 5 | 15 | 12 | 111 | 0 |  |  |
|  |  |  | Scorpididae        | 1   | 5 | 0  | 0  | 1   | 0 |  |  |
|  |  |  | Scyliorhinidae     | 16  | 5 | 5  | 0  | 16  | 0 |  |  |
|  |  |  | Serranidae         | 129 | 5 | 8  | 0  | 129 | 0 |  |  |
|  |  |  | Serrivomeridae     | 2   | 5 | 0  | 0  | 2   | 0 |  |  |
|  |  |  | Siganidae          | 12  | 5 | 0  | 0  | 12  | 0 |  |  |
|  |  |  | Sillaginidae       | 4   | 5 | 0  | 0  | 4   | 0 |  |  |
|  |  |  | Sinipercidae       | 1   | 5 | 0  | 0  | 1   | 0 |  |  |
|  |  |  | Soleidae           | 17  | 5 | 2  | 0  | 17  | 0 |  |  |
|  |  |  | Solenostomidae     | 3   | 5 | 0  | 0  | 3   | 0 |  |  |
|  |  |  | Somniosidae        | 6   | 5 | 1  | 0  | 6   | 0 |  |  |
|  |  |  | Sparidae           | 13  | 5 | 0  | 1  | 14  | 0 |  |  |
|  |  |  | Sphyaenidae        | 9   | 5 | 0  | 0  | 9   | 0 |  |  |
|  |  |  | Sphyrnidae         | 3   | 5 | 0  | 0  | 3   | 0 |  |  |
|  |  |  | Squalidae          | 8   | 5 | 2  | 0  | 8   | 0 |  |  |
|  |  |  | Squatinae          | 2   | 5 | 0  | 0  | 2   | 0 |  |  |
|  |  |  | Sternoptychidae    | 17  | 5 | 2  | 0  | 17  | 0 |  |  |
|  |  |  | Stichaeidae        | 34  | 5 | 6  | 1  | 35  | 0 |  |  |
|  |  |  | Stomiidae          | 3   | 5 | 0  | 0  | 3   | 0 |  |  |
|  |  |  | Stromateidae       | 4   | 5 | 0  | 0  | 4   | 0 |  |  |
|  |  |  | Symphysanodontidae | 2   | 5 | 0  | 0  | 2   | 0 |  |  |
|  |  |  | Synanceiidae       | 9   | 5 | 0  | 0  | 9   | 0 |  |  |
|  |  |  | Synphobranchidae   | 10  | 5 | 0  | 0  | 10  | 0 |  |  |

|  |  |           |                 |    |   |    |    |    |   |                                        |    |                                                                                                                                           |
|--|--|-----------|-----------------|----|---|----|----|----|---|----------------------------------------|----|-------------------------------------------------------------------------------------------------------------------------------------------|
|  |  |           | Synbranchidae   | 1  | 5 | 0  | 0  | 1  | 0 |                                        |    |                                                                                                                                           |
|  |  |           | Syngnathidae    | 51 | 5 | 2  | 0  | 51 | 0 |                                        |    |                                                                                                                                           |
|  |  |           | Synodontidae    | 23 | 5 | 0  | 0  | 23 | 0 |                                        |    |                                                                                                                                           |
|  |  |           | Teraponidae     | 7  | 5 | 1  | 0  | 7  | 0 |                                        |    |                                                                                                                                           |
|  |  |           | Tetragonuridae  | 2  | 5 | 0  | 0  | 2  | 0 |                                        |    |                                                                                                                                           |
|  |  |           | Tetraodontidae  | 51 | 5 | 2  | 4  | 55 | 0 |                                        |    |                                                                                                                                           |
|  |  |           | Tetrarogidae    | 8  | 5 | 3  | 0  | 8  | 0 |                                        |    |                                                                                                                                           |
|  |  |           | Torpedinidae    | 6  | 5 | 1  | 0  | 6  | 0 |                                        |    |                                                                                                                                           |
|  |  |           | Toxotidae       | 1  | 5 | 0  | 0  | 1  | 0 |                                        |    |                                                                                                                                           |
|  |  |           | Trachichthyidae | 6  | 5 | 3  | 0  | 6  | 0 |                                        |    |                                                                                                                                           |
|  |  |           | Trachipteridae  | 5  | 5 | 0  | 0  | 5  | 0 |                                        |    |                                                                                                                                           |
|  |  |           | Triacanthidae   | 1  | 5 | 0  | 0  | 1  | 0 |                                        |    |                                                                                                                                           |
|  |  |           | Triacanthodidae | 7  | 5 | 0  | 0  | 7  | 0 |                                        |    |                                                                                                                                           |
|  |  |           | Triakidae       | 5  | 5 | 0  | 0  | 5  | 0 |                                        |    |                                                                                                                                           |
|  |  |           | Trichiuridae    | 12 | 5 | 1  | 0  | 12 | 0 |                                        |    |                                                                                                                                           |
|  |  |           | Trichodontidae  | 1  | 5 | 0  | 0  | 1  | 0 |                                        |    |                                                                                                                                           |
|  |  |           | Trichonotidae   | 3  | 5 | 0  | 0  | 3  | 0 |                                        |    |                                                                                                                                           |
|  |  |           | Triglidae       | 19 | 5 | 2  | 0  | 19 | 0 |                                        |    |                                                                                                                                           |
|  |  |           | Triodontidae    | 1  | 5 | 0  | 0  | 1  | 0 |                                        |    |                                                                                                                                           |
|  |  |           | Tripterygiidae  | 22 | 5 | 2  | 2  | 24 | 0 |                                        |    |                                                                                                                                           |
|  |  |           | Uranoscopidae   | 7  | 5 | 0  | 0  | 7  | 0 |                                        |    |                                                                                                                                           |
|  |  |           | Urolophidae     | 1  | 5 | 0  | 0  | 1  | 0 |                                        |    |                                                                                                                                           |
|  |  |           | Veliferidae     | 2  | 5 | 0  | 0  | 2  | 0 |                                        |    |                                                                                                                                           |
|  |  |           | Xenisthmidae    | 4  | 3 | 0  | 6  | 10 | 0 |                                        |    |                                                                                                                                           |
|  |  |           | Xiphiidae       | 1  | 5 | 0  | 0  | 1  | 0 |                                        |    |                                                                                                                                           |
|  |  |           | Zanclidae       | 1  | 5 | 0  | 0  | 1  | 0 |                                        |    |                                                                                                                                           |
|  |  |           | Zaproridae      | 1  | 5 | 0  | 0  | 1  | 0 |                                        |    |                                                                                                                                           |
|  |  |           | Zeidae          | 4  | 3 | 0  | 5  | 9  | 0 |                                        |    |                                                                                                                                           |
|  |  |           | Zoarcidae       | 67 | 4 | 21 | 19 | 86 | 0 |                                        |    |                                                                                                                                           |
|  |  | Reptilia  |                 | 22 |   | ND | 0  | 22 | 0 |                                        |    |                                                                                                                                           |
|  |  |           | Cheloniidae     | 5  | 5 | ND | 0  | 5  | 0 | >1                                     | >3 | <a href="http://research2.kahaku.go.jp/ujssb/search">http://research2.kahaku.go.jp/ujssb/search</a>                                       |
|  |  |           | Dermochelyidae  | 1  | 5 | ND | 0  | 1  | 0 |                                        |    |                                                                                                                                           |
|  |  |           | Squamata        | 16 | 5 | ND | 0  | 16 | 0 |                                        |    | <a href="http://mail2.nara-edu.ac.jp/~inoue/NNM/hatyuurui/wamei-h.html">http://mail2.nara-edu.ac.jp/~inoue/NNM/hatyuurui/wamei-h.html</a> |
|  |  | Thaliacea |                 | 40 |   | 0  | 2  | 42 | 0 | 1 (Jun Nishikawa: University of Tokyo) | 1  | 西川淳 (1997) 脊索動物門, 尾索動物亜門, 被囊動物亜門, タリア綱. In: 千原光雄・村野正昭, 編. 日本産海洋プランクトン検索図説. 東京, 東海大学出版会. pp. 1351-1392, 1525-1528.                         |

|  |          |                  |       |   |     |     |       |   |                                                                      |     |                                                                                                                                                                                    |
|--|----------|------------------|-------|---|-----|-----|-------|---|----------------------------------------------------------------------|-----|------------------------------------------------------------------------------------------------------------------------------------------------------------------------------------|
|  |          | Doliolida        | 4     | 5 | 0   | 1   | 5     | 0 |                                                                      |     |                                                                                                                                                                                    |
|  |          | Pyrosomatida     | 8     | 5 | 0   | 0   | 8     | 0 |                                                                      |     |                                                                                                                                                                                    |
|  |          | Salpida          | 28    | 5 | 0   | 1   | 29    | 0 |                                                                      |     |                                                                                                                                                                                    |
|  | Cnidaria |                  | 1,876 |   | 350 | 364 | 2,240 | 1 |                                                                      |     |                                                                                                                                                                                    |
|  |          | Anthozoa         | 1,296 |   | 238 | 355 | 1,651 | 0 |                                                                      |     |                                                                                                                                                                                    |
|  |          | Actiniaria       | 174   | 5 | 26  | 30  | 204   | 0 | 2 (Kensuke Yanagi: NHMIC, Hiroomi Uchida: KMPC)                      | 4   | Yanagi K (2006) Sea anemones around the Sagami Sea with the list of Japanese species. Mem Nat Sci Mus Tokyo 40: 113-173.                                                           |
|  |          | Alcyonacea       | 223   | 5 | 50  | 120 | 343   | 0 | 4 (Yukimitsu Imahara: BIK, Fumihito Iwase BIK, et al.)               | 7   | Imahara Y (2006) Preliminary report on the Alcyonacean and Pennatulacean octocorals collected by the Natural History Research of the Sagami Sea. Mem Nat Sci Mus Tokyo 40: 91-101. |
|  |          | Antipatharia     | ND    | 1 | ND  | ND  | ND    | 0 |                                                                      |     |                                                                                                                                                                                    |
|  |          | Ceriantharia     | 4     | 3 | ND  | ND  | 4     | 0 | 1 (Hiroomi Uchida: KMPC)                                             | >5  | <a href="http://research2.kahaku.go.jp/ujssb/search">http://research2.kahaku.go.jp/ujssb/search</a>                                                                                |
|  |          | Corallimorpharia | 11    | 4 | ND  | ND  | 11    | 0 |                                                                      |     |                                                                                                                                                                                    |
|  |          | Gorgonacea       | 241   | 5 | 115 | 70  | 311   | 0 | 4 (Yukimitsu Imahara: BIK, Fumihito Iwase BIK, et al.)               | 8   | Imahara Y (1996) Previously recorded octocorals from Japan and adjacent seas. Precious Corals Octocoral Res 17-44.                                                                 |
|  |          | Helioporacea     | 1     | 3 | 0   | ND  | 1     | 0 |                                                                      | 3   |                                                                                                                                                                                    |
|  |          | Pennatulacea     | 71    | 4 | 24  | 20  | 91    | 0 |                                                                      | 5   | Imahara Y (2006) Preliminary report on the Alcyonacean and Pennatulacean octocorals collected by the Natural History Research of the Sagami Sea. Mem Nat Sci Mus Tokyo 40: 91-101. |
|  |          | Scleractinia     | 530   | 5 | 10  | 100 | 630   | 0 | 10 (Hironobu Fukami: Kyoto University, Keiichi Nomura: KMPC, et al.) | >10 | 西平守孝・Veron JEN (1995) 日本の造礁サンゴ類. 東京: 海游舎. 440 p.                                                                                                                                   |
|  |          | Stolonifera      | 18    | 4 | 8   | 10  | 28    | 0 | 1 (Yukimitsu Imahara: BIK)                                           | 3   | Imahara Y (2006) Preliminary report on the Alcyonacean and Pennatulacean octocorals collected by the Natural History Research of the Sagami Sea. Mem Nat Sci Mus Tokyo 40: 91-101. |
|  |          | Telestacea       | 8     | 3 | 5   | 5   | 13    | 0 |                                                                      | 4   | Imahara Y (1996) Previously recorded octocorals from Japan and adjacent seas. Precious Corals Octocoral Res 17-44.                                                                 |
|  |          | Zoantharia       | 15    | 4 | ND  | ND  | 15    | 0 | 1 (James Davis Reimer: University of the Ryukyus)                    | >5  | <a href="http://research2.kahaku.go.jp/ujssb/search">http://research2.kahaku.go.jp/ujssb/search</a>                                                                                |
|  |          | Cubozoa          | 4     |   | 3   | ND  | 4     | 0 | 2 (Shin Kubota: Kyoto University, Hiroshi Namikawa: NMNS)            | >5  |                                                                                                                                                                                    |
|  |          | Cubomedusae      | 4     | 4 | 3   | ND  | 4     | 0 |                                                                      |     |                                                                                                                                                                                    |
|  |          | Hydrozoa         | 539   |   | 105 | 9   | 539   | 0 |                                                                      |     |                                                                                                                                                                                    |
|  |          | Actinulida       | 1     | 3 | ND  | ND  | 1     | 0 |                                                                      |     |                                                                                                                                                                                    |
|  |          | Athecata         | 130   | 5 | 53  | ND  | 130   | 0 |                                                                      |     |                                                                                                                                                                                    |
|  |          | Laingiomedusa    | 1     | 3 | 0   | ND  | 1     | 0 |                                                                      |     |                                                                                                                                                                                    |
|  |          | Limnomedusae     | 8     | 3 | 2   | ND  | 8     | 0 |                                                                      |     |                                                                                                                                                                                    |
|  |          | Milleporina      | 10    | 4 | ND  | ND  | 10    | 0 |                                                                      |     |                                                                                                                                                                                    |
|  |          | Narcomedusae     | 9     | 3 | 0   | ND  | 9     | 0 |                                                                      |     |                                                                                                                                                                                    |



|  |               |                  |       |   |    |    |       |    |                                                        |    |                                                                                                                                                         |
|--|---------------|------------------|-------|---|----|----|-------|----|--------------------------------------------------------|----|---------------------------------------------------------------------------------------------------------------------------------------------------------|
|  |               | Siphonophora     | 54    | 4 | 4  | 9  | 54    | 0  |                                                        |    |                                                                                                                                                         |
|  |               | Stylasterina     | 24    | 4 | ND | ND | 24    | 0  |                                                        |    |                                                                                                                                                         |
|  |               | Thecata          | 286   | 5 | 46 | ND | 286   | 0  |                                                        |    |                                                                                                                                                         |
|  |               | Trachymedusae    | 16    | 4 | 0  | ND | 16    | 0  |                                                        |    |                                                                                                                                                         |
|  |               | Scyphozoa        | 37    |   | 4  | ND | 37    | 1  |                                                        |    |                                                                                                                                                         |
|  |               | Coronatae        | 7     | 3 | 2  | ND | 7     | 0  |                                                        |    |                                                                                                                                                         |
|  |               | Rhizostomeae     | 10    | 4 | 2  | ND | 10    | 1  |                                                        |    |                                                                                                                                                         |
|  |               | Semaeostomeae    | 12    | 4 | 0  | ND | 12    | 0  |                                                        |    |                                                                                                                                                         |
|  |               | Stauromedusae    | 8     | 3 | 0  | ND | 8     | 0  |                                                        |    |                                                                                                                                                         |
|  | Ctenophora    |                  | 41    |   | 15 | 13 | 54    | 0  | 4 (Takushi Horita, Dhugal J. Lindsay: JAMSTEC, et al.) | 3  | <a href="http://www.catalogueoflife.org/annual-checklist/search.php">http://www.catalogueoflife.org/annual-checklist/search.php</a>                     |
|  |               | Nuda             | 6     |   | 2  | 0  | 6     | 0  |                                                        |    |                                                                                                                                                         |
|  |               | Beroidea         | 6     | 5 | 2  | 0  | 6     | 0  |                                                        |    |                                                                                                                                                         |
|  |               | Tentaculata      | 35    |   | 13 | 13 | 48    | 0  |                                                        |    |                                                                                                                                                         |
|  |               | Cestida          | 1     | 5 | 0  | 0  | 1     | 0  |                                                        |    |                                                                                                                                                         |
|  |               | Cydlippida       | 12    | 4 | 0  | 6  | 18    | 0  |                                                        |    |                                                                                                                                                         |
|  |               | Ganeshida        | 0     | 1 | 0  | 1  | 1     | 0  |                                                        |    |                                                                                                                                                         |
|  |               | Lobata           | 13    | 5 | 6  | 3  | 16    | 0  |                                                        |    |                                                                                                                                                         |
|  |               | Platyctenida     | 8     | 5 | 7  | 1  | 9     | 0  |                                                        |    |                                                                                                                                                         |
|  |               | Thalassocalycida | 1     | 5 | 0  | 0  | 1     | 0  |                                                        |    |                                                                                                                                                         |
|  |               | incertae sedis   | ND    | 1 | ND | 2  | ND    | 0  |                                                        |    |                                                                                                                                                         |
|  | Cycliophora   |                  | ND    | 1 | ND | ND | ND    | ND | -                                                      |    |                                                                                                                                                         |
|  | Dicyemida     |                  | 120   | 5 | 40 | 30 | 150   | 0  | 1 (Hidetaka Furuya: Osaka University)                  | >1 |                                                                                                                                                         |
|  | Echinodermata |                  | 1,052 |   | ND | ND | 1,052 | 0  |                                                        |    |                                                                                                                                                         |
|  |               | Asteroidea       | 280   |   | ND | ND | 280   | 0  | 2 (Toshihiko Fujita: NMNS, Masaki Saba)                | 1  | 林良二 (1973) 相模湾産海星類. 東京: 保育社. 239 p.                                                                                                                     |
|  |               | Brisingida       | 15    | 4 | ND | ND | 15    | 0  |                                                        |    | <a href="http://research2.kahaku.go.jp/ujssb/search">http://research2.kahaku.go.jp/ujssb/search</a>                                                     |
|  |               | Forcipulitida    | 47    | 4 | ND | ND | 47    | 0  |                                                        |    |                                                                                                                                                         |
|  |               | Notomyotida      | 10    | 4 | ND | ND | 10    | 0  |                                                        |    |                                                                                                                                                         |
|  |               | Spinulosida      | 30    | 4 | ND | ND | 30    | 0  |                                                        |    |                                                                                                                                                         |
|  |               | Paxillosida      | 51    | 4 | ND | ND | 51    | 0  |                                                        |    | Saba M, Fujita T (2006) Asteroidea (Echinodermata) from the Sagami Sea, central Japan. 1. Paxillosida and Valvatida. Mem Nat Sci Mus Tokyo 41: 251-287. |
|  |               | Valvatida        | 105   | 5 | ND | ND | 105   | 0  |                                                        |    |                                                                                                                                                         |
|  |               | Velatida         | 22    | 4 | ND | ND | 22    | 0  |                                                        |    | <a href="http://research2.kahaku.go.jp/ujssb/search">http://research2.kahaku.go.jp/ujssb/search</a>                                                     |
|  |               | Crinoidea        | 111   |   | ND | ND | 111   | 0  | 2 (Toshihiko Fujita: NMNS, Ichizo Kogo: OMNH)          | 2  |                                                                                                                                                         |
|  |               | Bourguetierinida | 2     | 3 | ND | ND | 2     | 0  |                                                        |    | <a href="http://research2.kahaku.go.jp/ujssb/search">http://research2.kahaku.go.jp/ujssb/search</a>                                                     |
|  |               | Comatulida       | 96    | 4 | ND | ND | 96    | 0  |                                                        |    | Kogo I (2006) Comatulid Fauna                                                                                                                           |

|  |                    |               |                  |     |   |    |     |       |   |                                                                                   |    |                                                                                                                                           |
|--|--------------------|---------------|------------------|-----|---|----|-----|-------|---|-----------------------------------------------------------------------------------|----|-------------------------------------------------------------------------------------------------------------------------------------------|
|  |                    |               |                  |     |   |    |     |       |   |                                                                                   |    | (Echinodermata: Crinoidea: Comatulida) of the Sagami Sea and a Part of Izu Islands, central Japan. Mem Nat Sci Mus Tokyo 41: 223-287.     |
|  |                    |               | Hyocrinida       | 3   | 3 | ND | ND  | 3     | 0 |                                                                                   |    | Kogo I (1998) Crinoids from Japan and its adjacent waters. Special publication. Osaka Mus Nat Hist 30: 1-148.                             |
|  |                    |               | Isocrinida       | 10  | 4 | ND | ND  | 10    | 0 |                                                                                   |    | <a href="http://research2.kahaku.go.jp/ujsb/search">http://research2.kahaku.go.jp/ujsb/search</a>                                         |
|  |                    | Echinoidea    |                  | 161 |   | ND | ND  | 161   | 0 | 1 (Michio Shigei)                                                                 | 2  | Shigei M (2006) A systematical study on the echinoids (Echinoermata, Echinoidea) from the Sagami Sea. Mem Nat Sci Mus, Tokyo 41: 305-327. |
|  |                    |               | Cassiduloidea    | 4   | 3 | ND | ND  | 4     | 0 |                                                                                   |    | <a href="http://research2.kahaku.go.jp/ujsb/search">http://research2.kahaku.go.jp/ujsb/search</a>                                         |
|  |                    |               | Cidaroida        | 25  | 4 | ND | ND  | 25    | 0 |                                                                                   |    |                                                                                                                                           |
|  |                    |               | Clypeasteroida   | 25  | 4 | ND | ND  | 25    | 0 |                                                                                   |    |                                                                                                                                           |
|  |                    |               | Diadematoidea    | 18  | 4 | ND | ND  | 18    | 0 |                                                                                   |    |                                                                                                                                           |
|  |                    |               | Echinoida        | 35  | 4 | ND | ND  | 35    | 0 |                                                                                   |    |                                                                                                                                           |
|  |                    |               | Echinothurioida  | 11  | 4 | ND | ND  | 11    | 0 |                                                                                   |    |                                                                                                                                           |
|  |                    |               | Holactypoida     | 2   | 3 | ND | ND  | 2     | 0 |                                                                                   |    |                                                                                                                                           |
|  |                    |               | Spatangoida      | 41  | 4 | ND | ND  | 41    | 0 |                                                                                   |    |                                                                                                                                           |
|  |                    | Holothuroidea |                  | 192 |   | ND | ND  | 192   | 0 | 1 (Tohru Imaoka)                                                                  | 2  |                                                                                                                                           |
|  |                    |               | Apodida          | 31  | 4 | ND | ND  | 31    | 0 |                                                                                   |    |                                                                                                                                           |
|  |                    |               | Aspidochirotida  | 65  | 4 | ND | ND  | 65    | 0 |                                                                                   |    |                                                                                                                                           |
|  |                    |               | Dactylochirotida | 5   | 3 | ND | ND  | 5     | 0 |                                                                                   |    |                                                                                                                                           |
|  |                    |               | Dendrochirotida  | 50  | 4 | ND | ND  | 50    | 0 |                                                                                   |    |                                                                                                                                           |
|  |                    |               | Elapsipodida     | 26  | 4 | ND | ND  | 26    | 0 |                                                                                   |    |                                                                                                                                           |
|  |                    |               | Molpadiida       | 15  | 4 | ND | ND  | 15    | 0 |                                                                                   |    |                                                                                                                                           |
|  |                    | Ophiuroidea   |                  | 308 |   | ND | ND  | 308   | 0 | 2 (Toshihiko Fujita: NMNS, Seiichi Irimura: NMNS)                                 | 1  | 入村精一 (1982) 相模湾産蛇尾類. 東京: 丸善. 95 p.                                                                                                        |
|  |                    |               | Ophiurida        | 256 | 5 | ND | ND  | 256   | 0 |                                                                                   |    |                                                                                                                                           |
|  |                    |               | Euryalida        | 52  | 4 | ND | ND  | 52    | 0 |                                                                                   |    |                                                                                                                                           |
|  | Echiura            |               |                  | 21  |   | ND | ND  | 21    | 0 | 1 (Teruaki Nishikawa: Toho University)                                            | >2 | <a href="http://research2.kahaku.go.jp/ujsb/search">http://research2.kahaku.go.jp/ujsb/search</a>                                         |
|  |                    | Echiura       |                  | 21  |   | ND | ND  | 21    | 0 |                                                                                   |    |                                                                                                                                           |
|  |                    |               | Echiuroinea      | 20  | 4 | ND | ND  | 20    | 0 |                                                                                   |    |                                                                                                                                           |
|  |                    |               | Xenopneusta      | 1   | 3 | ND | ND  | 1     | 0 |                                                                                   |    |                                                                                                                                           |
|  | Ectoprocta/Bryozoa |               |                  | 300 | 5 | ND | 900 | 1,200 | 0 | 2 (Hiroshi Kajihara: Hokkaido University, Shunsuke Mawatari: Hokkaido University) | ND |                                                                                                                                           |
|  | Entoprocta         |               |                  | 41  |   | 33 | 210 | 251   | 0 | 1 (Tohru Iseto: Kyoto University)                                                 | 1  |                                                                                                                                           |
|  |                    |               | Barentsiidae     | 8   | 3 | 2  | 5   | 13    | 0 |                                                                                   |    |                                                                                                                                           |
|  |                    |               | Loxokalypodidae  | 0   | 1 | 0  | 1   | 1     | 0 |                                                                                   |    |                                                                                                                                           |
|  |                    |               | Loxosomatidae    | 30  | 4 | 30 | 200 | 230   | 0 |                                                                                   |    |                                                                                                                                           |

|  |                 |                 |       |   |     |       |       |    |                                                                            |     |                                                                                                                                                         |
|--|-----------------|-----------------|-------|---|-----|-------|-------|----|----------------------------------------------------------------------------|-----|---------------------------------------------------------------------------------------------------------------------------------------------------------|
|  |                 | Pedicellinidae  | 3     | 3 | 1   | 4     | 7     | 0  |                                                                            |     |                                                                                                                                                         |
|  | Gastrotricha    |                 | 12    |   | 3   | 100   | 112   | 0  | 1 (Yoshihisa Shirayama: Kyoto University)                                  | 0   |                                                                                                                                                         |
|  |                 | Gastrotricha    | 12    |   | 3   | 100   | 112   | 0  |                                                                            |     |                                                                                                                                                         |
|  |                 | Chaetonotida    | 6     | 3 | 2   | 50    | 56    | 0  |                                                                            |     |                                                                                                                                                         |
|  |                 | Macrodasyida    | 6     | 3 | 1   | 50    | 56    | 0  |                                                                            |     |                                                                                                                                                         |
|  | Gnathostomulida |                 | 5     |   | 0   | 100   | 105   | 0  | 1 (Yoshihisa Shirayama: Kyoto University)                                  |     | Wolfgang Sterr, Personal Communication                                                                                                                  |
|  |                 | Bursovaginoidea | 5     | 3 | 0   | 95    | 100   | 0  |                                                                            |     |                                                                                                                                                         |
|  |                 | Filospermoidea  | 0     | 1 | 0   | 5     | 5     | 0  |                                                                            |     |                                                                                                                                                         |
|  | Hemichordata    |                 | 11    |   | ND  | 10    | 21    | 0  | 1 (Teruaki Nishikawa: Toho University)                                     | >2  | <a href="http://research2.kahaku.go.jp/ujsb/search">http://research2.kahaku.go.jp/ujsb/search</a>                                                       |
|  |                 | Enteropneusta   | 8     |   | ND  | ND    | 8     | 0  |                                                                            |     |                                                                                                                                                         |
|  |                 | Harrimaniidae   | 2     | 3 | ND  | ND    | 2     | 0  |                                                                            |     |                                                                                                                                                         |
|  |                 | Ptychoderidae   | 3     | 3 | ND  | ND    | 3     | 0  |                                                                            |     |                                                                                                                                                         |
|  |                 | Saxipendiidae   | 1     | 3 | ND  | ND    | 1     | 0  |                                                                            |     |                                                                                                                                                         |
|  |                 | Spengeliidae    | 2     | 3 | ND  | ND    | 2     | 0  |                                                                            |     |                                                                                                                                                         |
|  |                 | Pterobranchia   | 3     | 3 | ND  | ND    | 3     | 0  |                                                                            |     |                                                                                                                                                         |
|  | Kinorhyncha     |                 | 7     |   | 4   | 100   | 107   | 0  | 1 (Yoshihisa Shirayama: Kyoto University)                                  | 0   |                                                                                                                                                         |
|  |                 | Kinorhyncha     | 7     | 3 | 4   | 100   | 107   | 0  |                                                                            |     |                                                                                                                                                         |
|  | Loricifera      |                 | 1     |   | 1   | 10    | 11    | 0  |                                                                            |     |                                                                                                                                                         |
|  |                 | Loricifera      | 1     |   | 1   | 10    | 11    | 0  |                                                                            |     |                                                                                                                                                         |
|  |                 | Nanaloricida    | 1     | 3 | 1   | 10    | 11    | 0  |                                                                            |     |                                                                                                                                                         |
|  | Mollusca        |                 | 8,658 |   | 334 | 1,180 | 9,838 | 11 |                                                                            |     |                                                                                                                                                         |
|  |                 | Bivalvia        | 1,252 |   | 46  | 64    | 1,316 | 7  | 3 (Takashi Okutani: JAMSTEC, Akihiko Matsukuma: Kyushu University, et al.) | >10 | Higo S, Callomon P, Goto Y (1999) Catalogue and bibliography of the marine shell-bearing Mollusca of Japan. Osaka: Elle Scientific Publications. 749 p. |
|  |                 | Arcoidea        | 79    | 5 | ND  | 9     | 88    | 0  |                                                                            |     |                                                                                                                                                         |
|  |                 | Limoida         | 34    | 5 | ND  | 3     | 37    | 0  |                                                                            |     |                                                                                                                                                         |
|  |                 | Myoida          | 70    | 5 | ND  | 2     | 72    | 0  |                                                                            |     |                                                                                                                                                         |
|  |                 | Mytiloida       | 96    | 5 | ND  | 5     | 101   | 4  |                                                                            |     |                                                                                                                                                         |
|  |                 | Nuculoida       | 79    | 5 | ND  | 2     | 81    | 0  |                                                                            |     |                                                                                                                                                         |
|  |                 | Ostreoida       | 25    | 5 | ND  | 0     | 25    | 0  |                                                                            |     |                                                                                                                                                         |
|  |                 | Pectinoida      | 114   | 5 | ND  | 2     | 116   | 0  |                                                                            |     |                                                                                                                                                         |
|  |                 | Pholadomyoida   | 96    | 5 | ND  | 0     | 96    | 0  |                                                                            |     |                                                                                                                                                         |
|  |                 | Pteroida        | 44    | 5 | ND  | 3     | 47    | 0  |                                                                            |     |                                                                                                                                                         |
|  |                 | Solemyoida      | 9     | 5 | ND  | 1     | 10    | 0  |                                                                            |     |                                                                                                                                                         |
|  |                 | Veneroida       | 606   | 5 | ND  | 37    | 643   | 3  |                                                                            |     |                                                                                                                                                         |
|  |                 | Caudofoveata    | 3     |   | ND  | 25    | 28    | 0  | 1 (Hiroshi Saito: NMNS)                                                    |     | <a href="http://research2.kahaku.go.jp/ujsb/search">http://research2.kahaku.go.jp/ujsb/search</a>                                                       |
|  |                 | Chaetodermatida | 3     | 3 | ND  | 25    | 28    | 0  |                                                                            |     |                                                                                                                                                         |

|  |  |                |                     |       |   |     |     |       |   |                                                                            |     |                                                                                                                                                         |
|--|--|----------------|---------------------|-------|---|-----|-----|-------|---|----------------------------------------------------------------------------|-----|---------------------------------------------------------------------------------------------------------------------------------------------------------|
|  |  | Cephalopoda    |                     | 204   |   | ND  | 5   | 209   | 0 | 3 (Takashi Okutani: JAMSTEC, Tsunemi Kubodera: NMNS, et al.)               |     | 土屋光太郎・阿部秀樹・山本典暎 (2002) イカ・タコガイドブック. 東京: TBSブリタニカ. 139 p.                                                                                                |
|  |  |                | Nautiloidea         | 1     | 5 | ND  | 0   | 1     | 0 |                                                                            |     |                                                                                                                                                         |
|  |  |                | Octopoda            | 61    | 5 | ND  | 2   | 63    | 0 |                                                                            |     |                                                                                                                                                         |
|  |  |                | Sepioida            | 22    | 5 | ND  | 1   | 23    | 0 |                                                                            |     |                                                                                                                                                         |
|  |  |                | Sepiolida           | 15    | 5 | ND  | 0   | 15    | 0 |                                                                            |     |                                                                                                                                                         |
|  |  |                | Teuthoidea          | 104   | 5 | ND  | 2   | 106   | 0 |                                                                            |     |                                                                                                                                                         |
|  |  |                | Vampyromorpha       | 1     | 5 | ND  | 0   | 1     | 0 |                                                                            |     |                                                                                                                                                         |
|  |  | Gastropoda     |                     | 7,013 |   | 286 | 965 | 7,978 | 4 | 6 (Takashi Okutani: JAMSTEC, Takenori Sasaki: University of Tokyo, et al.) | >10 | Higo S, Callomon P, Goto Y (1999) Catalogue and bibliography of the marine shell-bearing Mollusca of Japan. Osaka: Elle Scientific Publications. 749 p. |
|  |  |                | Acochliidae         | 0     | 5 | ND  | 2   | 2     | 0 |                                                                            |     |                                                                                                                                                         |
|  |  |                | Aplysiomorpha       | 21    | 5 | ND  | 5   | 26    | 0 |                                                                            |     |                                                                                                                                                         |
|  |  |                | Basommatophora      | 13    | 5 | ND  | 0   | 13    | 0 |                                                                            |     |                                                                                                                                                         |
|  |  |                | Cephalaspidea       | 279   | 4 | ND  | 72  | 351   | 0 |                                                                            |     |                                                                                                                                                         |
|  |  |                | Cocculiniformia     | 14    | 5 | ND  | 3   | 17    | 0 |                                                                            |     |                                                                                                                                                         |
|  |  |                | Discopoda           | 973   | 5 | ND  | 182 | 1,155 | 3 |                                                                            |     |                                                                                                                                                         |
|  |  |                | Eupulmonata         | 32    | 5 | ND  | 0   | 32    | 0 |                                                                            |     |                                                                                                                                                         |
|  |  |                | Gymnosomata         | 9     | 5 | ND  | 0   | 9     | 0 |                                                                            |     |                                                                                                                                                         |
|  |  |                | Heteropoda          | 23    | 5 | ND  | 0   | 23    | 0 |                                                                            |     |                                                                                                                                                         |
|  |  |                | Heterostropha       | 583   | 5 | ND  | 137 | 720   | 0 |                                                                            |     |                                                                                                                                                         |
|  |  |                | Neogastropoda       | 2,034 | 5 | ND  | 140 | 2,174 | 0 |                                                                            |     |                                                                                                                                                         |
|  |  |                | Neomphalina         | 1     | 5 | ND  | 0   | 1     | 0 |                                                                            |     |                                                                                                                                                         |
|  |  |                | Neritimorpha        | 97    | 5 | ND  | 12  | 109   | 0 |                                                                            |     |                                                                                                                                                         |
|  |  |                | Nudibranchia        | 435   | 4 | ND  | 200 | 635   | 1 |                                                                            |     |                                                                                                                                                         |
|  |  |                | Patellogastropoda   | 52    | 5 | ND  | 1   | 53    | 0 |                                                                            |     |                                                                                                                                                         |
|  |  |                | Pleurobranchomorpha | 16    | 4 | ND  | 5   | 21    | 0 |                                                                            |     |                                                                                                                                                         |
|  |  |                | Ptenoglossa         | 465   | 5 | ND  | 95  | 560   | 0 |                                                                            |     |                                                                                                                                                         |
|  |  |                | Runcinacea          | 2     | 5 | ND  | 0   | 2     | 0 |                                                                            |     |                                                                                                                                                         |
|  |  |                | Saccoglossa         | 69    | 5 | ND  | 10  | 79    | 0 |                                                                            |     |                                                                                                                                                         |
|  |  |                | Sorbeoconcha        | 1,375 | 5 | ND  | 1   | 1,376 | 0 |                                                                            |     |                                                                                                                                                         |
|  |  |                | Systemmatophora     | 6     | 3 | ND  | 5   | 11    | 0 |                                                                            |     |                                                                                                                                                         |
|  |  |                | Thecosomata         | 33    | 5 | ND  | 0   | 33    | 0 |                                                                            |     |                                                                                                                                                         |
|  |  |                | Vetigastropoda      | 481   | 5 | ND  | 95  | 576   | 0 |                                                                            |     |                                                                                                                                                         |
|  |  | Polyplacophora |                     | 129   |   | ND  | 48  | 177   | 0 | 1 (Hiroshi Saito: NMNS)                                                    | >2  | 瀧巖 (1965) 多板綱. In: 岡田要・内田清之助・内田亨, 編. 新日本動物図鑑 (中). 東京: 北隆館 803 p.                                                                                        |
|  |  |                | Neoloricata         | 129   | 4 | ND  | 48  | 177   | 0 |                                                                            |     |                                                                                                                                                         |

|  |              |               |                     |     |   |    |         |         |   |                                           |    |                                                                                                                                                                              |
|--|--------------|---------------|---------------------|-----|---|----|---------|---------|---|-------------------------------------------|----|------------------------------------------------------------------------------------------------------------------------------------------------------------------------------|
|  |              | Scaphopoda    |                     | 47  |   | 2  | 0       | 47      | 0 | 1 (Takashi Okutani: JAMSTEC)              |    | <a href="http://research2.kahaku.go.jp/ujssb/search">http://research2.kahaku.go.jp/ujssb/search</a>                                                                          |
|  |              |               | Dentaliida          | 25  | 5 | 0  | 0       | 25      | 0 |                                           |    |                                                                                                                                                                              |
|  |              |               | Gadiliida           | 22  | 5 | 2  | 0       | 22      | 0 |                                           |    |                                                                                                                                                                              |
|  |              | Solenogastres |                     | 10  |   | ND | 73      | 83      | 0 | 1 (Hiroshi Saito: NMNS)                   | 0  |                                                                                                                                                                              |
|  |              |               | Cavibelonia         | 9   | 3 | ND | 60      | 69      | 0 |                                           |    |                                                                                                                                                                              |
|  |              |               | Neomeniamorpha      | 1   | 3 | ND | 7       | 8       | 0 |                                           |    |                                                                                                                                                                              |
|  |              |               | Pholidoskepia       | 0   | 1 | ND | 5       | 5       | 0 |                                           |    |                                                                                                                                                                              |
|  |              |               | Sterrofungia        | 0   | 1 | ND | 1       | 1       | 0 |                                           |    |                                                                                                                                                                              |
|  | Myxozoa      |               |                     | 62  |   | 6  | ND      | 62      | 2 | 1 (Hiroshi Yokoyama: University of Tokyo) | 6  | Eiras JC (2006) Synopsis of the species of <i>Ceratomyxa</i> Thelohan, 1892 (Myxozoa: Myxosporae: Ceratomyxidae) . Syst Parasit 65: 49-71.                                   |
|  |              | Myxosporae    |                     | 62  |   | 6  | ND      | 62      | 2 |                                           |    |                                                                                                                                                                              |
|  |              |               | Bivalvulida         | 47  | 4 | 6  | ND      | 47      | 1 |                                           |    |                                                                                                                                                                              |
|  |              |               | Multivalvulida      | 15  | 4 | ND | ND      | 15      | 1 |                                           |    |                                                                                                                                                                              |
|  | Nematoda     |               |                     | 70  |   | 35 | 115,010 | 115,080 | 0 | 1 (Yoshihisa Shirayama: Kyoto University) | >1 | Yoshikawa N (2002) Brief review of Japanese researches on free living marine nematodes. In: Nakasone K, editor. Progress in Nematology, Tsukuba: Jpn Soc Nematol. pp. 64-70. |
|  |              | Adenophorea   |                     | 69  |   | 35 | 115,000 | 115,069 | 0 |                                           |    |                                                                                                                                                                              |
|  |              |               | Araeolaimida        | 2   | 3 | 1  | 10,000  | 10,002  | 0 |                                           |    |                                                                                                                                                                              |
|  |              |               | Chromadorida        | 29  | 4 | 16 | 30,000  | 30,029  | 0 |                                           |    |                                                                                                                                                                              |
|  |              |               | Desmodora           | 9   | 3 | 6  | 20,000  | 20,009  | 0 |                                           |    |                                                                                                                                                                              |
|  |              |               | Desmoscolecida      | 0   | 1 | 0  | 5,000   | 5,000   | 0 |                                           |    |                                                                                                                                                                              |
|  |              |               | Enoplida            | 18  | 4 | 9  | 20,000  | 20,018  | 0 |                                           |    |                                                                                                                                                                              |
|  |              |               | Monhysterida        | 11  | 4 | 3  | 30,000  | 30,011  | 0 |                                           |    |                                                                                                                                                                              |
|  |              | Secernentea   |                     | 1   |   | 0  | 10      | 11      | 0 |                                           |    |                                                                                                                                                                              |
|  |              |               | Rhabditida          | 1   | 3 | 0  | 10      | 11      | 0 |                                           |    |                                                                                                                                                                              |
|  | Nematomorpha |               |                     | 1   |   | 1  | 100     | 101     | 0 |                                           | 0  |                                                                                                                                                                              |
|  |              | Nematomorpha  |                     | 1   |   | 1  | 100     | 101     | 0 |                                           |    |                                                                                                                                                                              |
|  |              |               | Nectonematoida      | 1   | 3 | 1  | 100     | 101     | 0 |                                           |    |                                                                                                                                                                              |
|  | Nemertea     |               |                     | 120 |   | ND | 58      | 178     | 0 | 1 (Hiroshi Kajihara: Hokkaido University) | ND | <a href="http://research2.kahaku.go.jp/ujssb/search">http://research2.kahaku.go.jp/ujssb/search</a>                                                                          |
|  |              | Hoploneurtea  |                     | 57  |   | ND | 36      | 93      | 0 |                                           |    |                                                                                                                                                                              |
|  |              |               | Amphiporidae        | 14  | 4 | ND | 10      | 24      | 0 |                                           |    |                                                                                                                                                                              |
|  |              |               | Carcinonemertidae   | 1   | 5 | ND | 0       | 1       | 0 |                                           |    |                                                                                                                                                                              |
|  |              |               | Cratenemertidae     | 3   | 3 | ND | 3       | 6       | 0 |                                           |    |                                                                                                                                                                              |
|  |              |               | Emplectonematidae   | 10  | 4 | ND | 3       | 13      | 0 |                                           |    |                                                                                                                                                                              |
|  |              |               | Malacobdellidae     | 1   | 5 | ND | 0       | 1       | 0 |                                           |    |                                                                                                                                                                              |
|  |              |               | Ototyphlonemertidae | 3   | 3 | ND | 3       | 6       | 0 |                                           |    |                                                                                                                                                                              |

|  |                 |                    |     |   |    |     |       |   |                                                                                   |    |                                                                                                   |
|--|-----------------|--------------------|-----|---|----|-----|-------|---|-----------------------------------------------------------------------------------|----|---------------------------------------------------------------------------------------------------|
|  |                 | Pelagica           | 2   | 5 | ND | 0   | 2     | 0 |                                                                                   |    |                                                                                                   |
|  |                 | Reptantia          | 3   | 3 | ND | 4   | 7     | 0 |                                                                                   |    |                                                                                                   |
|  |                 | Poseidonemertidae  | 1   | 3 | ND | 4   | 5     | 0 |                                                                                   |    |                                                                                                   |
|  |                 | Prosorhochmidae    | 2   | 3 | ND | 3   | 5     | 0 |                                                                                   |    |                                                                                                   |
|  |                 | Tetrastemmatidae   | 17  | 4 | ND | 6   | 23    | 0 |                                                                                   |    |                                                                                                   |
|  |                 | Palaeonemertea     | 11  |   | ND | 4   | 15    | 0 |                                                                                   |    |                                                                                                   |
|  |                 | Callineridae       | 1   | 4 | ND | ND  | ND    | 0 |                                                                                   |    |                                                                                                   |
|  |                 | Cephalotrichidae   | 3   | 3 | ND | 2   | 5     | 0 |                                                                                   |    |                                                                                                   |
|  |                 | Tubulanidae        | 7   | 4 | ND | 2   | 9     | 0 |                                                                                   |    |                                                                                                   |
|  |                 | Pilidiophora       | 52  |   | ND | 18  | 70    | 0 |                                                                                   |    |                                                                                                   |
|  |                 | Gorgonorhynchidae  | 0   | 1 | ND | 1   | 1     | 0 |                                                                                   |    |                                                                                                   |
|  |                 | Hubrechtidae       | 3   | 4 | ND | 1   | 4     | 0 |                                                                                   |    |                                                                                                   |
|  |                 | Lineidae           | 42  | 4 | ND | 15  | 57    | 0 |                                                                                   |    |                                                                                                   |
|  |                 | Valenciniidae      | 7   | 5 | ND | 1   | 8     | 0 |                                                                                   |    |                                                                                                   |
|  | Orthonecta      |                    | 1   | 3 | ND | 3   | 4     | 0 | 1 (Hidetaka Furuya: Osaka University)                                             | ND |                                                                                                   |
|  | Phoronida       |                    | 2   |   | ND | ND  | 2     | 0 | 2 (Hiroshi Kajihara: Hokkaido University, Shunsuke Mawatari: Hokkaido University) | ND | <a href="http://research2.kahaku.go.jp/ujsb/search">http://research2.kahaku.go.jp/ujsb/search</a> |
|  |                 | Phoranidea         | 2   |   | ND | ND  | 2     | 0 |                                                                                   |    |                                                                                                   |
|  |                 | Phoronidae         | 2   | 3 | ND | ND  | 2     | 0 |                                                                                   |    |                                                                                                   |
|  | Placozoa        |                    | 1   | 3 | ND | ND  | 1     | 0 | 1 (Hiroshi Kajihara: Hokkaido University)                                         | ND |                                                                                                   |
|  | Platyhelminthes |                    | 188 |   | ND | 350 | 538   | 0 | 2 (Ken-ichi Tajika: Nihon University, Morio Hagiya: Atsugi-nishi High School)     | 1  |                                                                                                   |
|  |                 | Catenulida         | 0   |   | ND | 50  | 50    | 0 |                                                                                   |    |                                                                                                   |
|  |                 | Catenulida         | 0   | 1 | ND | 50  | 50    | 0 |                                                                                   |    |                                                                                                   |
|  |                 | Eulecithophora     | 37  |   | ND | 100 | 137   | 0 |                                                                                   |    |                                                                                                   |
|  |                 | Dalyellioida       | 5   | 3 | ND | ND  | 5     | 0 |                                                                                   |    |                                                                                                   |
|  |                 | Tricladida         | 6   | 3 | ND | ND  | 6     | 0 |                                                                                   |    |                                                                                                   |
|  |                 | Proseriata         | 26  | 4 | ND | 100 | 126   | 0 |                                                                                   |    |                                                                                                   |
|  |                 | Urastomatida       | ND  | 1 | ND | ND  | ND    | 0 |                                                                                   |    |                                                                                                   |
|  |                 | Lecithoepitheliata | 0   |   | ND | 50  | 50    | 0 |                                                                                   |    |                                                                                                   |
|  |                 | Prorhynchidae      | 0   | 1 | ND | 50  | 50    | 0 |                                                                                   |    |                                                                                                   |
|  |                 | Macrostomorpha     | 1   |   | ND | 50  | 51    | 0 |                                                                                   |    |                                                                                                   |
|  |                 | Macrostomida       | 1   | 3 | ND | 50  | 51    | 0 |                                                                                   |    |                                                                                                   |
|  |                 | Polycladida        | 150 |   | ND | 100 | 250   | 0 |                                                                                   |    |                                                                                                   |
|  |                 | Polycladida        | 150 | 5 | ND | 100 | 250   | 0 |                                                                                   |    |                                                                                                   |
|  | Porifera        |                    | 745 |   | ND | 540 | 1,285 | 0 | 1 (Yuji Ise: University of Tokyo)                                                 | 2  |                                                                                                   |
|  |                 | Calcarea           | 130 |   | ND | 20  | 150   | 0 |                                                                                   |    | Ogawa K (2006) Porifera of the Sagami                                                             |

|  |            |                  |     |   |    |     |       |   |                                           |    |                                                                                                                                                                   |
|--|------------|------------------|-----|---|----|-----|-------|---|-------------------------------------------|----|-------------------------------------------------------------------------------------------------------------------------------------------------------------------|
|  |            |                  |     |   |    |     |       |   |                                           |    | Sea. Mem Nat Sci Mus Tokyo 40: 23-56.                                                                                                                             |
|  |            | Baerida          | 2   | 3 | ND | 1   | 3     | 0 |                                           |    |                                                                                                                                                                   |
|  |            | Clathrinida      | 17  | 4 | ND | 8   | 25    | 0 |                                           |    |                                                                                                                                                                   |
|  |            | Leucosolenida    | 110 | 5 | ND | 10  | 120   | 0 |                                           |    |                                                                                                                                                                   |
|  |            | Lithonida        | 1   | 3 | ND | 1   | 2     | 0 |                                           |    |                                                                                                                                                                   |
|  |            | Demospongiae     | 537 |   | ND | 500 | 1,037 | 0 |                                           | 3  | <a href="http://research2.kahaku.go.jp/ujssb/search">http://research2.kahaku.go.jp/ujssb/search</a>                                                               |
|  |            | Agelasida        | 2   | 3 | ND | 10  | 12    | 0 |                                           |    | Hoshino T (1985) Description of two new species in the genus <i>Agelas</i> (Demospongia) from Zamami Island, the Ryukyus, Japan. Pro Jap Spci Syst Zool 30: 1-10. |
|  |            | Astrophorida     | 83  | 4 | ND | 30  | 113   | 0 |                                           |    | 谷田専治 (1989) 相模湾産尋常海綿類. 東京: 丸善. 197 p.                                                                                                                             |
|  |            | Chondrosida      | 3   | 3 | ND | 5   | 8     | 0 |                                           |    |                                                                                                                                                                   |
|  |            | Dendroceratida   | 3   | 3 | ND | 15  | 18    | 0 |                                           |    |                                                                                                                                                                   |
|  |            | Dictyoceratida   | 20  | 4 | ND | 15  | 35    | 0 |                                           |    |                                                                                                                                                                   |
|  |            | Hadromerida      | 63  | 4 | ND | 100 | 163   | 0 |                                           |    |                                                                                                                                                                   |
|  |            | Halichondrida    | 65  | 4 | ND | 80  | 145   | 0 |                                           |    |                                                                                                                                                                   |
|  |            | Halisarcida      | 0   | 1 | ND | 2   | 2     | 0 |                                           |    |                                                                                                                                                                   |
|  |            | Haplosclerida    | 105 | 5 | ND | 80  | 185   | 0 |                                           |    |                                                                                                                                                                   |
|  |            | Homoscleromorpha | 4   | 3 | ND | 3   | 7     | 0 |                                           |    |                                                                                                                                                                   |
|  |            | "Lithistida"     | 11  | 4 | ND | 30  | 41    | 0 |                                           |    |                                                                                                                                                                   |
|  |            | Poecilosclerida  | 158 | 5 | ND | 100 | 258   | 0 |                                           |    |                                                                                                                                                                   |
|  |            | Spirophorida     | 20  | 4 | ND | 20  | 40    | 0 |                                           |    |                                                                                                                                                                   |
|  |            | Verongida        | 0   | 1 | ND | 10  | 10    | 0 |                                           |    |                                                                                                                                                                   |
|  |            | Hexactinellida   | 78  |   | ND | 20  | 98    | 0 |                                           | 14 | Hoshino T (1985) Description of two new species in the genus <i>Agelas</i> (Demospongia) from Zamami Island, the Ryukyus, Japan. Pro Jap Spci Syst Zool 30: 1-10. |
|  |            | Amphidiscosida   | 16  | 4 | ND | 6   | 22    | 0 |                                           |    |                                                                                                                                                                   |
|  |            | Hexactinosida    | 21  | 4 | ND | 7   | 28    | 0 |                                           |    |                                                                                                                                                                   |
|  |            | Lyssacinosida    | 41  | 4 | ND | 7   | 48    | 0 |                                           |    |                                                                                                                                                                   |
|  | Priapulida |                  | 2   |   | 0  | 20  | 22    | 0 | 1 (Yoshihisa Shirayama: Kyoto University) | 0  | <a href="http://research2.kahaku.go.jp/ujssb/search">http://research2.kahaku.go.jp/ujssb/search</a>                                                               |
|  | Priapula   |                  | 2   |   | 0  | 20  | 22    | 0 |                                           |    |                                                                                                                                                                   |
|  |            | Maccabeidae      | 0   | 1 | 0  | 5   | 5     | 0 |                                           |    |                                                                                                                                                                   |
|  |            | Priapulidae      | 2   | 3 | 0  | 10  | 12    | 0 |                                           |    |                                                                                                                                                                   |
|  |            | Tubiluchidae     | 0   | 1 | 0  | 5   | 5     | 0 |                                           |    |                                                                                                                                                                   |
|  | Rotifera   |                  | 397 |   | ND | 1   | 398   | 0 | 1 (Minoru Sudzuki: Nihon University)      | 0  |                                                                                                                                                                   |
|  |            | Archeorotatoria  | 83  |   | ND | 0   | 83    | 0 |                                           |    |                                                                                                                                                                   |
|  |            | Bdelloidea       | 83  | 5 | ND | 0   | 83    | 0 |                                           |    |                                                                                                                                                                   |

|  |            |                   |                      |        |   |       |         |         |    |                                        |                                                                                                                         |
|--|------------|-------------------|----------------------|--------|---|-------|---------|---------|----|----------------------------------------|-------------------------------------------------------------------------------------------------------------------------|
|  |            | Eurotatoria       |                      | 313    |   | ND    | 0       | 313     | 0  |                                        |                                                                                                                         |
|  |            |                   | Antrorsiramida       | 15     | 5 | ND    | 0       | 15      | 0  |                                        |                                                                                                                         |
|  |            |                   | Protoramida          | 30     | 5 | ND    | 0       | 30      | 0  |                                        |                                                                                                                         |
|  |            |                   | Salitiramida         | 13     | 5 | ND    | 0       | 13      | 0  |                                        |                                                                                                                         |
|  |            |                   | Septiramida          | 48     | 5 | ND    | 0       | 48      | 0  |                                        |                                                                                                                         |
|  |            |                   | Transversiramida     | 207    | 5 | ND    | 1       | 208     | 0  |                                        |                                                                                                                         |
|  |            | Hemirotatoria     |                      | 1      |   | ND    | 0       | 1       | 0  |                                        |                                                                                                                         |
|  |            |                   | Paedotrochida        | 1      | 3 | ND    | 0       | 1       | 0  |                                        |                                                                                                                         |
|  | Sipuncula  |                   |                      | 47     |   | ND    | ND      | 47      | 0  | 1 (Teruaki Nishikawa: Toho University) | >2                                                                                                                      |
|  |            | Sipunculidea      |                      | 28     |   | ND    | ND      | 28      | 0  |                                        |                                                                                                                         |
|  |            |                   | Golfingiiiformes     | 23     | 4 | ND    | ND      | 23      | 0  |                                        |                                                                                                                         |
|  |            |                   | Sipunculiformes      | 5      | 3 | ND    | ND      | 5       | 0  |                                        |                                                                                                                         |
|  |            | Phascolosomatidea |                      | 19     |   | ND    | ND      | 19      | 0  |                                        |                                                                                                                         |
|  |            |                   | Aspidosiphoniiformes | 10     | 4 | ND    | ND      | 10      | 0  |                                        |                                                                                                                         |
|  |            |                   | Phascolosomatiformes | 9      | 3 | ND    | ND      | 9       | 0  |                                        |                                                                                                                         |
|  | Tardigrade |                   |                      | 14     |   | ND    | 9       | 23      | 0  | 3                                      | ND                                                                                                                      |
|  |            | Heterotardigrada  |                      | 13     |   | ND    | 9       | 22      | 0  |                                        | <a href="http://homepage3.nifty.com/cxj11255/jtard/index.html">http://homepage3.nifty.com/cxj11255/jtard/index.html</a> |
|  |            |                   | Arthrotardigrada     | 13     | 4 | ND    | 9       | 22      | 0  |                                        |                                                                                                                         |
|  |            | Eutardigrada      |                      | 1      |   | ND    | ND      | 1       | 0  |                                        |                                                                                                                         |
|  |            |                   | Parachela            | 1      | 3 | ND    | ND      | 1       | 0  |                                        |                                                                                                                         |
|  |            |                   | Total                | 33,629 |   | 1,872 | 121,913 | 155,542 | 39 |                                        |                                                                                                                         |

<sup>1</sup>略語説明は Table 2 参照.



Table S4. 各門における日本近海の出現種数（NDS），今後出現が記録される種数（NUS），推定種数（ENS）。

| Domain   | Phylum/Division    | NDS   | NUS     | ENS     |
|----------|--------------------|-------|---------|---------|
| Eukarya  | Mollusca           | 8,658 | 1,180   | 9,838   |
| Eukarya  | Arthropoda         | 6,393 | 1,677   | 8,070   |
| Eukarya  | Chordata           | 4,330 | 326     | 4,656   |
| Eukarya  | Granuloreticulosa  | 2,321 | 490     | 2,811   |
| Eukarya  | Cnidaria           | 1,876 | 364     | 2,240   |
| Eukarya  | Heterokontophyta   | 1,207 | ND      | 1,207   |
| Eukarya  | Annelida           | 1,076 | 124     | 1,200   |
| Eukarya  | Echinodermata      | 1,052 | ND      | 1,052   |
| Eukarya  | Rhodophyta         | 898   | ND      | 898     |
| Eukarya  | Porifera           | 745   | 540     | 1,285   |
| Eukarya  | Ciliophora         | 530   | ND      | 530     |
| Eukarya  | Dinomastigota      | 470   | ND      | 470     |
| Eukarya  | Radiozoa           | 405   | 100     | 505     |
| Eukarya  | Rotifera           | 397   | 1       | 398     |
| Bacteria | Proteobacteria     | 395   | ND      | 395     |
| Eukarya  | Haptophyta         | 304   | ND      | 304     |
| Eukarya  | Ectoprocta         | 300   | 900     | 1,200   |
| Eukarya  | Ascomycota         | 294   | ND      | 294     |
| Eukarya  | Chlorophyta        | 248   | ND      | 248     |
| Eukarya  | Platyhelminthes    | 188   | 350     | 538     |
| Bacteria | Firmicutes         | 172   | ND      | 172     |
| Eukarya  | Cercozoa           | 143   | 4       | 147     |
| Bacteria | Bacteroides        | 125   | ND      | 125     |
| Bacteria | Actinobacteria     | 123   | ND      | 123     |
| Eukarya  | Dicyemida          | 120   | 30      | 150     |
| Eukarya  | Nemertea           | 120   | 58      | 178     |
| Eukarya  | Brachiopoda        | 73    | 27      | 100     |
| Eukarya  | Nematoda           | 70    | 115,010 | 115,080 |
| Eukarya  | Basidiomycota      | 65    | ND      | 65      |
| Eukarya  | Myxozoa            | 62    | ND      | 62      |
| Eukarya  | Choanozoa          | 54    | ND      | 54      |
| Eukarya  | Sipuncula          | 47    | ND      | 47      |
| Eukarya  | Magnoliopsida      | 44    | ND      | 44      |
| Eukarya  | Ctenophora         | 41    | 13      | 54      |
| Eukarya  | Entoprocta         | 41    | 210     | 251     |
| Eukarya  | Labyrinthulomycota | 40    | ND      | 40      |
| Eukarya  | Chaetognatha       | 36    | 6       | 42      |
| Eukarya  | Echiura            | 21    | ND      | 21      |
| Eukarya  | Euglenophyta       | 14    | ND      | 14      |
| Eukarya  | Tardigrade         | 14    | 9       | 23      |
| Eukarya  | Gastrotricha       | 12    | 100     | 112     |
| Bacteria | Cyanobacteria      | 11    | 1       | 12      |
| Eukarya  | Hemichordata       | 11    | 10      | 21      |

|          |                             |        |         |         |
|----------|-----------------------------|--------|---------|---------|
| Eukarya  | Acoelomorpha                | 10     | 50      | 60      |
| Eukarya  | Cryptophyta                 | 8      | ND      | 8       |
| Eukarya  | Zygomycota                  | 8      | ND      | 8       |
| Archaea  | Euryarchaeota               | 7      | ND      | 7       |
| Eukarya  | Kinorhyncha                 | 7      | 100     | 107     |
| Eukarya  | Metamonada                  | 6      | ND      | 6       |
| Eukarya  | Gnathostomulida             | 5      | 100     | 105     |
| Bacteria | Thermotogae                 | 4      | ND      | 4       |
| Bacteria | Verrucomicrobia             | 4      | ND      | 4       |
| Eukarya  | Glaucophyta                 | 4      | ND      | 4       |
| Bacteria | Acidobacteria               | 3      | ND      | 3       |
| Archaea  | Crenarchaeota               | 2      | ND      | 2       |
| Bacteria | Aquificae                   | 2      | ND      | 2       |
| Bacteria | Nitrospirae                 | 2      | ND      | 2       |
| Eukarya  | Phoronida                   | 2      | ND      | 2       |
| Eukarya  | Priapulida                  | 2      | 20      | 22      |
| Bacteria | Deferribacteres             | 1      | ND      | 1       |
| Bacteria | Deinococci                  | 1      | ND      | 1       |
| Eukarya  | Mesostigmatophyceae (Class) | 1      | ND      | 1       |
| Eukarya  | Loricifera                  | 1      | 10      | 11      |
| Eukarya  | Nematomorpha                | 1      | 100     | 101     |
| Eukarya  | Orthonecta                  | 1      | 3       | 4       |
| Eukarya  | Placozoa                    | 1      | ND      | 1       |
| Archaea  | Thaumarchaeota              | ND     | ND      | ND      |
| Eukarya  | Apicomplexa                 | ND     | ND      | ND      |
| Eukarya  | Percolozoa                  | ND     | ND      | ND      |
| Eukarya  | Amoebozoa                   | ND     | ND      | ND      |
| Eukarya  | Heliozoa                    | ND     | ND      | ND      |
| Eukarya  | Blastocladiomycota          | ND     | ND      | ND      |
| Eukarya  | Chytridiomycota             | ND     | ND      | ND      |
| Eukarya  | Glomeromycota               | ND     | ND      | ND      |
| Eukarya  | Microsporidia               | ND     | ND      | ND      |
| Eukarya  | Oomycota                    | ND     | ND      | ND      |
| Eukarya  | Opalozoa                    | ND     | ND      | ND      |
| Eukarya  | Acanthocephala              | ND     | ND      | ND      |
| Eukarya  | Cycliophora                 | ND     | ND      | ND      |
|          | Total                       | 33,629 | 121,913 | 155,542 |

ND=No Data

Table S5. 日本近海固有種数 (NES) と出現種数 (NDS) に対する固有種数の割合 (PES) .

| 分類群               |                |                | NES | NDS <sup>1</sup> | PES (%) <sup>2</sup> |
|-------------------|----------------|----------------|-----|------------------|----------------------|
| 門                 | 綱              | 目              |     |                  |                      |
| Granuloreticulosa | Foraminifera   |                | 383 | 2,321            | 17                   |
| Chordata          | Actinopterygii |                | 358 | 3,770            | 9                    |
| Mollusca          | Gastropoda     |                | 286 | 7,013            | 4                    |
| Arthropoda        | Malacostraca   | Mysida         | 117 | 226              | 52                   |
| Cnidaria          | Anthozoa       | Gorgonacea     | 115 | 241              | 48                   |
| Arthropoda        | Pycnogonida    |                | 60  | 153              | 39                   |
| Cnidaria          | Hydrozoa       | Athecata       | 53  | 130              | 41                   |
| Cnidaria          | Anthozoa       | Alcyonacea     | 50  | 223              | 22                   |
| Arthropoda        | Malacostraca   | Euphausiacea   | 49  | 86               | 57                   |
| Cnidaria          | Hydrozoa       | Thecata        | 46  | 286              | 16                   |
| Mollusca          | Bivalvia       |                | 46  | 1,252            | 4                    |
| Dicyemida         |                |                | 40  | 120              | 33                   |
| Nematoda          |                |                | 35  | 70               | 50                   |
| Entoprocta        |                |                | 33  | 41               | 80                   |
| Arthropoda        | Malacostraca   | Decapoda       | 28  | 2,501            | 1                    |
| Cnidaria          | Anthozoa       | Actiniaria     | 26  | 174              | 15                   |
| Cnidaria          | Anthozoa       | Pennatulacea   | 24  | 71               | 34                   |
| Arthropoda        | Maxillopoda    | Calanoida      | 22  | 743              | 3                    |
| Ctenophora        |                |                | 15  | 41               | 37                   |
| Cnidaria          | Anthozoa       | Scleractinia   | 10  | 530              | 2                    |
| Cnidaria          | Anthozoa       | Stolonifera    | 8   | 18               | 44                   |
| Myxozoa           | Myxosporea     | Bivalvulida    | 6   | 47               | 13                   |
| Arthropoda        | Maxillopoda    | Monstrilloida  | 5   | 12               | 42                   |
| Chaetognatha      |                |                | 5   | 36               | 14                   |
| Cnidaria          | Anthozoa       | Telestacea     | 5   | 8                | 63                   |
| Chordata          | Chondrichthyes |                | 5   | 11               | 45                   |
| Cnidaria          | Hydrozoa       | Siphonophora   | 4   | 54               | 7                    |
| Cnidaria          | Scyphozoa      |                | 4   | 37               | 11                   |
| Kinorhyncha       |                |                | 4   | 7                | 57                   |
| Arthropoda        | Maxillopoda    | Laurida        | 3   | 10               | 30                   |
| Arthropoda        | Maxillopoda    | Tantulocarida  | 3   | 4                | 75                   |
| Cnidaria          | Cubozoa        | Cubomedusae    | 3   | 4                | 75                   |
| Gastrotricha      |                |                | 3   | 12               | 25                   |
| Annelida          | Polychaeta     | Myzostomida    | 2   | 30               | 7                    |
| Annelida          | Polychaeta     | Spionida       | 2   | 89               | 2                    |
| Arthropoda        | Maxillopoda    | Platycopioidea | 2   | 2                | 100                  |
| Cnidaria          | Hydrozoa       | Limnomedusae   | 2   | 8                | 25                   |
| Mollusca          | Scaphopoda     |                | 2   | 47               | 4                    |
| Annelida          | Polychaeta     | Phyllodocida   | 1   | 466              | 0                    |
| Annelida          | Polychaeta     | Polygordiida   | 1   | 2                | 50                   |
| Arthropoda        | Maxillopoda    | Misophrioida   | 1   | 3                | 33                   |
| Arthropoda        | Maxillopoda    | Dendrogastrida | 1   | 3                | 33                   |
| Arthropoda        | Malacostraca   | Lophogastrida  | 1   | 14               | 7                    |
| Chordata          | Myxini         |                | 1   | 5                | 20                   |
| Loricifera        |                |                | 1   | 1                | 100                  |
| Nematomorpha      |                |                | 1   | 1                | 100                  |

|                 |                    |               |       |        |    |
|-----------------|--------------------|---------------|-------|--------|----|
| Arthropoda      | Maxillopoda        | Mormonilloida | 0     | 2      | 0  |
| Chordata        | Appendicularia     |               | 0     | 31     | 0  |
| Chordata        | Cephalaspidomorphi |               | 0     | 4      | 0  |
| Chordata        | Mammalia           |               | 0     | 46     | 0  |
| Chordata        | Thaliacea          |               | 0     | 40     | 0  |
| Cnidaria        | Anthozoa           | Helioporacea  | 0     | 1      | 0  |
| Cnidaria        | Hydrozoa           | Laingiomedusa | 0     | 1      | 0  |
| Cnidaria        | Hydrozoa           | Narcomedusae  | 0     | 9      | 0  |
| Cnidaria        | Hydrozoa           | Trachymedusae | 0     | 16     | 0  |
| Gnathostomulida |                    |               | 0     | 5      | 0  |
| Haptophyta      |                    |               | 0     | 304    | 0  |
| Priapulida      |                    |               | 0     | 2      | 0  |
| Others          |                    |               | ND    | 12,247 | ND |
| Total           |                    |               | 1,872 | 33,629 |    |

<sup>1</sup> 出現種数

<sup>2</sup> それぞれの分類群における出現種数に対する固有種数の割合

Table S6. 日本近海への外来種と移入メカニズムおよび原産域の推定

| 分類群      |                                | 推定される移入メカニズム             | 推定される原産域 | 引用文献                                                                                                                                                                                                                                                                                         |
|----------|--------------------------------|--------------------------|----------|----------------------------------------------------------------------------------------------------------------------------------------------------------------------------------------------------------------------------------------------------------------------------------------------|
| 門        | 種                              |                          |          |                                                                                                                                                                                                                                                                                              |
| Annelida | <i>Boccardia proboscidea</i>   | Ballast water, Fisheries | Unknown  |                                                                                                                                                                                                                                                                                              |
| Annelida | <i>Ficopomatus enigmaticus</i> | Hull fouling             | Unknown  | 西榮二郎・加藤哲哉 (2004) 環形動物多毛類の移入と移出の現状. 日本ベントス学会誌 59: 83-95., Link H, Nishi E, K. Tanaka, R. Bastida-zavala, E. K. Kupriyanova et al. (2009) <i>Hydroides dianthus</i> (Polychaeta: Serpulidae), an alien species introduced into Tokyo Bay, Japan. Mar Biodiv Rec: doi:10.1017/S1755267209000931 |
| Annelida | <i>Harmothoe imbricata</i>     | Unknown                  | Unknown  | Link H, Nishi E, K. Tanaka, R. Bastida-zavala, E. K. Kupriyanova et al. (2009) <i>Hydroides dianthus</i> (Polychaeta: Serpulidae), an alien species introduced into Tokyo Bay, Japan. Mar Biodiv Rec: doi:10.1017/S1755267209000931                                                          |
| Annelida | <i>Hydroides elegans</i>       | Hull fouling             | Unknown  | 西榮二郎・加藤哲哉 (2004) 環形動物多毛類の移入と移出の現状. 日本ベントス学会誌 59: 83-95., Link H, Nishi E, K. Tanaka, R. Bastida-zavala, E. K. Kupriyanova et al. (2009) <i>Hydroides dianthus</i> (Polychaeta: Serpulidae), an alien species introduced into Tokyo Bay, Japan. Mar Biodiv Rec: doi:10.1017/S1755267209000931 |
| Annelida | <i>Hydroides dianthus</i>      | Unknown                  | Unknown  | 西榮二郎・加藤哲哉 (2004) 環形動物多毛類の移入と移出の現状. 日本ベントス学会誌 59: 83-95., Link H, Nishi E, K. Tanaka, R. Bastida-zavala, E. K. Kupriyanova et al. (2009) <i>Hydroides dianthus</i> (Polychaeta: Serpulidae), an alien species introduced into Tokyo Bay, Japan. Mar Biodiv Rec: doi:10.1017/S1755267209000931 |
| Annelida | <i>Neanthes succinea</i>       | Unknown                  | Unknown  | Link H, Nishi E, K. Tanaka, R. Bastida-zavala, E. K. Kupriyanova et al. (2009) <i>Hydroides dianthus</i> (Polychaeta: Serpulidae), an alien species introduced into Tokyo Bay, Japan. Mar Biodiv Rec: doi:10.1017/S1755267209000931                                                          |
| Annelida | <i>Perinereis aibuhitensis</i> | Unknown                  | Unknown  | Link H, Nishi E, K. Tanaka, R. Bastida-zavala, E. K. Kupriyanova et                                                                                                                                                                                                                          |

|            |                                    |                             |                     |                                                                                                                                                                                                                                     |
|------------|------------------------------------|-----------------------------|---------------------|-------------------------------------------------------------------------------------------------------------------------------------------------------------------------------------------------------------------------------------|
|            |                                    |                             |                     | al. (2009) <i>Hydroides dianthus</i> (Polychaeta: Serpulidae), an alien species introduced into Tokyo Bay, Japan. Mar Biodiv Rec: doi:10.1017/S1755267209000931                                                                     |
| Annelida   | Phyllodocida sp.                   | Unknown                     | Unknown             | Link H, Nishi E, K. Tanaka, R. Bastida-zavala, E. K. Kupriyanova et al. (2009) <i>Hydroides dianthus</i> (Polychaeta: Serpulidae), an alien species introduced into Tokyo Bay, Japan. Mar Biodiv Rec: doi:10.1017/S1755267209000931 |
| Annelida   | <i>Polydora cornuta</i>            | Ballast water, Fisheries    | Unknown             |                                                                                                                                                                                                                                     |
| Annelida   | <i>Polydora</i> sp.                | Ballast water, Fisheries    | Unknown             |                                                                                                                                                                                                                                     |
| Arthropoda | <i>Balanus glandula</i>            | Hull fouling                | North-east Pacific  | 岩崎敬二・木村妙子・木下今日子・山口寿之・西川輝昭ほか (2004) 日本における海産生物の人為的移入と分散：日本ベントス学会自然保全委員会によるアンケート調査の結果から.日本ベントス学会誌 59: 22-44., 大谷道夫 (2004) 日本の海洋移入生物とその移入過程について.日本ベントス学会誌 59: 45-57.                                                                   |
| Arthropoda | <i>Balanus improvisus</i>          | Hull fouling                | North-east Atlantic | 岩崎敬二・木村妙子・木下今日子・山口寿之・西川輝昭ほか (2004) 日本における海産生物の人為的移入と分散：日本ベントス学会自然保全委員会によるアンケート調査の結果から.日本ベントス学会誌 59: 22-44., 大谷道夫 (2004) 日本の海洋移入生物とその移入過程について.日本ベントス学会誌 59: 45-57.                                                                   |
| Arthropoda | <i>Balanus eburneus</i>            | Hull fouling                | West Atlantic       | 岩崎敬二・木村妙子・木下今日子・山口寿之・西川輝昭ほか (2004) 日本における海産生物の人為的移入と分散：日本ベントス学会自然保全委員会によるアンケート調査の結果から.日本ベントス学会誌 59: 22-44., 大谷道夫 (2004) 日本の海洋移入生物とその移入過程について.日本ベントス学会誌 59: 45-57.                                                                   |
| Arthropoda | <i>Balanus amphitrite</i>          | Ballast water, Hull fouling | Unknown             | 岩崎敬二・木村妙子・木下今日子・山口寿之・西川輝昭ほか (2004) 日本における海産生物の人為的移入と分散：日本ベントス学会自然保全委員会によるアンケート調査の結果から.日本ベントス学会誌 59: 22-44., 大谷道夫 (2004) 日本の海洋移入生物とその移入過程について.日本ベントス学会誌 59: 45-57.                                                                   |
| Arthropoda | <i>Balanus variegatus cirratus</i> | Unknown                     | Unknown             | 岩崎敬二・木村妙子・木下今日子・山口寿之・西川輝昭ほか (2004) 日本における海産生物の人為的移入と分散：日本ベントス学会自然保全委員会によるアンケート調査の結果から.日本ベントス学会誌 59: 22-44., 大谷道夫 (2004) 日本の海洋移入生物とその移入過程について.日本ベントス学会誌 59: 45-57.                                                                   |
| Arthropoda | <i>Balanus venustus</i>            | Unknown                     | Unknown             | 岩崎敬二・木村妙子・木下今日子・山口寿之・西川輝昭ほか (2004) 日本における海産生物の人為的移入と分散：日本ベントス学会自然保全委員会によるアンケート調査の結果から.日本                                                                                                                                            |

|                  |                                   |                     |                                      |                                                                                                                                                                      |
|------------------|-----------------------------------|---------------------|--------------------------------------|----------------------------------------------------------------------------------------------------------------------------------------------------------------------|
| Arthropoda       | <i>Balanus venustus</i>           | Unknown             | Unknown                              | 岩崎敬二・木村妙子・木下今日子・山口寿之・西川輝昭ほか<br>(2004) 日本における海産生物の人為的移入と分散：日本ベントス学会自然保全委員会によるアンケート調査の結果から.日本ベントス学会誌 59: 22-44., 大谷道夫 (2004) 日本の海洋移入生物とその移入過程について.日本ベントス学会誌 59: 45-57. |
| Arthropoda       | <i>Callinectes sapidus</i>        | Hull fouling        | Atlantic, Caribbean Sea              | 岩崎敬二・木村妙子・木下今日子・山口寿之・西川輝昭ほか<br>(2004) 日本における海産生物の人為的移入と分散：日本ベントス学会自然保全委員会によるアンケート調査の結果から.日本ベントス学会誌 59: 22-44., 大谷道夫 (2004) 日本の海洋移入生物とその移入過程について.日本ベントス学会誌 59: 45-57. |
| Arthropoda       | <i>Carcinus aestuarii</i>         | Hull fouling        | Mediterranean, Black Sea             | 岩崎敬二・木村妙子・木下今日子・山口寿之・西川輝昭ほか<br>(2004) 日本における海産生物の人為的移入と分散：日本ベントス学会自然保全委員会によるアンケート調査の結果から.日本ベントス学会誌 59: 22-44., 大谷道夫 (2004) 日本の海洋移入生物とその移入過程について.日本ベントス学会誌 59: 45-57. |
| Arthropoda       | <i>Pyromaia tuberculata</i>       | Hull fouling        | East Pacific                         | 岩崎敬二・木村妙子・木下今日子・山口寿之・西川輝昭ほか<br>(2004) 日本における海産生物の人為的移入と分散：日本ベントス学会自然保全委員会によるアンケート調査の結果から.日本ベントス学会誌 59: 22-44., 大谷道夫 (2004) 日本の海洋移入生物とその移入過程について.日本ベントス学会誌 59: 45-57. |
| Arthropoda       | Siphonostomatoida sp.             | Unknown             | Unknown                              | 岩崎敬二・木村妙子・木下今日子・山口寿之・西川輝昭ほか<br>(2004) 日本における海産生物の人為的移入と分散：日本ベントス学会自然保全委員会によるアンケート調査の結果から.日本ベントス学会誌 59: 22-44., 大谷道夫 (2004) 日本の海洋移入生物とその移入過程について.日本ベントス学会誌 59: 45-57. |
| Chlorophyta      | <i>Caulerpa taxifolia</i>         | Accidental release? | Indian Ocean, Caribbean Sea, Pacific | 岩崎敬二・木村妙子・木下今日子・山口寿之・西川輝昭ほか<br>(2004) 日本における海産生物の人為的移入と分散：日本ベントス学会自然保全委員会によるアンケート調査の結果から.日本ベントス学会誌 59: 22-44., 大谷道夫 (2004) 日本の海洋移入生物とその移入過程について.日本ベントス学会誌 59: 45-57. |
| Chordata         | <i>Lateolabrax</i> sp.            | Fisheries           | China, Korea                         |                                                                                                                                                                      |
| Chordata         | <i>Molgula manhattensis</i>       | Hull fouling        | Unknown                              |                                                                                                                                                                      |
| Chordata         | <i>Polyandrocarpa zorritensis</i> | Hull fouling        | Atlantic                             |                                                                                                                                                                      |
| Cnidaria         | <i>Nemopilema nomurai</i>         | Unknown             | Unknown                              |                                                                                                                                                                      |
| Heterokontophyta | <i>Cutleria multifida</i>         | Hull fouling        | Indian Ocean                         | 岩崎敬二・木村妙子・木下今日子・山口寿之・西川輝昭ほか<br>(2004) 日本における海産生物の人為的移入と分散：日本ベ                                                                                                        |

|          |                                            |                             |                               |                                                                                                                                                                      |
|----------|--------------------------------------------|-----------------------------|-------------------------------|----------------------------------------------------------------------------------------------------------------------------------------------------------------------|
| Mollusca | <i>Mercenaria mercenaria</i>               | Unknown                     | West Atlantic                 | 岩崎敬二・木村妙子・木下今日子・山口寿之・西川輝昭ほか<br>(2004) 日本における海産生物の人為的移入と分散：日本ベントス学会自然保全委員会によるアンケート調査の結果から.日本ベントス学会誌 59: 22-44., 大谷道夫 (2004) 日本の海洋移入生物とその移入過程について.日本ベントス学会誌 59: 45-57. |
| Mollusca | <i>Meretrix petechialis</i>                | Fisheries                   | China, Korea                  |                                                                                                                                                                      |
| Mollusca | <i>Mytilopsis sallei</i>                   | Hull fouling, Cargo fouling | Caribbean Sea                 | 岩崎敬二・木村妙子・木下今日子・山口寿之・西川輝昭ほか<br>(2004) 日本における海産生物の人為的移入と分散：日本ベントス学会自然保全委員会によるアンケート調査の結果から.日本ベントス学会誌 59: 22-44., 大谷道夫 (2004) 日本の海洋移入生物とその移入過程について.日本ベントス学会誌 59: 45-57. |
| Mollusca | <i>Mytilus galloprovincialis</i>           | Hull fouling                | Mediterranean, East Atlantic  | 岩崎敬二・木村妙子・木下今日子・山口寿之・西川輝昭ほか<br>(2004) 日本における海産生物の人為的移入と分散：日本ベントス学会自然保全委員会によるアンケート調査の結果から.日本ベントス学会誌 59: 22-44., 大谷道夫 (2004) 日本の海洋移入生物とその移入過程について.日本ベントス学会誌 59: 45-57. |
| Mollusca | <i>Perna viridis</i>                       | Hull fouling                | Indian Ocean, South-east Asia | 岩崎敬二・木村妙子・木下今日子・山口寿之・西川輝昭ほか<br>(2004) 日本における海産生物の人為的移入と分散：日本ベントス学会自然保全委員会によるアンケート調査の結果から.日本ベントス学会誌 59: 22-44., 大谷道夫 (2004) 日本の海洋移入生物とその移入過程について.日本ベントス学会誌 59: 45-57. |
| Mollusca | <i>Ptericola</i> sp. cf. <i>lithophaga</i> | Unknown                     | Unknown                       | 岩崎敬二・木村妙子・木下今日子・山口寿之・西川輝昭ほか<br>(2004) 日本における海産生物の人為的移入と分散：日本ベントス学会自然保全委員会によるアンケート調査の結果から.日本ベントス学会誌 59: 22-44., 大谷道夫 (2004) 日本の海洋移入生物とその移入過程について.日本ベントス学会誌 59: 45-57. |
| Mollusca | <i>Xenostrobus securis</i>                 | Hull fouling                | Oceania                       | 岩崎敬二・木村妙子・木下今日子・山口寿之・西川輝昭ほか<br>(2004) 日本における海産生物の人為的移入と分散：日本ベントス学会自然保全委員会によるアンケート調査の結果から.日本ベントス学会誌 59: 22-44., 大谷道夫 (2004) 日本の海洋移入生物とその移入過程について.日本ベントス学会誌 59: 45-57. |
| Mollusca | <i>Crepidula onyx</i>                      | Hull fouling                | East Pacific                  | 岩崎敬二・木村妙子・木下今日子・山口寿之・西川輝昭ほか<br>(2004) 日本における海産生物の人為的移入と分散：日本ベントス学会自然保全委員会によるアンケート調査の結果から.日本ベントス学会誌 59: 22-44., 大谷道夫 (2004) 日本の海洋移入生物とその移入過程について.日本ベントス学会誌 59: 45-57. |



|          |                                 |              |                       |                                                                                                                                                                      |
|----------|---------------------------------|--------------|-----------------------|----------------------------------------------------------------------------------------------------------------------------------------------------------------------|
| Mollusca | <i>Cuthona perca</i>            | Hull fouling | Brazil, Caribbean Sea | 岩崎敬二・木村妙子・木下今日子・山口寿之・西川輝昭ほか<br>(2004) 日本における海産生物の人為的移入と分散：日本ベントス学会自然保全委員会によるアンケート調査の結果から.日本ベントス学会誌 59: 22-44., 大谷道夫 (2004) 日本の海洋移入生物とその移入過程について.日本ベントス学会誌 59: 45-57. |
| Mollusca | <i>Nassarius sinarus</i>        | Fisheries    | China                 | 岩崎敬二・木村妙子・木下今日子・山口寿之・西川輝昭ほか<br>(2004) 日本における海産生物の人為的移入と分散：日本ベントス学会自然保全委員会によるアンケート調査の結果から.日本ベントス学会誌 59: 22-44., 大谷道夫 (2004) 日本の海洋移入生物とその移入過程について.日本ベントス学会誌 59: 45-57. |
| Mollusca | <i>Stenothyra</i> sp.           | Fisheries    | Unknown               | 岩崎敬二・木村妙子・木下今日子・山口寿之・西川輝昭ほか<br>(2004) 日本における海産生物の人為的移入と分散：日本ベントス学会自然保全委員会によるアンケート調査の結果から.日本ベントス学会誌 59: 22-44., 大谷道夫 (2004) 日本の海洋移入生物とその移入過程について.日本ベントス学会誌 59: 45-57. |
| Myxozoa  | <i>Henneguya lateolabracis</i>  | Fisheries    | Unknown               | 小川和夫 (2005) 魚類寄生虫病.日本水産学会誌 71: 650-653.                                                                                                                              |
| Myxozoa  | <i>Septemcapsula yasunagai?</i> | Fisheries    | Unknown               | 小川和夫 (2005) 魚類寄生虫病.日本水産学会誌 71: 650-653.                                                                                                                              |
