# Supplementary material for: Marine Biodiversity in Japanese Waters
Source: PLoS One. 2010 Aug 2;5(8):e11836. doi: 10.1371/journal.pone.0011836 (PMC2914005; doi:10.1371/journal.pone.0011836)
Supplement: Table S1 — Brief history of marine biological activities in Japan. (0.04 MB XLS) [file pone.0011836.s001.xls]

## Sheet: Sheet1
	Table S1. Brief history of marine biological activities in Japan.
	Year	Item	Reference
	1709	Ekiken Kaibara (Japan): Published as a Yamato Honzo (concerning Japanese fauna and flora)	http://www.ndl.go.jp/nature/varie/varie_2.html
	1741	Gensen Kanda (Japan): Published as a Nitto-Gyofu, the first marine animal monographs in Japan	http://www.ndl.go.jp/nature/varie/varie_2.html
	1833-1850	Wilhem De Haan (Nederland): Published as Fauna Japonica (Crustacea), 8 Volumes, from Rijksmuseum van Natuurlijke Historie
	1842-1850	Coenraad J. Temminck and Hermann Schlegel (Nederland): Published as Fauna Japonica (Pisces), 16 Volumes, from Rijksmuseum van Natuurlijke Historie
	1871	Establishment of a Museum in Yushima Seido as part of the observational facilities of the Ministry of Education Museum Division (Present NMNS1)
	1873-1876	Franz Hilgendorf (German): Professor of natural history in Tokyo Medical School. Faunal study of Marine organisms
	1875	Oceanographic investigation by the HMS Challenger around Japan
	1877-1879	Edward S. Morse (USA): Professor of the University of Tokyo. Establishment of the first Marine Laboratory in Enoshima Island, Kanagawa in 1877	National Museum of Nature and Science (2007) A book series from the National Museum of Nature and Science No. 6 Fauna Sagamiana. Hadano: Tokai University Press. 212 p. (Japanese).
	1879-1881	Ludwig. H. P. Döderlein (German): Professor of natural history in The University of Tokyo Faculty of Medicine. Faunal study of Sagami Bay	National Museum of Nature and Science (2007) A book series from the National Museum of Nature and Science No. 6 Fauna Sagamiana. Hadano: Tokai University Press. 212 p. (Japanese).
	1886	Establishment of Misaki Marine Biological Station, The University of Tokyo, in Misaki, Kanagawa
	1888	Establishment of the Fisheries Training School (Present TUMSAT2)
	1904-1905	Franz Doflein (German): Deep-sea biological investigation in Sagami Bay	National Museum of Nature and Science (2007) A book series from the National Museum of Nature and Science No. 6 Fauna Sagamiana. Hadano: Tokai University Press. 212 p. (Japanese).
	1922	Establishment of a Marine Biological Research Station of the Faculty of Science, Kyoto Imperial University (Present Seto Marine Biological Laboratory, Field Science Education and Research Center, Kyoto University)
	1922-1930	Fishery investigation in continental shelf around Japan by the Imperial Fisheries Institute
	1925	Establishment of a Biological Laboratory, Imperial Household. Twelve marine organism monographs in Sagami Bay
	1925	Start of investigations using Research Vessel Soyo-Maru by the Imperial Fisheries Institute
	1929	Start of investigations (mainly fisheries science) using human-occupied vehicle Nishimura-shiki Mame Sensui-tei ichi-go，maximum depth 200 m
	1929	The Fisheries Experimental Station of the Ministry of Agriculture and Forestry was established in Tokyo（Present NRIFS3)
	1932	Establishment of the Japanese Society of Fisheries Science
	1941	Establishment of the Oceanographic Society of Japan
	1951-1958	Start of investigations using human-occupied vehicle Kuroshio-go，maximum depth 200 m. "Marine Snow" termed during this human-occupied vehicle investigation
	1962	Establishment of the ORI4, The University of Tokyo
	1963	Research Vessel Tansei-maru was completed by ORI4, The University of Tokyo
	1967	Research Vessel Hakuho-maru was completed by ORI4, The University of Tokyo
	1971	Establishment of the Japan Marine Science and Technology Center (JAMSTEC5, present Japan Agency for Marine-Earth Science and Technology)
	1973-	The National Survey on the Natural Environment by the Ministry of the Environment
	1981	Human-occupied vehicle Shinkai 2000 was completed by JAMSTEC5
	1984	Discovery of deep-sea chemosynthesis-based community in Sagami Bay. This was the first discovery of chemosynthesis-based community around Japan
	1986-	Investigation of endangered species in Japan by the Ministry of the Environment
	1989	Human-occupied vehicle Shinkai 6500 was completed by JAMSTEC5
	1993	Conclusion of Convention on Biological Diversity
	2001	Establishment of Global Biodiversity Information Facility Japan
	2002	Japanese Biota Species Number Survey by Union of Japanese Societies for Systematic Biology
	2007	Establishment of the law "Basic Act on Ocean Policy"
	1, 2, 3, 4, 5 Each abbreviation is shown in Table 2.
