# Supplementary material for: Marine Biodiversity in Japanese Waters
Source: PLoS One. 2010 Aug 2;5(8):e11836. doi: 10.1371/journal.pone.0011836 (PMC2914005; doi:10.1371/journal.pone.0011836)
Supplement: Table S3 — List of species diversity including the number of described species (NDS), the number of endemic species (NES), the number of undescribed species (NUS), expected number of species (ENS), the number of introduced species (NIS), the number of taxonomic experts, the number of identification guides, and state of knowledge in each taxon in Japanese waters. (0.25 MB XLS) [file pone.0011836.s003.xls]

## Sheet: Sheet1
	Table S3. List of species diversity including the number of described species (NDS), the number of endemic species (NES), the number of undescribed species (NUS), expected number of species (ENS), the number of introduced species (NIS), the number of taxonomic experts, the number of identification guides,
	and state of knowledge in each taxon in Japanese waters.
	Domain/ Kingdom/ Supergroup	Phylum/Division	Class	Order/Superorder/Infraorder/Suborder/Family	NDS	State of knowledge	NES	NUS	ENS	NIS	Number of taxonomic experts (name: affiliation1)	Number of identification guides	References
	Archaea				9		ND	ND	9	0	10 (Yoichi Kamagata: AIST, Ken Takai: JAMSTEC et al.)	>10	http://www.jcm.riken.jp/, http://www.nbrc.nite.go.jp/e/index.html, http://ijs.sgmjournals.org, http://www.bacterio.cict.fr/
		Crenarchaeota			2	3	ND	ND	2	0
		Euryarchaeota			7	3	ND	ND	7	0
		Thaumarchaeota			ND	1	ND	ND	ND	0
	Bacteria				843		ND	1	844	0	15 (Shigeaki Harayama: NITE, Yuichi Nogi: JAMSTEC, et al.)	>10	http://www.jcm.riken.jp/, http://www.nbrc.nite.go.jp/e/index.html, http:// ijs. sgmjournals.org/, http://www.bacterio. cict.fr/, http:// www.ncbi.nlm.nih.gov/ Taxonomy/Browser/wwwtax.cgi?id=2, http://www.nbrp.jp/report/reportProject.jsp
		Acidobacteria			3		ND	ND	3	0
			Acidobacteria		1		ND	ND	1	0
				Acidobacteriales	1	3	ND	ND	1	0
			Holophagae		2		ND	ND	2	0
				Acanthopleuribacteraceae	1	3	ND	ND	1	0
				Holophagales	1	3	ND	ND	1	0
		Actinobacteria			123		ND	ND	123	0
			Actinobacteria		123		ND	ND	123	0
				Acidimicrobiale	1	3	ND	ND	1	0
				Actinomycetales	121	5	ND	ND	121	0
				Bifidobacteriales	1	3	ND	ND	1	0
		Aquificae			2		ND	ND	2	0
			Aquificae		2		ND	ND	2	0
				Aquificales	2	3	ND	ND	2	0
		Bacteroides			125		ND	ND	125	0
			Bacteroidia		2		ND	ND	2	0
				Bacteroidales	2	3	ND	ND	2	0
			Flavobacteria		83		ND	ND	83	0
				Flavobacteriales	83	4	ND	ND	83	0
			Sphingobacteria		40		ND	ND	40	0
				Sphingobacteriales	40	4	ND	ND	40	0
		Cyanobacteria			11	5	ND	1	12	0
		Deferribacteres			1		ND	ND	1	0
			Deferribacteres		1		ND	ND	1	0
				Deferribacterales	1	3	ND	ND	1	0
		Deinococci			1		ND	ND	1	0
			Deinococci		1		ND	ND	1	0
				Deinococcales	1	3	ND	ND	1	0
		Firmicutes			172		ND	ND	172	0
			Bacilli		172		ND	ND	172	0
				Bacillales	159	5	ND	ND	159	0
				Lactobacillales	13	4	ND	ND	13	0
		Nitrospirae			2		ND	ND	2	0
			Nitrospira		2		ND	ND	2	0
				Nitrospirales	2	3	ND	ND	2	0
		Proteobacteria			395		ND	ND	395	0
			Alphaproteobacteria		78		ND	ND	78	0
				Caulobacterales	4	3	ND	ND	4	0
				Rhizobiales	18	4	ND	ND	18	0
				Rhodobacterales	41	4	ND	ND	41	0
				Sphingomonadales	15	4	ND	ND	15	0
			Betaproteobacteria		4		ND	ND	4	0
				Burkholderiales	2	3	ND	ND	2	0
				Neisseriales	2	3	ND	ND	2	0
			Deltaproteobacteria		7		ND	ND	7	0
				Desulfobacterales	2	3	ND	ND	2	0
				Desulfovibrionales	2	3	ND	ND	2	0
				Desulfuromonadales	2	3	ND	ND	2	0
				Myxococcales	1	3	ND	ND	1	0
			Epsilonproteobacteria		10		ND	ND	10	0
				Campylobacterales	4	3	ND	ND	4	0
				Nautiliales	2	3	ND	ND	2	0
				incertae sedis	4	3	ND	ND	4	0
			Gammaproteobacteria		296		ND	ND	296	0
				Aeromonadales	3	3	ND	ND	3	0
				Alteromonadales	91	4	ND	ND	91	0
				Chromatiales	2	3	ND	ND	2	0
				Enterobacteriales	8	3	ND	ND	8	0
				Legionellales	3	3	ND	ND	3	0
				Oceanospirillales	53	4	ND	ND	53	0
				Pseudomonadales	58	4	ND	ND	58	0
				Thiotrichales	6	3	ND	ND	6	0
				Vibrionales	63	4	ND	ND	63	0
				Xanthomonadales	4	3	ND	ND	4	0
				incertae sedis	5	3	ND	ND	5	0
		Thermotogae			4		ND	ND	4	0
			Thermotogae		4		ND	ND	4	0
				Thermotogales	4	3	ND	ND	4	0
		Verrucomicrobia			4		ND	ND	4	0
			Verrucomicrobiae		4		ND	ND	4	0
				Verrucomicrobiales	4	3	ND	ND	4	0
	Eukarya/Chromista				1247		ND	ND	1247	1	2 (Hidekazu Suzuki: TUMSAT, Jiro Tanaka: TUMSAT)
		Heterokontophyta/Ochrophyta			1207		ND	ND	1207	1
			Bacillariophyceae		862		ND	ND	862	ND		3	Chihara, M, and Murano, M (1997) An illustrated guide to marine plankton in Japan. Tokyo: Tokai University Press. 1574 p. (Japanese), Lindsay D, Miyake H (2009) A checklist of midwater cnidarians and ctenophores from Japanese waters: species sampled during submersible surveys from 1993~2008 with notes on their taxonomy. Kaiyo monthly 53: 417-438 (Japanese).
				Centrales	425	5	ND	ND	425	ND
				Pennales	437	5	ND	ND	437	ND
			Chrysomerophyceae		2		ND	ND	2	ND		>3	Chihara, M, and Murano, M (1997) An illustrated guide to marine plankton in Japan. Tokyo: Tokai University Press. 1574 p. (Japanese), Lindsay D, Miyake H (2009) A checklist of midwater cnidarians and ctenophores from Japanese waters: species sampled during submersible surveys from 1993~2008 with notes on their taxonomy. Kaiyo monthly 53: 417-438 (Japanese).
				Chrysomeridales	2	3	ND	ND	2	ND
			Chrysophyceae		5		ND	ND	5	0
				Chromulinales	5	3	ND	ND	5	0
			Dictyochophyceae		9		ND	ND	9	ND
				Ciliophryales	1	3	ND	ND	1	ND
				Dictyochales	5	3	ND	ND	5	ND
				Pedinellales	2	3	ND	ND	2	ND
				incertae sedis	1	3	ND	ND	1	ND
			Eustigmatophyceae		5		ND	ND	5	ND
				Eustigmatales	5	3	ND	ND	5	ND
			Pelagophyceae		3		ND	ND	3	ND
				Sarinochrysidales	3	3	ND	ND	3	ND
			Phaeophyceae/Phaeophyta		304		ND	ND	304	ND
				Chordariales	54	4	ND	ND	54	ND
				Cutleriales	3	3	ND	ND	3	ND
				Desmarestiales	3	3	ND	ND	3	ND
				Dictyosiphonales	25	4	ND	ND	25	ND
				Dictyotales	39	4	ND	ND	39	ND
				Ectocarpales	24	4	ND	ND	24	ND
				Fucales	69	4	ND	ND	69	ND
				Laminariales	39	4	ND	ND	39	ND
				Ralfsiales	17	4	ND	ND	17	ND
				Scytosiphonales	17	4	ND	ND	17	ND
				Sphacelariales	10	4	ND	ND	10	ND
				Sporochnales	3	3	ND	ND	3	ND
				Syringodermatales	1	3	ND	ND	1	ND
			Pinguiophyceae		1		ND	ND	1	ND
				Pinguiochrysidales	1	3	ND	ND	1	ND
			Raphidophyceae		15		ND	ND	15	ND
				Raphidomonadales	15	4	ND	ND	15	ND
			Xanthophyceae		1		ND	ND	1	1
				Vaucheriales	1	3	ND	ND	1	1
		Labyrinthulomycota			40	4	ND	ND	40	0	2	ND	Sugita J (2005) Diversity and evolution of fungi, bacteria and viruses. Tokyo: Shokabo. 492 p. (Japanese).
		Oomycota			ND	1	ND	ND	ND	ND	1 (Shigeki Inaba: NITE)		http://research2.kahaku.go.jp/ujssb/search
		Opalozoa			ND	1	ND	ND	ND	ND	ND
	Eukarya/Plantae				1195		ND	ND	1195	1	2 (Jiro Tanaka: TUMSAT, Hidekazu Suzuki: TUMSAT)	>3	http://research2.kahaku.go.jp/ujssb/search
		Angiospermae/Magnoliopsida			44		ND	ND	44	ND
			Liliopsida		44		ND	ND	44	ND
				Najadales	44	4	ND	ND	44	ND
		Chlorophyta			248		ND	ND	248	1
			Chlorophyceae		2		ND	ND	2	0
				Chlamydomonadales	1	3	ND	ND	1	0
				Chlorococcales	1	3	ND	ND	1	0
			Ulvophyceae		246		ND	ND	246	1
				Caulerpales	86	4	ND	ND	86	1
				Cladophorales	86	4	ND	ND	86	0
				Dasycladales	16	4	ND	ND	16	0
				Ulotrichales	27	4	ND	ND	27	0
				Ulvales	31	4	ND	ND	31	0
		Glaucophyta			4		ND	ND	4	0
			Glaucophyceae		4		ND	ND	4	0
				Cyanophorales	3	3	ND	ND	3	0
				Glaucocystales	1	3	ND	ND	1	0
		Rhodophyta			898		ND	ND	898	0
			Bangiophyceae		42		ND	ND	42	0
				Bangiales	30	4	ND	ND	30	0
				Compsopogonales	5	3	ND	ND	5	0
				Erythropeltidales	7	3	ND	ND	7	0
			Cyanidiophyceae		2		ND	ND	2	0
				Cyanidiales	2	3	ND	ND	2	0
			Florideophyceae		841		ND	ND	841	0
				Acrochaetiales	37	4	ND	ND	37	0
				Ahnfeltiales	1	3	ND	ND	1	0
				Batrachospermales	27	4	ND	ND	27	0
				Bonnemaisoniales	4	3	ND	ND	4	0
				Ceramiales	320	5	ND	ND	320	0
				Corallinales	106	5	ND	ND	106	0
				Gelidiales	27	4	ND	ND	27	0
				Gigartinales	127	5	ND	ND	127	0
				Gracilariales	22	4	ND	ND	22	0
				Halymeniales	38	4	ND	ND	38	0
				Hildenbrandiales	3	3	ND	ND	3	0
				Nemaliales	56	4	ND	ND	56	0
				Nemastomatales	11	4	ND	ND	11	0
				Palmales	11	4	ND	ND	11	0
				Plocamiales	5	3	ND	ND	5	0
				Rhodymeniales	43	4	ND	ND	43	0
				Thoreales	3	3	ND	ND	3	0
			Rhodellophyceae		13		ND	ND	13	0
				Goniotrichales	8	3	ND	ND	8	0
				Porphyridiales	5	3	ND	ND	5	0
		incertae sedis			1		ND	ND	1	0
			Mesostigmatophyceae		1		ND	ND	1	0
				Mesostigmatales	1	3	ND	ND	1	0
	Eukarya/Protista				4201		383	594	4795	0
	Eukarya/Protista/Alveolata				1000		ND	ND	1000	0
		Apicomplexa			ND		ND	ND	ND	0	ND	ND
			Sporozoea		ND	1	ND	ND	ND	0
		Ciliophora			530		ND	ND	530	0	4 (Miwa Nakamachi: TNFRI, Takashi Ota: ISU, et al.)	1	http://protist.i.hosei.ac.jp/protist_menu.html, http://www.jodc.go.jp/data/biology_j.html
			Heterotrichea		16		ND	ND	16	0
				Heterotrichida	10	4	ND	ND	10	0
				Licnophorida	1	3	ND	ND	1	0
				Plagiotomida	1	3	ND	ND	1	0
				Peritromida	4	3	ND	ND	4	0
			Karyorelictea		6		ND	ND	6	0
				Loxodida	2	3	ND	ND	2	0
				Protostomatida	3	3	ND	ND	3	0
				Protoheterotrichida	1	3	ND	ND	1	0
			Litostomatea		14		ND	ND	14	0
				Haptorida	8	3	ND	ND	8	0
				Pleurostomatida	6	3	ND	ND	6	0
			Nassophorea		15		ND	ND	15	0
				Nassulida	7	3	ND	ND	7	0
				Synhymeniida	8	3	ND	ND	8	0
			Oligohymenophora		34		ND	ND	34	0
				Hymenostomatida	3	3	ND	ND	3	0
				Mobilida	2	3	ND	ND	2	0
				Sessilida	7	3	ND	ND	7	0
				Peniculida	6	3	ND	ND	6	0
				Scuticocilatida	15	4	ND	ND	15	0
				Plagiopylida	1	3	ND	ND	1	0
			Phyllopharyngea		11		ND	ND	11	0
				Cyrtophorida	11	4	ND	ND	11	0
			Prostomatea		6		ND	ND	6	0
				Prorodontida	6	3	ND	ND	6	0
			Spirotrichea		428		ND	ND	428	0
				Choreotrichida	349	5	ND	ND	349	0
				Stichotrichida	6	3	ND	ND	6	0
				Oligotrichida	63	4	ND	ND	63	0
				Euplotida	9	3	ND	ND	9	0
				Armophorida	1	3	ND	ND	1	0
		Dinomastigota/Dinoflagellata/Dinophyta			470		ND	ND	470	0	4 (Jiro Tanaka: TUMSAT, Hidekazu Suzuki: TUMSAT, et al.)	>1	Chihara, M, and Murano, M (1997) An illustrated guide to marine plankton in Japan. Tokyo: Tokai University Press. 1574 p. (Japanese).
			Dinophyceae		461		ND	ND	461	0
				Dinophysiales	57	4	ND	ND	57	0
				Gonyaulacales	124	5	ND	ND	124	0
				Gymnodiniales	86	4	ND	ND	86	0
				Kolkwitziellales	1	3	ND	ND	1	0
				Peridiniales	166	5	ND	ND	166	0
				Phytodiniales	2	3	ND	ND	2	0
				Prorocentrales	24	4	ND	ND	24	0
				Thoracosphaerales	1	3	ND	ND	1	0
			Noctilciphyceae		9		ND	ND	9	0
				Noctilcales	9	3	ND	ND	9	0
	Eukarya/Protista/Amoebobiota				ND		ND	ND	ND	ND	ND	ND
		Amoebozoa			ND	1	ND	ND	ND	ND
	Eukarya/Protista/Chromalveolata				312		0	ND	312	0
		Cryptophyta			8		ND	ND	8	0	1 (Mayumi Erata: Global Environmental Forum)	>1	Chihara, M, and Murano, M (1997) An illustrated guide to marine plankton in Japan. Tokyo: Tokai University Press. 1574 p. (Japanese).
			Cryptophyceae		8		ND	ND	8	0
				Cryptomonadales	8	3	ND	ND	8	0
		Haptophyta			304		0	ND	304	0	5 (Masanobu Kawachi: NIES, Takeshi Nakayama: University of Tsukuba, et al.)	10	Jordan RW, Cros L, Young JR (2004) A revised classification scheme for living haptophytes. Micropaleontol 50: 55-79.
			Pavlovophyceae		11		0	ND	11	0
				Pavlovales	11	4	0	ND	11	0
			Prymnesiophyceae		293		0	ND	293	0
				Coccolithales	26	4	0	ND	26	0
				Isochrysidales	20	4	0	ND	20	0
				Phaeocystidales	9	3	0	ND	9	0
				Prymnesiales	71	4	0	ND	71	0
				Syracosphaerales	99	4	0	ND	99	0
				Zygodiscales	67	4	0	ND	67	0
				incertae sedis	1	3	0	ND	1	0
	Eukarya/Protista/Excavata				20		ND	ND	20	0
		Euglenophyta			14		ND	ND	14	0	1 (Minoru Saito: YNU)	1	Chihara, M, and Murano, M (1997) An illustrated guide to marine plankton in Japan. Tokyo: Tokai University Press. 1574 p. (Japanese).
			Euglenophyceae		14		ND	ND	14	0
				Euglenales	8	3	ND	ND	8	0
				Eutreptiales	6	3	ND	ND	6	0
		Metamonada			6		ND	ND	6	0	2 (Naoji Yubuki: UBC, Kiyotaka Takishita: JAMSTEC)	0
				Carpediemonadida	3	3	ND	ND	3	0
				Diplomonadida	1	3	ND	ND	1	0
				Retortamonadida	1	3	ND	ND	1	0
				Trichomonadida	1	3	ND	ND	1	0
		Percolozoa			ND	1	ND	ND	ND	0	ND	ND
	Eukarya/Protista/Rhizaria				2869		383	594	3463	0
		Cercozoa			143		ND	4	147	0	1 (Kozo Takahashi: Kyushu University)	5	Takahashi K, Anderson OR (2000) Class Phaeodaria. In: Lee JJ, Leedale GF, Bradbury P, editors. An Illustrated Guide to the Protozoa (2nd edition). Organisms traditionally referred to as Protozoa, or newly discovered groups. Kansas: Society of Protozoologists, pp. 981-994.
				Phaeodaria	143	5	ND	4	147	0
		Granuloreticulosa			2321		383	490	2811	0	5 (Shiro Hasegawa: Kumamoto University, Yasumochi Matoba: SFL, et al.)	6	Nomura R (1987) List of recent benthic foraminifera reported from the seas around the Japanese Islands, 1982-1997. Mem Fac Edu, Shimane Univ, Nat Sci 31: 1-25.
			Foraminifera		2321		383	490	2811	0
				Allogromiina	2	3	0	1	3	0
				Carterinina	1	5	0	0	1	0
				Globigerinina	47	5	0	4	51	0
				Involutinina	4	5	1	0	4	0
				Lagenina	404	5	72	66	470	0
				Miliolina	340	5	33	77	417	0
				Robertinida	19	4	4	6	25	0
				Rotaliina	989	5	204	189	1178	0
				Spirillinina	15	5	0	3	18	0
				Textulariina	500	5	69	144	644	0
		Radiozoa			405		ND	100	505	0		35
			Acantharea		66		ND	ND	66	0	0	10	Bernstein RE, Kling SK, Boltovskoy D (1999) Acantharia. In: Boltovskoy E, editor. South Atlantic zooplankton. Leiden: Backhuys Publishers. pp. 75-147.
				Arthracanthida	51	4	ND	ND	51	0
				Chaunacanthida	3	3	ND	ND	3	0
				Holacanthida	4	3	ND	ND	4	0
				Symphyacanthida	8	3	ND	ND	8	0
			Polycystinea		338		ND	100	438	0	5 (Noritoshi Suzuki: Tohoku University, Atsushi Matsuoka: Niigata University et al.)	20	Itaki T (2009) Late glacial to Holocene Polycystine radiolarians from the Japan Sea, Special Volume. News Osaka Micropaleontol 14: 43-89.
				Collodaria	31	4	ND	20	51	0
				Entactinaria	25	4	ND	20	45	0
				Nassellaria	168	5	ND	20	188	0
				Spumellaria	114	5	ND	40	154	0
			incertae sedis		1		ND	0	1	0	0	1
				Taxopodia	1	5	ND	0	1	0
	Eukarya/Protista/incertae sedis				ND		ND	ND	ND	ND	ND	ND
		Heliozoa			ND	1	ND	ND	ND	ND
	Eukarya/Fungi/Opisthokonta				367		ND	ND	367	0	2 (Takahiko Nagahama: JAMSTEC, Akira Nakagiri: NITE)	3	Benson, D. A., Karsch-Mizrachi, I., Lipman, D. J., Ostell, J., & Wheeler, D. L. (2008). GenBank. Nucleic Acids Research, 36(Database issue), D25-30. doi: 10.1093/nar/gkm929., http://www.cbs.knaw.nl/databases/, http://www.nbrc.nite.go.jp/NBRC2/NBRCDispSearchServlet?lang=en
		Ascomycota			294		ND	ND	294	0
			Dothideomycetes		38		ND	ND	38	0
				Capnodiales	2	3	ND	ND	2	0
				Dothideales	2	3	ND	ND	2	0
				Pleosporales	31	4	ND	ND	31	0
				Tubeufiaceae	3	3	ND	ND	3	0
			Dothideomycetes et Chaetothyriomycetes		6		ND	ND	6	0
				Cucurbitariaceae	3	3	ND	ND	3	0
				Dothioraceae	3	3	ND	ND	3	0
			Eurotiomycetes		30		ND	ND	30	0
				Chaetothyriales	4	3	ND	ND	4	0
				Eurotiales	22	4	ND	ND	22	0
				Onygenales	4	3	ND	ND	4	0
			Lecanoromycetes		1		ND	ND	1	0
				Lecanorales	1	3	ND	ND	1	0
			Leotiomycetes		24		ND	ND	24	0
				Helotiales	18	4	ND	ND	18	0
				Myxotrichaceae	1	3	ND	ND	1	0
				Pseudeurotiaceae	5	3	ND	ND	5	0
			Orbiliomycetes		1		ND	ND	1	0
				Orbiliales	1	3	ND	ND	1	0
			Saccharomycetes		47		ND	ND	47	0
				Saccharomycetales	47	4	ND	ND	47	0
			Sordariomycetes		138		ND	ND	138	0
				Chaetosphaeriales	1	3	ND	ND	1	0
				Diaporthales	1	3	ND	ND	1	0
				Halosphaeriales	43	4	ND	ND	43	0
				Hypocreales	26	4	ND	ND	26	0
				Hypocreomycetidae	3	3	ND	ND	3	0
				Lulworthiales	9	3	ND	ND	9	0
				Melanosporales	2	3	ND	ND	2	0
				Microascales	19	4	ND	ND	19	0
				Phyllachorales	2	3	ND	ND	2	0
				Sordariales	12	4	ND	ND	12	0
				Xylariales	16	4	ND	ND	16	0
				Apiosporaceae	4	3	ND	ND	4	0
			incertae sedis		9		ND	ND	9	0
				“Dematiaceae”	3	3	ND	ND	3	0
				“Myxotrichaceae”	1	3	ND	ND	1	0
				“Hyphomycetes”	5	3	ND	ND	5	0
		Basidiomycota			65		ND	ND	65	0
			Agaricomycetes		6		ND	ND	6	0
				Agaricales	2	3	ND	ND	2	0
				Auriculariales	1	3	ND	ND	1	0
				Polyporales	2	3	ND	ND	2	0
				Russulales	1	3	ND	ND	1	0
			Agaricostilbomycetes		3		ND	ND	3	0
				Agaricostilbomycetes	3	3	ND	ND	3	0
			Cystobasidiomycetes		9		ND	ND	9	0
				Erythrobasidiales	9	3	ND	ND	9	0
			Exobasidiomycetes		3		ND	ND	3	0
				Exobasidiales	1	3	ND	ND	1	0
				Georgefischeriales	1	3	ND	ND	1	0
				Microstromatales	1	3	ND	ND	1	0
			Microbotryomycetes		16		ND	ND	16	0
				Leucosporidiales	1	3	ND	ND	1	0
				Sporidiobolales	14	4	ND	ND	14	0
				Microbotryomycetes	1	3	ND	ND	1	0
			Tremellomycetes		27		ND	ND	27	0
				Cystofilobasidiales	5	3	ND	ND	5	0
				Filobasidiales	9	3	ND	ND	9	0
				Tremellales	13	3	ND	ND	13	0
			Ustilaginomycetes		1		ND	ND	1	0
				Ustilaginales	1	3	ND	ND	1	0
		Blastocladiomycota			ND	1	ND	ND	ND	0
		Chytridiomycota			ND	1	ND	ND	ND	0
		Glomeromycota			ND	1	ND	ND	ND	0
		Microsporidia			ND	1	ND	ND	ND	0
		Zygomycota			8		ND	ND	8	0
			“Mucoromycotina”		8		ND	ND	8	0
				Mortierellales	2	3	ND	ND	2	0
				Mucorales	6	3	ND	ND	6	0
	Eukarya/Animalia/Opisthokonta				25767		1489	121318	147085	37
		Acanthocephala			ND	1	ND	ND	ND	ND	ND	ND
		Acoelomorpha			10		ND	50	60	0	1 (Ken-ichi Tajika: Nihon University)	1	http://research2.kahaku.go.jp/ujssb/search
			Acoela		10		ND	50	60	0
				Acoela	10	4	ND	50	60	0
		Annelida			1076		6	124	1200	10
			Hirudinea		10	4	ND	ND	10	0	1 (Yoshikazu Takashima)	ND
			Oligochaeta		20	4	ND	ND	20	0	ND	1	Takashima Y (1999) Taxonomy of marine Tubificidae of Japan. (1) Recent advances in marine oligochaetology. Aquabio 124: 394-398 (in Japanese with English abstract).
			Polychaeta		1046		6	124	1170	10	6 (Eijiro Nishi: YNU, Tetsuya Kato: Kyoto University, et al.)	4	Nishi E, Kato T, Takashima Y (2003) Polychaeta. In: Nishida M, Shikatani H, Shokita S, editors. Freshwater organisms in Ryukyu Archipelago. Tokyo: Tokai University Press. pp. 181-189 (Japanese).
				Amphinomida	21	4	ND	ND	21	0
				Capitellida	48	4	ND	ND	48	0
				Cossurida	3	4	ND	ND	3	0
				Ctenodrilidae	ND	1	ND	ND	ND	0
				Diurodrilida	1	3	ND	ND	1	0
				Eunicida	129	5	ND	5	134	0
				Flabelligerida	6	5	ND	1	7	0
				Myzostomida	30	4	2	ND	30	0
				Opheliida	12	4	ND	ND	12	0
				Orbiniida	23	4	ND	ND	23	0
				Oweniida	6	3	ND	ND	6	0
				Parergodrilida	ND	1	ND	ND	ND	0
				Phyllodocida	466	5	1	ND	466	4
				Poeobiida	1	3	ND	ND	1	0
				Polygordiida	2	3	1	ND	2	0
				Protodrilida	2	3	ND	ND	2	0
				Psammodrilida	ND	1	ND	ND	ND	0
				Qeustida	ND	1	ND	ND	ND	0
				Sabellida	130	4	ND	40	170	3
				Spintherida	3	3	ND	ND	3	0
				Spionida	89	4	2	42	131	3
				Sternaspida	1	3	ND	1	2	0
				Terebellidae	73	4	ND	35	108	0
				Yndolacida	ND	1	ND	ND	ND	0
		Arthropoda			6393		292	1677	8070	10
			Branchiopoda		7		ND	ND	7	0	1 (Takashi Onbé: Hiroshima University)	2	Egloff DA, Fofonoff PW, Onbé T (1997) Reproductive biology of marine Cladocerans. Adv Mar Biol. 31: 79-167.
				Podonidae	6	3	ND	ND	6	0
				Sididae	1	3	ND	ND	1	0
			Cephalocarida		1		ND	ND	1	0	ND	ND	http://research2.kahaku.go.jp/ujssb/search
				Brachypoda	1	2	ND	ND	1	0
			Insecta		7		ND	ND	7	0
				Hemiptera	4	2	ND	ND	4	0
				Diptera	3	2	ND	ND	3	0
			Malacostraca		4074		195	1539	5613	3
				Amphionidacea	1	2	ND	ND	1	0	ND	ND	http://research2.kahaku.go.jp/ujssb/search
				Amphipoda	544	4	ND	864	1408	0		>2
				Bathynellacea	15	4	ND	ND	15	0
				Cumacea	80	4	ND	ND	80	0			Kikuchi T (1997) Cumacea. In: Okutani T, Takeda M, Imafuku M, editors. The Encyclopedia of Animals in Japan. Tokyo: Heibonsha Limited, Publishers. p. 139. (Japanese).
				Decapoda	2501	5	28	ND	2501	3	5 (Komai Tomoyuki: NHMIC, Hironori Komatsu: NMNS, et al.)	8
				Euphausiacea	86	5	49	5	91	0	3 (Shozo Sawamoto: Tokai University, Nobunari Endo: Tohoku University, et al.)	5	Sawamoto S (1979) Geographical distribution of euphausiids in the western part of the subtropical North Pacific Ocean. The Kuroshio IV, Pro 4th CSK Symp. Tokyo. 651-664.
				Leptostraca	4	3	ND	ND	4	0	ND	>2	Kikuchi T (1997) Cumacea. In: Okutani T, Takeda M, Imafuku M, editors. The Encyclopedia of Animals in Japan. Tokyo: Heibonsha Limited, Publishers. p. 139. (Japanese).
				Lophogastrida	14	4	1	ND	14	0	2 (Kouki Fukuoka: SNF, Masaaki Murano)	1	Chihara, M, and Murano, M (1997) An illustrated guide to marine plankton in Japan. Tokyo: Tokai University Press. 1574 p. (Japanese).
				Mysida	226	5	117	ND	226	0		3
				Stomatopoda	56	4	ND	ND	56	0	ND	>2	http://research2.kahaku.go.jp/ujssb/search
				Tanaidacea	92	4	ND	ND	92	0	3 (Nobuhiro Saito: Suido-sha, Michitaka Shimomura: KMNH, et al.)	4	Larsen K, Shimomura M (2006) Tanaidacea (Crustacea: Peracarida) from Japan. I. Apseudomorpha from the East China Sea, Seto Inland Sea, and Nansei Islands. Zootaxa 1341: 29-48.
				Thermosbaenacea	1	3	ND	ND	1	0	1 (Michitaka Shimomura: KMNH)	ND	Shimomura M, Fujita Y (2009) First record of the thermosbaenacean genus Halosbaena from Asia: H. daitoensis sp. nov. (Peracarida: Thermosbaenacea: Halosbaenidae) from an anchihaline cave of Minamidaito-jima Is., in Okinawa, southern Japan. Zootaxa. 1990: 55-64.
				Isopoda	454	5	ND	670	1124	0	7 (Michitaka Shimomura: KMNH, Noboru Nunomura: TSM, et al.)	3
			Maxillopoda		2150		37	118	2268	7
				Arguloida	5	3	ND	ND	5	0	1 (Kazuya Nagasawa: Hiroshima University)	2	http://www.jodc.go.jp/data/biology.html
				Calanoida	743	5	22	ND	743	0	5 (Susumu Ohtsuka: Hiroshima University, Shuhei Nishida: University of Tokyo, et al.)
				Cyclopoida	78	4	ND	ND	78	0	4 (Shuhei Nishida: University of Tokyo, Hiroshi Ueda: Kochi University, et al.)	3
				Dendrogastrida	3	3	1	8	11	0	2 (Mark J. Grygier: LBM, Miéko Komatsu: University of Toyama)	2	Haramoto S, Komatsu M, Yamazaki Y (2007) Patterns of asexual reproduction in the fissiparous seastar Coscinasterias acutispina (Asteroidea: Echinodermata) in Japan. Zool Sci 24: 1075-1081.
				Facetotecta	10	4	ND	40	50	0	2 (Mark J. Grygier: LBM, Tomohiko Kikuchi: YNU)	1	Glenner H, Høeg JT, Grygier MJ, Fujita Y (2008) Induced metamorphosis in crustacean y-larvae: Towards a solution to a 100-year-old riddle. BMC Biology 6: 21.
				Halocyprida	11	4	ND	ND	11	0	1 (Akira Tsukagoshi: Shizuoka University)	>2	http://research2.kahaku.go.jp/ujssb/search
				Harpacticoida	140	5	ND	ND	140	0	3 (Nozomu Iwasaki: Kochi University, Shinji Shimode: University of Tokyo, et al.)	3	http://www.jodc.go.jp/data/biology.html
				Laurida	10	4	3	13	23	0	1 (Mark J. Grygier: LBM)	2	Grygier MJ (1996) A world list of coral reef-associated Ascothoracida (Crustacea), with remarks on Lauridae, Petrarcidae, and Dendrogastridae from Okinawa, Japan. Galaxea 13: 15-33.
				Lernaeodiscidae	2	3	ND	ND	2	0	ND	>1	http://research2.kahaku.go.jp/ujssb/search
				Misophrioida	3	3	1	ND	3	0	1 (Susumu Ohtsuka: Hiroshima University)	3	http://www.jodc.go.jp/data/biology.html
				Monstrilloida	12	4	5	ND	12	0	2 (Susumu Ohtsuka: Hiroshima University, Mark J. Grygier: LBM)
				Mormonilloida	2	3	0	ND	2	0	1 (Susumu Ohtsuka: Hiroshima University)
				Myodocopida	25	4	ND	ND	25	0	1 (Akira Tsukagoshi: Shizuoka University)	2	http://research2.kahaku.go.jp/ujssb/search
				Pedunculata	66	4	ND	28	94	0	1 (Toshiyuki Yamaguchi: Chiba University)	>2
				Peltogastriidae	4	3	ND	ND	4	0	ND	>1
				Platycopida	2	3	ND	ND	2	0	1 (Akira Tsukagoshi: Shizuoka University)
				Platycopioida	2	3	2	ND	2	0	1 (Susumu Ohtsuka: Hiroshima University)	3	http://www.jodc.go.jp/data/biology.html
				Podocopida	284	5	ND	ND	284	0	1 (Akira Tsukagoshi: Shizuoka University)	>1	http://research2.kahaku.go.jp/ujssb/search
				Poecilostomatoida	321	5	ND	ND	321	0	5 (Kazuya Nagasawa: Hiroshima University, Shuhei Nishida: University of Tokyo et al.)	3	http://www.jodc.go.jp/data/biology.html
				Sessilia	154	5	ND	29	183	6	1 (Toshiyuki Yamaguchi: Chiba University)	>2	http://research2.kahaku.go.jp/ujssb/search
				Siphonostomatoida	253	5	ND	ND	253	1	2 (Kazuya Nagasawa: Hiroshima University, Susumu Ohtsuka: Hiroshima University)	1	http://www.jodc.go.jp/data/biology.html
				Succulinidae	13	4	ND	ND	13	0	ND	>1	http://research2.kahaku.go.jp/ujssb/search
				Sylonidae	1	3	ND	ND	1	0
				Tantulocarida	4	3	3	ND	4	0	1 (Susumu Ohtsuka: Hiroshima University)	3	http://www.jodc.go.jp/data/biology.html
				Thompsoniidae	2	3	ND	ND	2	0	ND	>1	http://research2.kahaku.go.jp/ujssb/search
			Merostoma		1		ND	0	1	0
				Xiphosurida	1	5	ND	0	1	0
			Pycnogonida		153		60	20	173	0	1 (Ko-ichiro Nakamura)	3	Nakamura K, Child CA (1991) Pycnogonida from waters adjacent to Japan. Smithsonian Cont Zool. 512.
				Pantopoda	153	5	60	20	173	0
		Brachiopoda			73		ND	27	100	0	2 (Hiroshi Kajihara: Hokkaido University, Shunsuke Mawatari: Hokkaido University)	>1	http://research2.kahaku.go.jp/ujssb/search
			Craniata		1		ND	2	3	0
				Craniida	1	3	ND	2	3	0
			Lingulata		5		ND	4	9	0
				Lingulida	5	3	ND	4	9	0
			Rhynchonellata		67		ND	21	88	0
				Rhynchonellida	13	5	ND	2	15	0
				Terebratulida	53	4	ND	16	69	0
				Thecideida	1	3	ND	3	4	0
		Chaetognatha			36		5	6	42	0	4 (Taichiro Goto: Mie University, Kazuki Kuroda: JSNFRI, et al.)	1
			Sagittoidea		36		5	6	42	0
				Aphragmophora	25	5	0	0	25	0
				Biphragmophora	1	3	1	1	2	0
				Monophragmophora	10	4	4	5	15	0
		Choanozoa			54	4	ND	ND	54	0	ND	>1	http://research2.kahaku.go.jp/ujssb/search
		Chordata			4330		364	326	4656	3
			Ascidiacea		313		ND	0	313	2	1 (Teruaki Nishikawa: Toho University)	>2	http://research2.kahaku.go.jp/ujssb/search
				Enterogona	173	5	ND	0	173	0
				Pleurogona	140	5	ND	0	140	2
			Appendicularia		31		0	6	37	0	2 (Naonobu Shiga: HJC, Riki Sato: AMSL)	3	Chihara, M, and Murano, M (1997) An illustrated guide to marine plankton in Japan. Tokyo: Tokai University Press. 1574 p. (Japanese).
				Fritillariidae	15	5	0	2	17	0
				Kowalevskiidae	1	5	0	0	1	0
				Oikopleuridae	15	4	0	4	19	0
			Aves		84		ND	0	84	0	>1	>50	http://www3.town.haboro.hokkaido.jp/seabird/
				Charadriiformes	49	5	ND	0	49	0
				Pelecaniformes	12	5	ND	0	12	0
				Procellariiformes	23	5	ND	0	23	0
			Leptocerdia		4		ND	ND	4	0	1 (Teruaki Nishikawa: Toho University)	>1	http://research2.kahaku.go.jp/ujssb/search
				Branchiostomatidae	4	3	ND	ND	4	0
			Mammalia		46		0	1	47	0
				Cetartiodactyla	39	5	0	1	40	0	3 (Tadasu Yamada: NMNS, Masao Amano: Nagoya University, et al.)	>5	http://www.iwcoffice.org/conservation/cetacea.htm, http://www.iucnredlist.org/
				Carnivora	7	5	0	0	7	0	3 (Naoki Kohno: NMNS, Kazuo Wada: TAT, et al.)
			Pisces		3790		364	317	4107	1	15 (Keiichi Matsuura: NMNS, Tetsuji Nakabo: Kyoto University, et al.)	>50	http://research2.kahaku.go.jp/ujssb/search
				Acanthuridae	39	5	0	0	39	0
				Acipenseridae	3	5	0	0	3	0
				Acropomatidae	12	5	2	0	12	0
				Agonidae	23	5	4	0	23	0
				Albulidae	1	5	0	0	1	0
				Alepisauridae	2	5	0	0	2	0
				Alepocephalidae	20	5	5	0	20	0
				Alopiidae	3	5	0	0	3	0
				Ambassidae	5	5	0	0	5	0
				Ammodytidae	4	5	1	0	4	0
				Anarhichadidae	1	5	1	0	1	0
				Anguillidae	2	5	0	0	2	0
				Anomalopidae	1	5	0	0	1	0
				Anoplogastridae	1	5	0	0	1	0
				Anoplopomatidae	2	5	0	0	2	0
				Antennariidae	14	5	1	0	14	0
				Aphyonidae	1	5	0	0	1	0
				Aploactinidae	6	4	4	3	9	0
				Apogonidae	87	5	1	0	87	0
				Aracanidae	2	4	0	1	3	0
				Argentinidae	3	5	0	0	3	0
				Ariidae	3	5	0	0	3	0
				Ariommatidae	3	5	0	0	3	0
				Astronesthidae	16	5	0	0	16	0
				Ateleopodidae	5	5	1	0	5	0
				Atherinidae	6	4	0	3	9	0
				Aulopidae	4	5	0	0	4	0
				Aulorhynchidae	1	5	0	0	1	0
				Aulostomidae	1	5	0	0	1	0
				Balistidae	21	5	1	1	22	0
				Banjosidae	1	5	0	0	1	0
				Barbourisiidae	1	5	0	0	1	0
				Bathyclupeidae	1	5	0	0	1	0
				Bathymasteridae	3	5	0	0	3	0
				Bathysauridae	1	5	0	0	1	0
				Bathysauroides	1	5	0	0	1	0
				Belonidae	6	5	0	0	6	0
				Bembridae	2	5	0	0	2	0
				Berycidae	4	5	0	0	4	0
				Blenniidae	73	5	3	0	73	0
				Bothidae	36	5	4	0	36	0
				Bramidae	10	5	0	0	10	0
				Branchiostegidae	5	5	0	1	6	0
				Bregmacerotidae	6	5	1	0	6	0
				Bythitidae	9	5	2	0	9	0
				Caesionidae	10	5	0	0	10	0
				Callanthiidae	3	5	0	0	3	0
				Callionymidae	37	5	7	0	37	0
				Caproidae	3	5	0	0	3	0
				Caracanthidae	2	5	0	0	2	0
				Carangidae	56	5	0	1	57	0
				Carapidae	12	5	3	0	12	0
				Carcharhinidae	22	5	0	2	24	0
				Caristiidae	1	5	0	0	1	0
				Caulophrynidae	2	5	0	0	2	0
				Centriscidae	2	5	0	0	2	0
				Centrogenysidae	1	5	0	0	1	0
				Centrolophidae	4	5	1	0	4	0
				Centrophoridae	8	5	3	0	8	0
				Cepolidae	8	5	2	0	8	0
				Ceratiidae	3	5	0	0	3	0
				Cetomimidae	7	5	1	0	7	0
				Cetorhinidae	1	5	0	0	1	0
				Chaenopsidae	6	5	3	0	6	0
				Chaetodontidae	51	5	0	0	51	0
				Champsodontidae	4	5	0	0	4	0
				Chanidae	1	5	0	0	1	0
				Chauliodontidae	2	5	0	0	2	0
				Chaunacidae	3	5	0	0	3	0
				Cheilodactylidae	3	5	2	0	3	0
				Chiasmodontidae	6	5	0	0	6	0
				Chimaeridae	8	5	5	0	8	0
				Chirocentridae	1	5	0	0	1	0
				Chlamydoselachidae	1	5	0	0	1	0
				Chlopsidae	4	5	0	0	4	0
				Chlorophthalmidae	7	5	1	0	7	0
				Cirrhitidae	14	5	0	0	14	0
				Citharidae	3	5	0	0	3	0
				Clinidae	2	5	1	0	2	0
				Clupeidae	17	5	0	0	17	0
				Colocongridae	2	5	0	0	2	0
				Congridae	25	5	5	0	25	0
				Congrogadidae	1	5	0	0	1	0
				Coryphaenidae	2	5	0	0	2	0
				Cottidae	80	5	37	6	86	0
				Creediidae	4	5	1	0	4	0
				Cryptacanthodidae	1	5	1	0	1	0
				Cyclopteridae	10	5	0	0	10	0
				Cyematidae	1	5	0	0	1	0
				Cynoglossidae	18	5	1	0	18	0
				Dactylopteridae	3	5	0	0	3	0
				Dalatiidae	5	5	0	0	5	0
				Dasyatidae	15	5	2	0	15	0
				Derichthyidae	2	5	0	0	2	0
				Diceratiidae	1	5	0	0	1	0
				Diodontidae	7	5	0	0	7	0
				Diretmidae	2	5	0	0	2	0
				Draconettidae	4	5	0	0	4	0
				Drepanidae	2	5	0	0	2	0
				Echeneidae	8	5	0	0	8	0
				Echinorhinidae	2	5	0	0	2	0
				Eleotridae	12	5	0	3	15	0
				Elopidae	1	5	0	0	1	0
				Embiotocidae	3	5	1	0	3	0
				Emmelichthyidae	4	5	1	0	4	0
				Engraulidae	9	5	1	0	9	0
				Ephippididae	5	5	0	0	5	0
				Epigonidae	5	5	1	0	5	0
				Ereuniidae	2	5	2	0	2	0
				Etmopteridae	12	5	1	0	12	0
				Eurypharyngidae	1	5	0	0	1	0
				Evermannellidae	4	5	0	0	4	0
				Exocoetidae	30	5	1	0	30	0
				Fistulariidae	2	5	0	0	2	0
				Gadidae	4	5	0	0	4	0
				Gasterosteidae	8	5	2	0	8	0
				Gempylidae	12	5	0	0	12	0
				Gerreidae	10	4	0	3	13	0
				Gigantactinidae	5	5	0	0	5	0
				Giganthiidae	1	5	0	0	1	0
				Girellidae	3	5	0	0	3	0
				Glaucosomatidae	1	5	0	0	1	0
				Gobiesocidae	11	5	2	0	11	0
				Gobiidae	367	5	28	216	583	0
				Gonorynchidae	1	5	0	0	1	0
				Gonostomatidae	12	5	0	0	12	0
				Grammicolepididae	2	5	0	0	2	0
				Gymnuridae	2	5	0	0	2	0
				Haemulidae	20	5	0	0	20	0
				Halosauridae	2	5	0	0	2	0
				Hemiramphidae	9	5	0	0	9	0
				Hemiscyllidae	4	5	0	0	4	0
				Hemitripteridae	4	5	0	0	4	0
				Heterodontidae	2	5	1	0	2	0
				Hexagrammidae	7	5	0	0	7	0
				Hexanchidae	3	5	0	0	3	0
				Hexatrygonidae	1	5	0	0	1	0
				Himantolophidae	2	5	1	0	2	0
				Holocentridae	38	5	2	1	39	0
				Hoplichthyidae	5	5	1	0	5	0
				Howellidae	4	5	1	1	5	0
				Hypoptychidae	1	5	0	0	1	0
				Icosteidae	1	5	0	0	1	0
				Idiacanthidae	2	5	0	0	2	0
				Ipnopidae	2	5	0	0	2	0
				Istiophoridae	5	5	0	0	5	0
				Kraemeriidae	3	5	0	0	3	0
				Kuhliidae	4	5	0	0	4	0
				Kyphosidae	5	5	0	0	5	0
				Labridae	144	5	0	0	144	0
				Lamnidae	4	5	0	0	4	0
				Lampridae	1	5	0	0	1	0
				Latidae	2	5	1	0	2	0
				Leiognathidae	11	5	0	1	12	0
				Lethrinidae	27	5	0	1	28	0
				Linophrynidae	2	5	0	0	2	0
				Liparidae	46	5	13	4	50	0
				Lipogenyidae	1	5	0	0	1	0
				Lobotidae	1	5	0	0	1	0
				Lophiidae	7	5	0	0	7	0
				Lophotidae	2	5	0	0	2	0
				Loricariidae	1	5	0	0	1	0
				Lutjanidae	49	5	0	2	51	0
				Luvaridae	1	5	0	0	1	0
				Macroramphosidae	1	5	0	0	1	0
				Macrouridae	68	5	25	0	68	0
				Macrouroididae	1	5	0	0	1	0
				Macrurocyttidae	1	5	0	0	1	0
				Malacanthidae	5	5	0	0	5	0
				Malacosteidae	3	5	0	0	3	0
				Megachasmidae	1	5	0	0	1	0
				Megalomycteridae	1	5	0	0	1	0
				Megalopidae	1	5	0	0	1	0
				Melamphaidae	10	5	0	0	10	0
				Melanocetidae	2	5	0	0	2	0
				Melanonidae	1	5	0	0	1	0
				Melanostomiidae	35	5	2	0	35	0
				Menidae	1	5	0	0	1	0
				Merlucciidae	1	5	0	0	1	0
				Microcanthidae	1	5	0	0	1	0
				Microdesmidae	24	5	0	2	26	0
				Microstomatidae	8	5	1	0	8	0
				Mirapinnidae	1	5	0	0	1	0
				Mitsukurinidae	1	5	0	0	1	0
				Molidae	3	5	0	0	3	0
				Monacanthidae	31	5	1	1	32	0
				Monocentridae	1	5	0	0	1	0
				Monodactylidae	1	5	0	0	1	0
				Monognathidae	1	5	1	0	1	0
				Moridae	18	5	9	0	18	0
				Moringuidae	4	5	0	0	4	0
				Moronidae	3	5	1	0	3	1
				Mugilidae	15	5	0	0	15	0
				Mullidae	22	5	0	2	24	0
				Muraenesocidae	4	5	0	0	4	0
				Muraenidae	54	5	0	0	54	0
				Myctophidae	88	5	1	0	88	0
				Myliobatidae	9	5	0	0	9	0
				Myrocongridae	1	5	0	0	1	0
				Myxinidae	5	5	1	0	5	0
				Nemichthyidae	3	5	0	0	3	0
				Nemipteridae	21	5	0	0	21	0
				Neoscopelidae	4	5	0	0	4	0
				Nettastomatidae	5	5	0	0	5	0
				Nomeidae	8	5	0	0	8	0
				Notacanthidae	3	5	0	0	3	0
				Notocheiridae	1	5	1	0	1	0
				Notorynchidae	1	5	0	0	1	0
				Notosudidae	5	5	0	0	5	0
				Odontaspididae	2	5	0	0	2	0
				Odontobutidae	1	3	2	1	2	0
				Ogcocephalidae	19	5	1	1	20	0
				Oneirodidae	6	5	0	0	6	0
				Ophichthidae	40	5	13	0	40	0
				Ophidiidae	30	5	10	0	30	0
				Opisthoproctidae	5	5	0	0	5	0
				Opistognathiae	9	5	5	0	9	0
				Oplegnathidae	2	5	0	0	2	0
				Orectolobidae	3	5	0	0	3	0
				Oreosomatidae	1	5	0	0	1	0
				Osmeridae	7	5	0	0	7	0
				Ostraciidae	9	5	0	0	9	0
				Ostracoberycidae	2	5	1	0	2	0
				Oxynotidae	1	5	1	0	1	0
				Parabembridae	1	5	0	0	1	0
				Parabrotulidae	2	5	1	0	2	0
				Paralepididae	21	5	1	0	21	0
				Paralichthyidae	10	5	1	0	10	0
				Parascylliidae	2	5	1	0	2	0
				Paraulopidae	4	5	2	0	4	0
				Parazenidae	1	5	0	0	1	0
				Pegasidae	3	5	0	0	3	0
				Pempheridae	5	5	0	0	5	0
				Pentacerotidae	4	5	0	0	4	0
				Percophidae	13	5	0	0	13	0
				Peristediidae	15	5	4	0	15	0
				Petromyzontidae	4	5	0	0	4	0
				Pholidae	6	5	1	0	6	0
				Phosichthyidae	9	5	0	0	9	0
				Pinguipedidae	24	5	0	0	24	0
				Platycephalidae	17	5	0	0	17	0
				Platyrhinidae	1	5	0	0	1	0
				Platytroctidae	3	5	0	0	3	0
				Plecoglossidae	2	5	1	0	2	0
				Plesiobatididae	1	5	0	0	1	0
				Plesiopidae	9	5	0	0	9	0
				Pleuronectidae	33	5	0	0	33	0
				Plotosidae	1	5	0	0	1	0
				Poeciliidae	2	5	0	0	2	0
				Poecilopsettidae	1	5	0	0	1	0
				Polymixiidae	4	5	1	0	4	0
				Polynemidae	4	5	0	0	4	0
				Polyprionidae	2	5	1	0	2	0
				Pomacanthidae	30	5	1	0	30	0
				Pomacentridae	99	5	2	0	99	0
				Priacanthidae	10	5	0	1	11	0
				Pristidae	1	5	0	0	1	0
				Pristiophoridae	1	5	0	0	1	0
				Proscylliidae	2	5	1	0	2	0
				Pseudocarcharinidae	1	5	0	0	1	0
				Pseudochromidae	7	5	0	0	7	0
				Pseudoplesiopidae	1	5	0	0	1	0
				Pseudotriakidae	1	5	0	0	1	0
				Pseudotrichonotidae	1	5	1	0	1	0
				Psychrolutidae	11	5	3	1	12	0
				Pterothrissidae	1	5	1	0	1	0
				Ptilichthyidae	1	5	0	0	1	0
				Rachycentridae	1	5	0	0	1	0
				Rajidae	33	5	9	0	33	0
				Regalecidae	1	5	0	0	1	0
				Rhamphocottidae	1	5	0	0	1	0
				Rhincodontidae	3	5	0	0	3	0
				Rhinobatidae	3	5	0	0	3	0
				Rhinochimaeridae	3	5	0	0	3	0
				Rhyacichthyidae	1	5	0	0	1	0
				Rhynchobatidae	2	5	0	0	2	0
				Rondeletiidae	1	5	0	0	1	0
				Salangidae	4	5	2	0	4	0
				Salmonidae	20	5	6	0	20	0
				Samaridae	5	5	1	0	5	0
				Scaridae	34	5	0	0	34	0
				Scatophagidae	1	5	0	0	1	0
				Schindleriidae	1	3	0	8	9	0
				Sciaenidae	17	5	0	0	17	0
				Scomberesocidae	1	5	0	0	1	0
				Scombridae	21	5	0	0	21	0
				Scombrolabracidae	1	5	0	0	1	0
				Scombropidae	2	5	1	0	2	0
				Scopelarchidae	11	5	0	0	11	0
				Scorpaenidae	99	5	15	12	111	0
				Scorpididae	1	5	0	0	1	0
				Scyliorhinidae	16	5	5	0	16	0
				Serranidae	129	5	8	0	129	0
				Serrivomeridae	2	5	0	0	2	0
				Siganidae	12	5	0	0	12	0
				Sillaginidae	4	5	0	0	4	0
				Sinipercidae	1	5	0	0	1	0
				Soleidae	17	5	2	0	17	0
				Solenostomidae	3	5	0	0	3	0
				Somniosidae	6	5	1	0	6	0
				Sparidae	13	5	0	1	14	0
				Sphyraenidae	9	5	0	0	9	0
				Sphyrnidae	3	5	0	0	3	0
				Squalidae	8	5	2	0	8	0
				Squatinidae	2	5	0	0	2	0
				Sternoptychidae	17	5	2	0	17	0
				Stichaeidae	34	5	6	1	35	0
				Stomiidae	3	5	0	0	3	0
				Stromateidae	4	5	0	0	4	0
				Symphysanodontidae	2	5	0	0	2	0
				Synanceiidae	9	5	0	0	9	0
				Synaphobranchidae	10	5	0	0	10	0
				Synbranchidae	1	5	0	0	1	0
				Syngnathidae	51	5	2	0	51	0
				Synodontidae	23	5	0	0	23	0
				Teraponidae	7	5	1	0	7	0
				Tetragonuridae	2	5	0	0	2	0
				Tetraodontidae	51	5	2	4	55	0
				Tetrarogidae	8	5	3	0	8	0
				Torpedinidae	6	5	1	0	6	0
				Toxotidae	1	5	0	0	1	0
				Trachichthyidae	6	5	3	0	6	0
				Trachipteridae	5	5	0	0	5	0
				Triacanthidae	1	5	0	0	1	0
				Triacanthodidae	7	5	0	0	7	0
				Triakidae	5	5	0	0	5	0
				Trichiuridae	12	5	1	0	12	0
				Trichodontidae	1	5	0	0	1	0
				Trichonotidae	3	5	0	0	3	0
				Triglidae	19	5	2	0	19	0
				Triodontidae	1	5	0	0	1	0
				Tripterygiidae	22	5	2	2	24	0
				Uranoscopidae	7	5	0	0	7	0
				Urolophidae	1	5	0	0	1	0
				Veliferidae	2	5	0	0	2	0
				Xenisthmidae	4	3	0	6	10	0
				Xiphiidae	1	5	0	0	1	0
				Zanclidae	1	5	0	0	1	0
				Zaproridae	1	5	0	0	1	0
				Zeidae	4	3	0	5	9	0
				Zoarcidae	67	4	21	19	86	0
			Reptilia		22		ND	0	22	0
				Cheloniidae	5	5	ND	0	5	0	>1	>3	http://research2.kahaku.go.jp/ujssb/search
				Dermochelyidae	1	5	ND	0	1	0
				Squamata	16	5	ND	0	16	0			http://mail2.nara-edu.ac.jp/ ~inoue/NNM/ hatyuurui/ wamei-h.html
			Thaliacea		40		0	2	42	0	1 (Jun Nishikawa: University of Tokyo)	1	Nishikawa J (1997) Phylum Chordata, Subphylum Urochordata=Subphylum Tunicata, Class Thaliacea. In: Chihara M, Murano M, editor. An illustrated guide to marine plankton in Japan. Tokyo: Tokai University Press, pp. 1351-1392, 1525-1528 (Japanese).
				Doliolida	4	5	0	1	5	0
				Pyrosomatida	8	5	0	0	8	0
				Salpida	28	5	0	1	29	0
		Cnidaria			1876		350	364	2240	1
			Anthozoa		1296		238	355	1651	0
				Actiniaria	174	5	26	30	204	0	2 (Kensuke Yanagi: NHMIC, Hiroomi Uchida: KMPC)	4	Yanagi K (2006) Sea anemones around the Sagami Sea with the list of Japanese species. Mem Nat Sci Mus Tokyo 40: 113-173.
				Alcyonacea	223	5	50	120	343	0	4 (Yukimitsu Imahara: BIK, Fumihito Iwase BIK, et al.)	7	Imahara Y (2006) Preliminary report on the Alcyonacean and Pennatulacean octocorals collected by the Natural History Research of the Sagami Sea. Mem Nat Sci Mus Tokyo 40: 91-101.
				Antipatharia	ND	1	ND	ND	ND	0
				Ceriantharia	4	3	ND	ND	4	0	1 (Hiroomi Uchida: KMPC)	>5	http://research2.kahaku.go.jp/ujssb/search
				Corallimorpharia	11	4	ND	ND	11	0
				Gorgonacea	241	5	115	70	311	0	4 (Yukimitsu Imahara: BIK, Fumihito Iwase BIK, et al.)	8	Imahara Y (1996) Previously recorded octocorals from Japan and adjacent seas. Precious Corals Octocoral Res 17-44.
				Helioporacea	1	3	0	ND	1	0		3
				Pennatulacea	71	4	24	20	91	0		5	Imahara Y (2006) Preliminary report on the Alcyonacean and Pennatulacean octocorals collected by the Natural History Research of the Sagami Sea. Mem Nat Sci Mus Tokyo 40: 91-101.
				Scleractinia	530	5	10	100	630	0	10 (Hironobu Fukami: Kyoto University, Keiichi Nomura: KMPC, et al.)	>10	Nishihira M, Veron JEN (1995) Hermatypic corals of Japan. Tokyo: Kaiyusha. 440 p. (Japanese).
				Stolonifera	18	4	8	10	28	0	1 (Yukimitsu Imahara: BIK)	3	Imahara Y (2006) Preliminary report on the Alcyonacean and Pennatulacean octocorals collected by the Natural History Research of the Sagami Sea. Mem Nat Sci Mus Tokyo 40: 91-101.
				Telestacea	8	3	5	5	13	0		4	Imahara Y (1996) Previously recorded octocorals from Japan and adjacent seas. Precious Corals Octocoral Res 17-44.
				Zoantharia	15	4	ND	ND	15	0	1 (James Davis Reimer: University of the Ryukyus)	>5	http://research2.kahaku.go.jp/ujssb/search
			Cubozoa		4		3	ND	4	0	2 (Shin Kubota: Kyoto University, Hiroshi Namikawa: NMNS)	>5
				Cubomedusae	4	4	3	ND	4	0
			Hydrozoa		539		105	9	539	0
				Actinulida	1	3	ND	ND	1	0
				Athecata	130	5	53	ND	130	0
				Laingiomedusa	1	3	0	ND	1	0
				Limnomedusae	8	3	2	ND	8	0
				Milleporina	10	4	ND	ND	10	0
				Narcomedusae	9	3	0	ND	9	0
				Siphonophora	54	4	4	9	54	0
				Stylasterina	24	4	ND	ND	24	0
				Thecata	286	5	46	ND	286	0
				Trachymedusae	16	4	0	ND	16	0
			Scyphozoa		37		4	ND	37	1
				Coronatae	7	3	2	ND	7	0
				Rhizostomeae	10	4	2	ND	10	1
				Semaeostomeae	12	4	0	ND	12	0
				Stauromedusae	8	3	0	ND	8	0
		Ctenophora			41		15	13	54	0	4 (Takushi Horita, Dhugal J. Lindsay: JAMSTEC, et al.)	3	http://www.catalogueoflife.org/annual-checklist/search.php
			Nuda		6		2	0	6	0
				Beroida	6	5	2	0	6	0
			Tentaculata		35		13	13	48	0
				Cestida	1	5	0	0	1	0
				Cydippida	12	4	0	6	18	0
				Ganeshida	0	1	0	1	1	0
				Lobata	13	5	6	3	16	0
				Platyctenida	8	5	7	1	9	0
				Thalassocalycida	1	5	0	0	1	0
				incertae sedis	ND	1	ND	2	ND	0
		Cycliophora			ND	1	ND	ND	ND	ND	-
		Dicyemida			120	5	40	30	150	0	1 (Hidetaka Furuya: Osaka University)	>1
		Echinodermata			1052		ND	ND	1052	0
			Asteroidea		280		ND	ND	280	0	2 (Toshihiko Fujita: NMNS, Masaki Saba)	1	Hayashi R (1973) The sea-stars of Sagami Bay. Tokyo: Hoikusha. 239 p. (Japanese).
				Brisingida	15	4	ND	ND	15	0			http://research2.kahaku.go.jp/ujssb/search
				Forcipulitida	47	4	ND	ND	47	0
				Notomyotida	10	4	ND	ND	10	0
				Spinulosida	30	4	ND	ND	30	0
				Paxillosida	51	4	ND	ND	51	0			Saba M, Fujita T (2006) Asteroidea (Echinodermata) from the Sagami Sea, central Japan. 1. Paxillosida and Valvatida. Mem Nat Sci Mus Tokyo 41: 251-287.
				Valvatida	105	5	ND	ND	105	0
				Velatida	22	4	ND	ND	22	0			http://research2.kahaku.go.jp/ujssb/search
			Crinoidea		111		ND	ND	111	0	2 (Toshihiko Fujita: NMNS, Ichizo Kogo: OMNH)	2
				Bourgueticrinida	2	3	ND	ND	2	0			http://research2.kahaku.go.jp/ujssb/search
				Comatulida	96	4	ND	ND	96	0			Kogo I (2006) Comatulid Fauna (Echinodermata: Crinoidea: Comatulida) of the Sagami Sea and a Part of Izu Islands, central Japan. Mem Nat Sci Mus Tokyo 41: 223-287.
				Hyocrinida	3	3	ND	ND	3	0			Kogo I (1998) Crinoids from Japan and its adjacent waters. Special publication. Osaka Mus Nat Hist 30: 1-148.
				Isocrinida	10	4	ND	ND	10	0			http://research2.kahaku.go.jp/ujssb/search
			Echinoidea		161		ND	ND	161	0	1 (Michio Shigei)	2	Shigei M (2006) A systematical study on the echinoids (Echinoermata, Echinoidea) from the Sagami Sea. Mem Nat Sci Mus, Tokyo 41: 305-327.
				Cassiduloida	4	3	ND	ND	4	0			http://research2.kahaku.go.jp/ujssb/search
				Cidaroida	25	4	ND	ND	25	0
				Clypeasteroida	25	4	ND	ND	25	0
				Diadematoida	18	4	ND	ND	18	0
				Echinoida	35	4	ND	ND	35	0
				Echinothurioida	11	4	ND	ND	11	0
				Holectypoida	2	3	ND	ND	2	0
				Spatangoida	41	4	ND	ND	41	0
			Holothuroidea		192		ND	ND	192	0	1 (Tohru Imaoka)	2
				Apodida	31	4	ND	ND	31	0
				Aspidochirotida	65	4	ND	ND	65	0
				Dactylochirotida	5	3	ND	ND	5	0
				Dendrochirotida	50	4	ND	ND	50	0
				Elapsipodida	26	4	ND	ND	26	0
				Molpadiida	15	4	ND	ND	15	0
			Ophiuroidea		308		ND	ND	308	0	2 (Toshihiko Fujita: NMNS, Seiichi Irimura: NMNS)	1	Irimura S (1982) The brittle-stars of Sagami Bay. Tokyo: Hoikusha. 95 p. (Japanese).
				Ophiurida	256	5	ND	ND	256	0
				Euryalida	52	4	ND	ND	52	0
		Echiura			21		ND	ND	21	0	1 (Teruaki Nishikawa: Toho University)	>2	http://research2.kahaku.go.jp/ujssb/search
			Echiura		21		ND	ND	21	0
				Echiuroinea	20	4	ND	ND	20	0
				Xenopneusta	1	3	ND	ND	1	0
		Ectoprocta/Bryozoa			300	5	ND	900	1200	0	2 (Hiroshi Kajihara: Hokkaido University, Shunsuke Mawatari: Hokkaido University)	ND
		Entoprocta			41		33	210	251	0	1 (Tohru Iseto: Kyoto University)	1
				Barentsiidae	8	3	2	5	13	0
				Loxokalypodidae	0	1	0	1	1	0
				Loxosomatidae	30	4	30	200	230	0
				Pedicellinidae	3	3	1	4	7	0
		Gastrotricha			12		3	100	112	0	1 (Yoshihisa Shirayama: Kyoto University)	0
			Gastrotricha		12		3	100	112	0
				Chaetonotida	6	3	2	50	56	0
				Macrodasyida	6	3	1	50	56	0
		Gnathostomulida			5		0	100	105	0	1 (Yoshihisa Shirayama: Kyoto University)		Wolfgang Sterr, Personal Communication
				Bursovaginoidea	5	3	0	95	100	0
				Filospermoidea	0	1	0	5	5	0
		Hemichordata			11		ND	10	21	0	1 (Teruaki Nishikawa: Toho University)	>2	http://research2.kahaku.go.jp/ujssb/search
			Enteropneusta		8		ND	ND	8	0
				Harrimaniidae	2	3	ND	ND	2	0
				Ptychoderidae	3	3	ND	ND	3	0
				Saxipendiidae	1	3	ND	ND	1	0
				Spengeliidae	2	3	ND	ND	2	0
			Pterobranchia		3	3	ND	ND	3	0
		Kinorhyncha			7		4	100	107	0	1 (Yoshihisa Shirayama: Kyoto University)	0
			Kinorhyncha		7	3	4	100	107	0
		Loricifera			1		1	10	11	0
			Loricifera		1		1	10	11	0
				Nanaloricida	1	3	1	10	11	0
		Mollusca			8658		334	1180	9838	11
			Bivalvia		1252		46	64	1316	7	3 (Takashi Okutani: JAMSTEC, Akihiko Matsukuma: Kyushu University, et al.)	>10	Higo S, Callomon P, Goto Y (1999) Catalogue and bibliography of the marine shell-bearing Mollusca of Japan. Osaka: Elle Scientific Publications. 749 p.
				Arcoida	79	5	ND	9	88	0
				Limoida	34	5	ND	3	37	0
				Myoida	70	5	ND	2	72	0
				Mytiloida	96	5	ND	5	101	4
				Nuculoida	79	5	ND	2	81	0
				Ostreoida	25	5	ND	0	25	0
				Pectinoida	114	5	ND	2	116	0
				Pholadomyoida	96	5	ND	0	96	0
				Pterioida	44	5	ND	3	47	0
				Solemyoida	9	5	ND	1	10	0
				Veneroida	606	5	ND	37	643	3
			Caudofoveata		3		ND	25	28	0	1 (Hiroshi Saito: NMNS)		http://research2.kahaku.go.jp/ujssb/search
				Chaetodermatida	3	3	ND	25	28	0
			Cephalopoda		204		ND	5	209	0	3 (Takashi Okutani: JAMSTEC, Tsunemi Kubodera: NMNS, et al.)		Tsuchiya K, Yamamoto N, Abe H (2002) Cephalopods in Japanese waters. Tokyo. TBS-Britannica. 139 p. (Japanese).
				Nautiloida	1	5	ND	0	1	0
				Octopoda	61	5	ND	2	63	0
				Sepioida	22	5	ND	1	23	0
				Sepiolida	15	5	ND	0	15	0
				Teuthoida	104	5	ND	2	106	0
				Vampyromorpha	1	5	ND	0	1	0
			Gastropoda		7013		286	965	7978	4	6 (Takashi Okutani: JAMSTEC, Takenori Sasaki: University of Tokyo, et al.)	>10	Higo S, Callomon P, Goto Y (1999) Catalogue and bibliography of the marine shell-bearing Mollusca of Japan. Osaka: Elle Scientific Publications. 749 p.
				Acochlidiacea	0	5	ND	2	2	0
				Aplysiomorpha	21	5	ND	5	26	0
				Basommatophora	13	5	ND	0	13	0
				Cephalaspidea	279	4	ND	72	351	0
				Cocculiniformia	14	5	ND	3	17	0
				Discopoda	973	5	ND	182	1155	3
				Eupulmonata	32	5	ND	0	32	0
				Gymnosomata	9	5	ND	0	9	0
				Heteropoda	23	5	ND	0	23	0
				Heterostropha	583	5	ND	137	720	0
				Neogastropoda	2034	5	ND	140	2174	0
				Neomphalina	1	5	ND	0	1	0
				Neritimorpha	97	5	ND	12	109	0
				Nudibranchia	435	4	ND	200	635	1
				Patellogastropoda	52	5	ND	1	53	0
				Pleurobranchomorpha	16	4	ND	5	21	0
				Ptenoglossa	465	5	ND	95	560	0
				Runcinacea	2	5	ND	0	2	0
				Saccoglossa	69	5	ND	10	79	0
				Sorbeoconcha	1375	5	ND	1	1376	0
				Systellommatophora	6	3	ND	5	11	0
				Thecosomata	33	5	ND	0	33	0
				Vetigastropoda	481	5	ND	95	576	0
			Polyplacophora		129		ND	48	177	0	1 (Hiroshi Saito: NMNS)	>2	Taki I (1965) Polyplacophora. In: Okada K, Uchida S, Uchida T. editors. New illustrated encyclopedia of the fauna of Japan. Tokyo: Hokuryu-kan Publishing Co., LTD. 803 p. (Japanese).
				Neoloricata	129	4	ND	48	177	0
			Scaphopoda		47		2	0	47	0	1 (Takashi Okutani: JAMSTEC)		http://research2.kahaku.go.jp/ujssb/search
				Dentaliida	25	5	0	0	25	0
				Gadiliida	22	5	2	0	22	0
			Solenogastres		10		ND	73	83	0	1 (Hiroshi Saito: NMNS)	0
				Cavibelonia	9	3	ND	60	69	0
				Neomeniamorpha	1	3	ND	7	8	0
				Pholidoskepia	0	1	ND	5	5	0
				Sterrofustia	0	1	ND	1	1	0
		Myxozoa			62		6	ND	62	2	1 (Hiroshi Yokoyama:University of Tokyo)	6	Eiras JC (2006) Synopsis of the species of Ceratomyxa Thelohan, 1892 (Myxozoa: Myxosporea: Ceratomyxidae). Syst Parasit 65: 49-71.
			Myxosporea		62		6	ND	62	2
				Bivalvulida	47	4	6	ND	47	1
				Multivalvulida	15	4	ND	ND	15	1
		Nematoda			70		35	115010	115080	0	1 (Yoshihisa Shirayama: Kyoto University)	>1	Yoshikawa N (2002) Brief review of Japanese researches on free living marine nematodes. In: Nakasone K, editor. Progress in Nematology, Tsukuba: Jpn Soc Nemato. pp. 64-70.
			Adenophorea		69		35	115000	115069	0
				Araeolaimida	2	3	1	10000	10002	0
				Chromadorida	29	4	16	30000	30029	0
				Desmodora	9	3	6	20000	20009	0
				Desmoscolecida	0	1	0	5000	5000	0
				Enoplida	18	4	9	20000	20018	0
				Monhysterida	11	4	3	30000	30011	0
			Secernentea		1		0	10	11	0
				Rhabditida	1	3	0	10	11	0
		Nematomorpha			1		1	100	101	0		0
			Nematomorpha		1		1	100	101	0
				Nectonematoida	1	3	1	100	101	0
		Nemertea			120		ND	58	178	0	1 (Hiroshi Kajihara: Hokkaido University)	ND	http://research2.kahaku.go.jp/ujssb/search
			Hoplonemertea		57		ND	36	93	0
				Amphiporidae	14	4	ND	10	24	0
				Carcinonemertidae	1	5	ND	0	1	0
				Cratenemertidae	3	3	ND	3	6	0
				Emplectonematidae	10	4	ND	3	13	0
				Malacobdellidae	1	5	ND	0	1	0
				Ototyphlonemertidae	3	3	ND	3	6	0
				Pelagica	2	5	ND	0	2	0
				Reptantia	3	3	ND	4	7	0
				Poseidonemertidae	1	3	ND	4	5	0
				Prosorhochmidae	2	3	ND	3	5	0
				Tetrastemmatidae	17	4	ND	6	23	0
			Palaeonemertea		11		ND	4	15	0
				Callineridae	1	4	ND	ND	ND	0
				Cephalotrichidae	3	3	ND	2	5	0
				Tubulanidae	7	4	ND	2	9	0
			Pilidiophora		52		ND	18	70	0
				Gorgonorhynchidae	0	1	ND	1	1	0
				Hubrechtiidae	3	4	ND	1	4	0
				Lineidae	42	4	ND	15	57	0
				Valenciniidae	7	5	ND	1	8	0
		Orthonecta			1	3	ND	3	4	0	1 (Hidetaka Furuya: Osaka University)	ND
		Phoronida			2		ND	ND	2	0	2 (Hiroshi Kajihara: Hokkaido University, Shunsuke Mawatari: Hokkaido University)	ND	http://research2.kahaku.go.jp/ujssb/search
			Phoranidea		2		ND	ND	2	0
				Phoronidae	2	3	ND	ND	2	0
		Placozoa			1	3	ND	ND	1	0	1 (Hiroshi Kajihara: Hokkaido University)	ND
		Platyhelminthes			188		ND	350	538	0	2 (Ken-ichi Tajika: Nihon University, Morio Hagiya: Atsugi-nishi High School)	1
			Catenulida		0		ND	50	50	0
				Catenulida	0	1	ND	50	50	0
			Eulecithophora		37		ND	100	137	0
				Dalyellioida	5	3	ND	ND	5	0
				Tricladida	6	3	ND	ND	6	0
				Proseriata	26	4	ND	100	126	0
				Urastomatida	ND	1	ND	ND	ND	0
			Lecithoepitheliata		0		ND	50	50	0
				Prorhynchidae	0	1	ND	50	50	0
			Macrostomorpha		1		ND	50	51	0
				Macrostomida	1	3	ND	50	51	0
			Polycladida		150		ND	100	250	0
				Polycladida	150	5	ND	100	250	0
		Porifera			745		ND	540	1285	0	1 (Yuji Ise: University of Tokyo)	2
			Calcarea		130		ND	20	150	0			Ogawa K (2006) Porifera of the Sagami Sea. Mem Nat Sci Mus Tokyo 40: 23–56.
				Baerida	2	3	ND	1	3	0
				Clathrinida	17	4	ND	8	25	0
				Leucosolenida	110	5	ND	10	120	0
				Lithonida	1	3	ND	1	2	0
			Demospongiae		537		ND	500	1037	0		3	http://research2.kahaku.go.jp/ujssb/search
				Agelasida	2	3	ND	10	12	0			Hoshino T (1985) Description of two new species in the genus Agelas (Demospongia) from Zamami Island, the Ryukyus, Japan. Pro Jap Spci Syst Zool 30: 1–10.
				Astrophorida	83	4	ND	30	113	0			Tanida S, Hoshino T (1989) The Demospongiae of Sagami Bay. Tokyo: Maruzen. 197 p.
				Chondrosida	3	3	ND	5	8	0
				Dendroceratida	3	3	ND	15	18	0
				Dictyoceratida	20	4	ND	15	35	0
				Hadromerida	63	4	ND	100	163	0
				Halichondrida	65	4	ND	80	145	0
				Halisarcida	0	1	ND	2	2	0
				Haplosclerida	105	5	ND	80	185	0
				Homoscleromorpha	4	3	ND	3	7	0
				"Lithistida"	11	4	ND	30	41	0
				Poecilosclerida	158	5	ND	100	258	0
				Spirophorida	20	4	ND	20	40	0
				Verongida	0	1	ND	10	10	0
			Hexactinellida		78		ND	20	98	0		14	Ogawa K (2006) Porifera of the Sagami Sea. Mem Nat Sci Mus Tokyo 40: 23–56.
				Amphidiscosida	16	4	ND	6	22	0
				Hexactinosida	21	4	ND	7	28	0
				Lyssacinosida	41	4	ND	7	48	0
		Priapulida			2		0	20	22	0	1 (Yoshihisa Shirayama: Kyoto University)	0	http://research2.kahaku.go.jp/ujssb/search
			Priapula		2		0	20	22	0
				Maccabeidae	0	1	0	5	5	0
				Priapulidae	2	3	0	10	12	0
				Tubiluchidae	0	1	0	5	5	0
		Rotifera			397		ND	1	398	0	1 (Minoru Sudzuki: Nihon University)	0
			Archeorotatoria		83		ND	0	83	0
				Bdelloidea	83	5	ND	0	83	0
			Eurotatoria		313		ND	0	313	0
				Antrorsiramida	15	5	ND	0	15	0
				Protoramida	30	5	ND	0	30	0
				Salitiramida	13	5	ND	0	13	0
				Septiramida	48	5	ND	0	48	0
				Transversiramida	207	5	ND	1	208	0
			Hemirotatoria		1		ND	0	1	0
				Paedotrochida	1	3	ND	0	1	0
		Sipuncula			47		ND	ND	47	0	1 (Teruaki Nishikawa: Toho University)	>2
			Sipunculidea		28		ND	ND	28	0
				Golfingiiformes	23	4	ND	ND	23	0
				Sipunculiformes	5	3	ND	ND	5	0
			Phascolosomatidea		19		ND	ND	19	0
				Aspidosiphoniformes	10	4	ND	ND	10	0
				Phascolosomatiformes	9	3	ND	ND	9	0
		Tardigrade			14		ND	9	23	0	3	ND	http://homepage3.nifty.com/cxj11255/jtard/index.html
			Heterotardigrada		13		ND	9	22	0
				Arthrotardigrada	13	4	ND	9	22	0
			Eutardigrada		1		ND	ND	1	0
				Parachela	1	3	ND	ND	1	0
				Total	33629		1872	121913	155542	39
	1Each abbreviation is shown in Table 2.
