# Supplementary material for: Marine Biodiversity in Japanese Waters
Source: PLoS One. 2010 Aug 2;5(8):e11836. doi: 10.1371/journal.pone.0011836 (PMC2914005; doi:10.1371/journal.pone.0011836)
Supplement: Table S6 — List of species introduced into Japanese waters, their presumed primary mechanism of transportation and origin. (0.02 MB XLS) [file pone.0011836.s006.xls]

## Sheet: Sheet1 (2)
		Table S6. List of species introduced into Japanese waters, their presumed primary mechanism of transportation and origin.
		Taxon		Presumed primary transportation mechanism	Presumed origin	References
		Phylum	Species
		Annelida	Boccardia proboscidea	Ballast water, Fisheries	Unknown
		Annelida	Ficopomatus enigmaticus	Hull fouling	Unknown	Nishi E, Kato T (2004) Introduced and globally invaded polychaetous annelids. Jpn J Benthol 59: 83-95 (Japanese), Link H, Nishi E, K. Tanaka, R. Bastida-zavala, E. K. Kupriyanova et al. (2009) Hydroides dianthus (Polychaeta: Serpulidae), an alien species introduced into Tokyo Bay, Japan. Mar Biodiv Rec: doi:10.1017/S1755267209000931.
		Annelida	Harmothoe imbricata	Unknown	Unknown	Link H, Nishi E, K. Tanaka, R. Bastida-zavala, E. K. Kupriyanova et al. (2009) Hydroides dianthus (Polychaeta: Serpulidae), an alien species introduced into Tokyo Bay, Japan. Mar Biodiv Rec: doi:10.1017/S1755267209000931.
		Annelida	Hydroides elegans	Hull fouling	Unknown	Nishi E, Kato T (2004) Introduced and globally invaded polychaetous annelids. Jpn J Benthol 59: 83-95 (Japanese), Link H, Nishi E, K. Tanaka, R. Bastida-zavala, E. K. Kupriyanova et al. (2009) Hydroides dianthus (Polychaeta: Serpulidae), an alien species introduced into Tokyo Bay, Japan. Mar Biodiv Rec: doi:10.1017/S1755267209000931.
		Annelida	Hydroides dianthus	Unknown	Unknown	Nishi E, Kato T (2004) Introduced and globally invaded polychaetous annelids. Jpn J Benthol 59: 83-95 (Japanese), Link H, Nishi E, K. Tanaka, R. Bastida-zavala, E. K. Kupriyanova et al. (2009) Hydroides dianthus (Polychaeta: Serpulidae), an alien species introduced into Tokyo Bay, Japan. Mar Biodiv Rec: doi:10.1017/S1755267209000931.
		Annelida	Neanthes succenea	Unknown	Unknown	Link H, Nishi E, K. Tanaka, R. Bastida-zavala, E. K. Kupriyanova et al. (2009) Hydroides dianthus (Polychaeta: Serpulidae), an alien species introduced into Tokyo Bay, Japan. Mar Biodiv Rec: doi:10.1017/S1755267209000931.
		Annelida	Perinereis aibuhitensis	Unknown	Unknown	Link H, Nishi E, K. Tanaka, R. Bastida-zavala, E. K. Kupriyanova et al. (2009) Hydroides dianthus (Polychaeta: Serpulidae), an alien species introduced into Tokyo Bay, Japan. Mar Biodiv Rec: doi:10.1017/S1755267209000931.
		Annelida	Phyllodocida sp.	Unknown	Unknown	Link H, Nishi E, K. Tanaka, R. Bastida-zavala, E. K. Kupriyanova et al. (2009) Hydroides dianthus (Polychaeta: Serpulidae), an alien species introduced into Tokyo Bay, Japan. Mar Biodiv Rec: doi:10.1017/S1755267209000931.
		Annelida	Polydora cornuta	Ballast water, Fisheries	Unknown
		Annelida	Polydora sp.	Ballast water, Fisheries	Unknown
		Arthropoda	Balanus glandula	Hull fouling	North-east Pacific	Iwasaki K, Kimura T, Kinoshita K, Yamaguchi T, Nishikawa T, et al. (2004) Human-mediated introduction and dispersal of marine organisms in Japan: Results of a questionnaire survey by the committee for the preservation of the natural environment, the Japanese Association of Benthology. Jpn J Benthol 59: 22-44 (Japanese), Otani M (2004) Introduced marine organisms in Japanese coastal waters, and th…
		Arthropoda	Balanus improvisus	Hull fouling	North-east Atlantic	Iwasaki K, Kimura T, Kinoshita K, Yamaguchi T, Nishikawa T, et al. (2004) Human-mediated introduction and dispersal of marine organisms in Japan: Results of a questionnaire survey by the committee for the preservation of the natural environment, the Japanese Association of Benthology. Jpn J Benthol 59: 22-44 (Japanese), Otani M (2004) Introduced marine organisms in Japanese coastal waters, and th…
		Arthropoda	Balanus eburneus	Hull fouling	West Atlantic	Iwasaki K, Kimura T, Kinoshita K, Yamaguchi T, Nishikawa T, et al. (2004) Human-mediated introduction and dispersal of marine organisms in Japan: Results of a questionnaire survey by the committee for the preservation of the natural environment, the Japanese Association of Benthology. Jpn J Benthol 59: 22-44 (Japanese), Otani M (2004) Introduced marine organisms in Japanese coastal waters, and th…
		Arthropoda	Balanus amphitrite	Ballast water, Hull fouling	Unknown	Iwasaki K, Kimura T, Kinoshita K, Yamaguchi T, Nishikawa T, et al. (2004) Human-mediated introduction and dispersal of marine organisms in Japan: Results of a questionnaire survey by the committee for the preservation of the natural environment, the Japanese Association of Benthology. Jpn J Benthol 59: 22-44 (Japanese), Otani M (2004) Introduced marine organisms in Japanese coastal waters, and th…
		Arthropoda	Balanus variegatus cirratus	Unknown	Unknown	Iwasaki K, Kimura T, Kinoshita K, Yamaguchi T, Nishikawa T, et al. (2004) Human-mediated introduction and dispersal of marine organisms in Japan: Results of a questionnaire survey by the committee for the preservation of the natural environment, the Japanese Association of Benthology. Jpn J Benthol 59: 22-44 (Japanese), Otani M (2004) Introduced marine organisms in Japanese coastal waters, and th…
		Arthropoda	Balanus venustus	Unknown	Unknown	Iwasaki K, Kimura T, Kinoshita K, Yamaguchi T, Nishikawa T, et al. (2004) Human-mediated introduction and dispersal of marine organisms in Japan: Results of a questionnaire survey by the committee for the preservation of the natural environment, the Japanese Association of Benthology. Jpn J Benthol 59: 22-44 (Japanese), Otani M (2004) Introduced marine organisms in Japanese coastal waters, and th…
		Arthropoda	Callinectes sapidus	Hull fouling	Atlantic, Caribbean Sea	Iwasaki K, Kimura T, Kinoshita K, Yamaguchi T, Nishikawa T, et al. (2004) Human-mediated introduction and dispersal of marine organisms in Japan: Results of a questionnaire survey by the committee for the preservation of the natural environment, the Japanese Association of Benthology. Jpn J Benthol 59: 22-44 (Japanese), Otani M (2004) Introduced marine organisms in Japanese coastal waters, and th…
		Arthropoda	Carcinus aestuarii	Hull fouling	Mediterranean, Black Sea	Iwasaki K, Kimura T, Kinoshita K, Yamaguchi T, Nishikawa T, et al. (2004) Human-mediated introduction and dispersal of marine organisms in Japan: Results of a questionnaire survey by the committee for the preservation of the natural environment, the Japanese Association of Benthology. Jpn J Benthol 59: 22-44 (Japanese), Otani M (2004) Introduced marine organisms in Japanese coastal waters, and th…
		Arthropoda	Pyromaia tuberculata	Hull fouling	East Pacific	Iwasaki K, Kimura T, Kinoshita K, Yamaguchi T, Nishikawa T, et al. (2004) Human-mediated introduction and dispersal of marine organisms in Japan: Results of a questionnaire survey by the committee for the preservation of the natural environment, the Japanese Association of Benthology. Jpn J Benthol 59: 22-44 (Japanese), Otani M (2004) Introduced marine organisms in Japanese coastal waters, and th…
		Arthropoda	Siphonostomatoida sp.	Unknown	Unknown	Iwasaki K, Kimura T, Kinoshita K, Yamaguchi T, Nishikawa T, et al. (2004) Human-mediated introduction and dispersal of marine organisms in Japan: Results of a questionnaire survey by the committee for the preservation of the natural environment, the Japanese Association of Benthology. Jpn J Benthol 59: 22-44 (Japanese), Otani M (2004) Introduced marine organisms in Japanese coastal waters, and th…
		Chlorophyta	Caulerpa taxifolia	Accidental release?	Indian Ocean, Caribbean Sea, Pacific	Iwasaki K, Kimura T, Kinoshita K, Yamaguchi T, Nishikawa T, et al. (2004) Human-mediated introduction and dispersal of marine organisms in Japan: Results of a questionnaire survey by the committee for the preservation of the natural environment, the Japanese Association of Benthology. Jpn J Benthol 59: 22-44 (Japanese), Otani M (2004) Introduced marine organisms in Japanese coastal waters, and th…
		Chordata	Lateolabrax sp.	Fisheries	China, Korea
		Chordata	Molgula manhattensis	Hull fouling	Unknown
		Chordata	Polyandrocarpa zorritensis	Hull fouling	Atlantic
		Cnidaria	Nemopilema nomurai	Unknown	Unknown
		Heterokontophyta	Cutleria multifida	Hull fouling	Indian Ocean	Iwasaki K, Kimura T, Kinoshita K, Yamaguchi T, Nishikawa T, et al. (2004) Human-mediated introduction and dispersal of marine organisms in Japan: Results of a questionnaire survey by the committee for the preservation of the natural environment, the Japanese Association of Benthology. Jpn J Benthol 59: 22-44 (Japanese), Otani M (2004) Introduced marine organisms in Japanese coastal waters, and th…
		Mollusca	Mercenaria mercenaria	Unknown	West Atlantic	Iwasaki K, Kimura T, Kinoshita K, Yamaguchi T, Nishikawa T, et al. (2004) Human-mediated introduction and dispersal of marine organisms in Japan: Results of a questionnaire survey by the committee for the preservation of the natural environment, the Japanese Association of Benthology. Jpn J Benthol 59: 22-44 (Japanese), Otani M (2004) Introduced marine organisms in Japanese coastal waters, and th…
		Mollusca	Meretrix petechialis	Fisheries	China, Korea
		Mollusca	Mytilopsis sallei	Hull fouling, Cargo fouling	Caribbean Sea	Iwasaki K, Kimura T, Kinoshita K, Yamaguchi T, Nishikawa T, et al. (2004) Human-mediated introduction and dispersal of marine organisms in Japan: Results of a questionnaire survey by the committee for the preservation of the natural environment, the Japanese Association of Benthology. Jpn J Benthol 59: 22-44 (Japanese), Otani M (2004) Introduced marine organisms in Japanese coastal waters, and th…
		Mollusca	Mytilus galloprovincialis	Hull fouling	Mediterranean, East Atlantic	Iwasaki K, Kimura T, Kinoshita K, Yamaguchi T, Nishikawa T, et al. (2004) Human-mediated introduction and dispersal of marine organisms in Japan: Results of a questionnaire survey by the committee for the preservation of the natural environment, the Japanese Association of Benthology. Jpn J Benthol 59: 22-44 (Japanese), Otani M (2004) Introduced marine organisms in Japanese coastal waters, and th…
		Mollusca	Perna viridis	Hull fouling	Indian Ocean, South-east Asia	Iwasaki K, Kimura T, Kinoshita K, Yamaguchi T, Nishikawa T, et al. (2004) Human-mediated introduction and dispersal of marine organisms in Japan: Results of a questionnaire survey by the committee for the preservation of the natural environment, the Japanese Association of Benthology. Jpn J Benthol 59: 22-44 (Japanese), Otani M (2004) Introduced marine organisms in Japanese coastal waters, and th…
		Mollusca	Ptericola sp. cf. lithophaga	Unknown	Unknown	Iwasaki K, Kimura T, Kinoshita K, Yamaguchi T, Nishikawa T, et al. (2004) Human-mediated introduction and dispersal of marine organisms in Japan: Results of a questionnaire survey by the committee for the preservation of the natural environment, the Japanese Association of Benthology. Jpn J Benthol 59: 22-44 (Japanese), Otani M (2004) Introduced marine organisms in Japanese coastal waters, and th…
		Mollusca	Xenostrobus securis	Hull fouling	Oceania	Iwasaki K, Kimura T, Kinoshita K, Yamaguchi T, Nishikawa T, et al. (2004) Human-mediated introduction and dispersal of marine organisms in Japan: Results of a questionnaire survey by the committee for the preservation of the natural environment, the Japanese Association of Benthology. Jpn J Benthol 59: 22-44 (Japanese), Otani M (2004) Introduced marine organisms in Japanese coastal waters, and th…
		Mollusca	Crepidula onyx	Hull fouling	East Pacific	Iwasaki K, Kimura T, Kinoshita K, Yamaguchi T, Nishikawa T, et al. (2004) Human-mediated introduction and dispersal of marine organisms in Japan: Results of a questionnaire survey by the committee for the preservation of the natural environment, the Japanese Association of Benthology. Jpn J Benthol 59: 22-44 (Japanese), Otani M (2004) Introduced marine organisms in Japanese coastal waters, and th…
		Mollusca	Cuthona perca	Hull fouling	Brazil, Caribbean Sea	Iwasaki K, Kimura T, Kinoshita K, Yamaguchi T, Nishikawa T, et al. (2004) Human-mediated introduction and dispersal of marine organisms in Japan: Results of a questionnaire survey by the committee for the preservation of the natural environment, the Japanese Association of Benthology. Jpn J Benthol 59: 22-44 (Japanese), Otani M (2004) Introduced marine organisms in Japanese coastal waters, and th…
		Mollusca	Nassarius sinarus	Fisheries	China	Iwasaki K, Kimura T, Kinoshita K, Yamaguchi T, Nishikawa T, et al. (2004) Human-mediated introduction and dispersal of marine organisms in Japan: Results of a questionnaire survey by the committee for the preservation of the natural environment, the Japanese Association of Benthology. Jpn J Benthol 59: 22-44 (Japanese), Otani M (2004) Introduced marine organisms in Japanese coastal waters, and th…
		Mollusca	Stenothyra sp.	Fisheries	Unknown	Iwasaki K, Kimura T, Kinoshita K, Yamaguchi T, Nishikawa T, et al. (2004) Human-mediated introduction and dispersal of marine organisms in Japan: Results of a questionnaire survey by the committee for the preservation of the natural environment, the Japanese Association of Benthology. Jpn J Benthol 59: 22-44 (Japanese), Otani M (2004) Introduced marine organisms in Japanese coastal waters, and th…
		Myxozoa	Henneguya lateolabracis	Fisheries	Unknown	Ogawa, K. (2005) Parasitic diseases of fishes. Nippon Suisan Gakkaishi, 71: 650-653 (in Japanese with English abstract).
		Myxozoa	Septemcapsula yasunagai?	Fisheries	Unknown	Ogawa, K. (2005) Parasitic diseases of fishes. Nippon Suisan Gakkaishi, 71: 650-653 (in Japanese with English abstract).
